# Supplementary material for: Prevalence and correlates of overweight and obesity among adolescents in northeastern China: a cross-sectional study
Source: PubMed Central journal article supplement — BMJ Open. 2020 Jul 31;10(7):e036820. doi: 10.1136/bmjopen-2020-036820 (PMC7398099; doi:10.1136/bmjopen-2020-036820), 2020-07-31
Supplement: bmjopen-2020-036820.draft_revisions.pdf [file bmjopen-2020-036820.draft_revisions.pdf]

# BMJ Open

BMJ Open is committed to open peer review. As part of this commitment we make the peer review history of every article we publish publicly available.

When an article is published we post the peer reviewers' comments and the authors' responses online. We also post the versions of the paper that were used during peer review. These are the versions that the peer review comments apply to.

The versions of the paper that follow are the versions that were submitted during the peer review process. They are not the versions of record or the final published versions. They should not be cited or distributed as the published version of this manuscript.

BMJ Open is an open access journal and the full, final, typeset and author-corrected version of record of the manuscript is available on our site with no access controls, subscription charges or pay-per-view fees (<http://bmjopen.bmj.com>).

If you have any questions on BMJ Open's open peer review process please email [info.bmjopen@bmj.com](mailto:info.bmjopen@bmj.com)

# BMJ Open

## Prevalence and correlates of overweight and obesity among adolescent of northeastern China: a cross-sectional study

|                               |                                                                                                                                                                                                                                                                                                                                                                                                                                                                                                                                                                                                                                                                                                                                                                                                                                                                                                                                                               |
|-------------------------------|---------------------------------------------------------------------------------------------------------------------------------------------------------------------------------------------------------------------------------------------------------------------------------------------------------------------------------------------------------------------------------------------------------------------------------------------------------------------------------------------------------------------------------------------------------------------------------------------------------------------------------------------------------------------------------------------------------------------------------------------------------------------------------------------------------------------------------------------------------------------------------------------------------------------------------------------------------------|
| Journal:                      | <i>BMJ Open</i>                                                                                                                                                                                                                                                                                                                                                                                                                                                                                                                                                                                                                                                                                                                                                                                                                                                                                                                                               |
| Manuscript ID                 | bmjopen-2020-036820                                                                                                                                                                                                                                                                                                                                                                                                                                                                                                                                                                                                                                                                                                                                                                                                                                                                                                                                           |
| Article Type:                 | Original research                                                                                                                                                                                                                                                                                                                                                                                                                                                                                                                                                                                                                                                                                                                                                                                                                                                                                                                                             |
| Date Submitted by the Author: | 07-Jan-2020                                                                                                                                                                                                                                                                                                                                                                                                                                                                                                                                                                                                                                                                                                                                                                                                                                                                                                                                                   |
| Complete List of Authors:     | Duan, Ruixin; Jilin University School of Public Health, Department of Epidemiology and Biostatistics; Jilin University First Hospital, Pulmonary Division & Sleep Center<br>Kou, Changgui; Jilin University School of Public Health, Department of Epidemiology and Biostatistics<br>Jie, Jing; Jilin University First Hospital, Pulmonary Division & Sleep Center<br>bai , wei; Jilin University School of Public Health, Department of Epidemiology and Biostatistics<br>Lan, Xiaoxin; Jilin University First Hospital, Pulmonary Division & Sleep Center<br>Li, Yuanyuan; Jilin University School of Public Health, Department of Epidemiology and Biostatistics<br>Yu, Xiao; Jilin University School of Public Health, Department of Epidemiology and Biostatistics<br>Zhu, Bo; Jilin University School of Public Health, Department of Epidemiology and Biostatistics<br>yuan, haibo; Jilin University First Hospital, Pulmonary Division & Sleep Center |
| Keywords:                     | PUBLIC HEALTH, EPIDEMIOLOGY, Risk management < HEALTH SERVICES ADMINISTRATION & MANAGEMENT                                                                                                                                                                                                                                                                                                                                                                                                                                                                                                                                                                                                                                                                                                                                                                                                                                                                    |
|                               |                                                                                                                                                                                                                                                                                                                                                                                                                                                                                                                                                                                                                                                                                                                                                                                                                                                                                                                                                               |

SCHOLARONE™  
Manuscripts

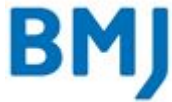

I, the Submitting Author has the right to grant and does grant on behalf of all authors of the Work (as defined in the below author licence), an exclusive licence and/or a non-exclusive licence for contributions from authors who are: i) UK Crown employees; ii) where BMJ has agreed a CC-BY licence shall apply, and/or iii) in accordance with the terms applicable for US Federal Government officers or employees acting as part of their official duties; on a worldwide, perpetual, irrevocable, royalty-free basis to BMJ Publishing Group Ltd ("BMJ") its licensees and where the relevant Journal is co-owned by BMJ to the co-owners of the Journal, to publish the Work in this journal and any other BMJ products and to exploit all rights, as set out in our [licence](#).

The Submitting Author accepts and understands that any supply made under these terms is made by BMJ to the Submitting Author unless you are acting as an employee on behalf of your employer or a postgraduate student of an affiliated institution which is paying any applicable article publishing charge ("APC") for Open Access articles. Where the Submitting Author wishes to make the Work available on an Open Access basis (and intends to pay the relevant APC), the terms of reuse of such Open Access shall be governed by a Creative Commons licence – details of these licences and which [Creative Commons](#) licence will apply to this Work are set out in our licence referred to above.

Other than as permitted in any relevant BMJ Author's Self Archiving Policies, I confirm this Work has not been accepted for publication elsewhere, is not being considered for publication elsewhere and does not duplicate material already published. I confirm all authors consent to publication of this Work and authorise the granting of this licence.

1 Prevalence and correlates of overweight and obesity  
2 among adolescent of northeastern China: a  
3 cross-sectional study

4 Ruixin Duan<sup>1, 2</sup>, Changgui Kou<sup>1</sup>, Jingjie<sup>2</sup>, Wei Bai<sup>1</sup>, Xiaoxin Lan<sup>2</sup>, Yuanyuan Li<sup>1</sup>,  
5 Xiao Yu<sup>1</sup>, Bo Zhu<sup>1</sup>, Haibo Yuan<sup>2\*</sup>

6  
7  
8 <sup>1</sup> Department of Epidemiology and Biostatistics, School of Public Health, Jilin  
9 University, 1163 Xinmin Street, Changchun, 130021, Jilin province, China;

10 <sup>2</sup> Pulmonary Division & Sleep Center, The First Hospital of Jilin University,  
11 Changchun, 130021, China.

12  
13  
14  
15  
16 \*Corresponding Author:

17 Haibo Yuan<sup>2\*</sup>

18 Xinmin Street, Changchun, 130021, China

19 Email address: hyuan@jlu.edu.cn

20 Word count: 2899

21  
22

## 23 **Abstract**

24 **Objectives:** To estimate the prevalence of overweight/obesity in adolescents and to  
25 evaluate the associated factors among this group in Changchun City, Northeastern  
26 China.

27 **Methods:** A cross-sectional study of 1955 adolescents aged 11–18 years was  
28 conducted in Changchun City, using stratified cluster sampling. Parents and  
29 caretakers of children completed the questionnaires as requested without protest,  
30 which included demographic characteristics and anthropometric parameters.  
31 Univariate and multivariate logistic regression were performed to analyze the  
32 relationship between overweight /obesity and related factors.

33 **Results:** In total, the prevalence of overweight was 12.7% (male 17.4%; female  
34 10.1%), and the prevalence of obesity was 4.9% (male 8.8%; female 3.1%) in  
35 Changchun, Jilin province. The prevalence of overweight and obesity were both  
36 higher in men than women ( $p < 0.001$ ). Multivariate logistic regression showed that  
37 overweight and obesity were significantly associated with male, age, preterm birth,  
38 parental obesity and diet habits (fruit frequency per week, eating picky and eating  
39 concentration).

40 **Conclusion:** The prevalence of overweight and obesity among adolescents in  
41 Changchun was relatively higher compared with that in Xi'an and Nanjing in recent  
42 years. Gender, age, birth history, diet habits, and parental weight were important  
43 factors for overweight and obesity in adolescents. Further research should be

1  
2  
3  
4 44 conducted about the health of adolescents in China and further intervening measures  
5  
6  
7 45 should be done to decrease the prevalence of overweight/obesity.  
8

9 46 **Keywords:** overweight; obesity; adolescent; association  
10  
11  
12

## 13 47 **Strengths and limitations of this study**

14  
15  
16

- 17 48 ● The strength of this study is precise physical measurement, which improved the  
18  
19 validity of the results.  
20 49
- 21 50 ● The analysis results might exist some information and confounding bias due to  
22  
23 the nature of cross-sectional data.  
24 51
- 25 52 ● The results were from Changchun only and therefore cannot representative of the  
26  
27 specific circumstance in Jilin Province.  
28 53  
29  
30  
31  
32  
33  
34

## 35 54 **Introduction**

36  
37  
38

39 55 The prevalence of obesity has increased dramatically among children, adolescents and  
40  
41 adults during the past decades all over the world[1]. Overall, the global proportion of  
42 56  
43 adolescents with obesity has risen significantly from just 4% in 1975 to just over 18%  
44 57  
45 in 2016[2]. There is compelling evidence implicating that a significantly higher  
46 58  
47 proportion of adolescents who were overweight or obese was found, which reached  
48 59  
49 alarming levels in recent years.  
50 60

51 61 In recent years, many scholars have conducted plenty of studies on overweight and  
52  
53 obesity. As we all know, overweight and obesity have been predisposing factors for  
54 62  
55  
56  
57  
58  
59  
60

1  
2  
3  
4 63 many chronic diseases, such as type 2 diabetes, cardiovascular diseases, respiratory  
5  
6  
7 64 diseases, musculoskeletal disorders, and various types of cancer[3]. Yan Rong et  
8  
9  
10 65 found that the association of adolescent obesity with nonalcoholic fatty liver disease  
11  
12 66 (NAFLD) and the incidence of NAFLD rose subsequently with body weight's  
13  
14  
15 67 increasing[4]. Quentin Lisan compared patients with obesity and severe obstructive  
16  
17  
18 68 sleep apnea (OSA) with and without prescription of positive airway pressure (PAP)  
19  
20  
21 69 therapy, found that participants with PAP prescriptions had a higher BMI than  
22  
23  
24 70 participants not prescribed PAP[5]. It has been estimated that overweight and obesity  
25  
26  
27 71 are the fifth leading cause of death worldwide, accounting for nearly 3.4 million  
28  
29  
30 72 deaths annually[6]. In addition, Obesity was considered as a risk factor for the  
31  
32  
33 73 development of chronic kidney disease[7]. In this condition, the American Medical  
34  
35  
36 74 Association classified obesity as a disease to get physicians to pay more attention[8].  
37  
38  
39 75 As the largest developing country, China had nearly one-third of overweight or obese  
40  
41  
42 76 adolescents until 2016; and that the obesity prevalence rate had risen from 0.10% in  
43  
44  
45 77 1976 to 8.50% in 2016. Sun HP found the prevalence of obesity and of overweight  
46  
47  
48 78 and obesity combined was 8.1% and 19.2% among children and adolescents 7–18y in  
49  
50  
51 79 age[9]; Zhang XY reported the prevalence of overweight and obesity among primary  
52  
53  
54 80 school children was 15.2% and 11.7% in Jiangsu Province[10]. Therefore, it is of key  
55  
56  
57 81 importance to make sure the risk factors of overweight and obesity to prevent  
58  
59  
60 82 adolescents from the disease.

1  
2  
3  
4 83 We investigated the physical condition of adolescents among 11-18 years from six  
5  
6  
7 84 middle schools in Changchun which is the capital of Jilin province. The aim of the  
8  
9  
10 85 current study was to reveal the prevalence of overweight and obesity and to analyze  
11  
12  
13 86 some associated factors among adolescents of overweight and obesity in Changchun,  
14  
15 87 Jilin.

## 18 19 88 **Methods**

### 22 23 89 **Subjects**

24  
25  
26  
27 90 The study sample comprised students from six middle schools (three in urban and  
28  
29  
30 91 three in rural areas) randomly in Changchun City, the capital of Jilin Province in  
31  
32  
33 92 Northeast China, using stratified cluster sampling. Overall, 1955 students aged 11–18  
34  
35  
36 93 years were contained in this cross-section survey; subjects with overweight/obesity  
37  
38  
39 94 due to known metabolic and endocrine diseases were excluded. Students were also  
40  
41  
42 95 excluded if they had mental or physical impairments severe enough to cause abnormal  
43  
44  
45 96 behaviors, including congenital disease, intellectual disability, and a psychiatric  
46  
47  
48 97 disorder[11]. The study was approved by the ethics committee of the First Hospital of  
49  
50  
51 98 Jilin University (Reference Number: 2013-031). The investigation has received  
52  
53  
54 99 informed consent from students and parents. We used the SRQR reporting  
55  
56  
57 100 guidelines[12] in this study.

### 58 59 101 **Key Variables**

60



1  
2  
3  
4 102 Body mass index (BMI) is used here as the necessary indicator for overweight and  
5  
6  
7 103 obesity of adolescent and adult. Weight category was defined using age- and sex-  
8  
9  
10 104 specific cutoff points by the international standard for BMI among adolescents[13].  
11  
12 105 As for adult, the criterion 'BMI $\geq$ 24' was defined as overweight and obesity [14, 15].  
13  
14  
15 106 Parents and caretakers provided adolescents' weight (to the nearest 1 kg) and height  
16  
17  
18 107 (to the nearest 1 cm). Overall children were classified by age as 3 groups (<13,  
19  
20 108 13-15, >15) , region as 2 groups ( urban, rural) and gender as 2 groups ( male,  
21  
22  
23 109 female). Participants who slept less than 8 h over 3 days a week were classified as  
24  
25  
26 110 'sleep <8 h', and those who slept more than 10 h over 3 days a week were defined as  
27  
28  
29 111 'sleep >10 h'[16]. Participants who were classified as 'picky eater' were defined as  
30  
31  
32 112 adolescents who had eaten something too simple in a week. According to students'  
33  
34 113 eating habits, we categorized these behaviors by whether they were done over twice a  
35  
36  
37 114 week, like eating fresh fruits, dessert, breakfast and fast-food. And students whether  
38  
39  
40 115 eating with concentration or not was a significant classification standard. Based on  
41  
42  
43 116 students' daily exercise frequency, we took students into 3 groups (never, sometimes  
44  
45 117 and often).

## 118 **Statistical analysis**

119 Data input was established using Epidata 3.1and statistical analysis was performed  
120 using SPSS 24.0. Frequency distributions were used to characterize subjects, and  
121 percentage data were used to report prevalence. The relationship between each factor

1  
2  
3  
4 122 and the adolescents' weight status was reflected by  $\chi^2$  tests, univariate and  
5  
6  
7 123 multivariate logistic regression. In univariate analysis, when  $p < 0.10$ , significant  
8  
9  
10 124 correlation factors were included in a forward stepwise multivariate logistic  
11  
12 125 regression to exclude confounding factors. In all analyses, two-tailed P value  $< 0.05$   
13  
14  
15 126 was considered statistically significant.

### 127 **Data availability**

128 Data referenced in this study are available in the project named "Effect and  
129 mechanism of weight loss on upper airway collapsibility in obese patients with  
130 OSAS". We selected a portion of the data in the database, including body  
131 measurements of adolescent from six middle schools in Changchun City. The data  
132 that support the findings of this study are available on request from the corresponding  
133 author [HY]. The data are not publicly available due to them containing information  
134 that could compromise research participant privacy or consent.

### 135 **Patient and public involvement**

136 No patient involved.

### 137 **Results**

138 On the basis of the inclusion and exclusion criteria, we chose 1955 adolescents from  
139 Changchun, of which 1825 participants were finally analyzed in this study. The  
140 participants with missing information on height or weight or extreme BMI values

1  
2  
3  
4 141 were excluded from the study. According to the analysis of the frequency distribution,  
5  
6  
7 142 we found that there were 837 boys and 988 girls included; the median age of the  
8  
9  
10 143 students was 15.30 years, ranging from 11 to 18 years; of all these subjects, 42.9%  
11  
12 144 were from rural regions and 57.1% were from urban regions; most of the subjects  
13  
14  
15 145 were Han Chinese, accounted for 98.2%, with only a few minority ethnicities.

16  
17 146 According to the BMI classification in the worldwide, the overall prevalence of  
18  
19  
20 147 overweight was 12.7% (male 17.4%; female 10.1%), and the prevalence of obesity  
21  
22  
23 148 was 4.9% (male 8.8%; female 3.1%) in Changchun city, Jilin province (Table 1). The  
24  
25  
26 149 overweight and obese rate were both higher in males than in females ( $p < 0.001$ ),  
27  
28  
29 150 respectively. A higher prevalence of overweight was found in subjects whose ages  
30  
31  
32 151 ranged from 11-12 years, and the prevalence of obesity was higher in the age groups  
33  
34 152 13-15 ( $p = 0.008$ ). Children from an urban area showed a significantly higher  
35  
36  
37 153 proportion of being overweight. Full-term birth subjects had a higher prevalence rate  
38  
39  
40 154 than others ( $p = 0.014$ ). In addition, Students who had poor diet habits, such as ate  
41  
42 155 fruits less than twice a week ( $p = 0.029$ ), enjoyed fast-food and desserts, ate without  
43  
44  
45 156 concentration ( $p = 0.004$ ) and those picky eaters ( $p = 0.028$ ), were much more likely to  
46  
47  
48 157 be overweight or obese. What's more, a higher prevalence of overweight was found in  
49  
50  
51 158 subjects who never exercised than others. As for genetic factors, we found that  
52  
53  
54 159 parental weight showed significant improvement in compared with childhood weight.

55  
56 160 **Table 1**

57  
58 161 **Prevalence of overweight and obesity according to demographic characteristics**  
59  
60

| Variables                   | n    | Overweight |          |          | Obesity |          |          |
|-----------------------------|------|------------|----------|----------|---------|----------|----------|
|                             |      | PR (%)     | $\chi^2$ | <i>p</i> | PR (%)  | $\chi^2$ | <i>p</i> |
| Gender                      |      |            |          |          |         |          |          |
| Male                        | 837  | 17.4       | 19.81    | <0.001   | 8.8     | 23.843   | <0.001   |
| Female                      | 988  | 10.1       |          |          | 3.1     |          |          |
| Area                        |      |            |          |          |         |          |          |
| Urban                       | 1042 | 14.4       | 2.178    | 0.14     | 5.6     | 0.03     | 0.863    |
| Rural                       | 783  | 12         |          |          | 5.8     |          |          |
| Age                         |      |            |          |          |         |          |          |
| <13                         | 168  | 19.3       | 9.658    | 0.008    | 5.1     | 0.407    | 0.816    |
| 13-15                       | 1157 | 11.6       |          |          | 5.9     |          |          |
| >15                         | 500  | 15.5       |          |          | 5.2     |          |          |
| Birth history               |      |            |          |          |         |          |          |
| Full-term birth             | 1621 | 14.2       | 8.525    | 0.014    | 6       | 2.513    | 0.285    |
| Preterm birth               | 133  | 5.2        |          |          | 3.2     |          |          |
| Post-term birth             | 71   | 10.1       |          |          | 3.1     |          |          |
| Fresh fruits $\leq 2$ /week |      |            |          |          |         |          |          |
| Yes                         | 1259 | 12.2       | 4.776    | 0.029    | 4.8     | 5.393    | 0.02     |
| No                          | 566  | 16.1       |          |          | 7.7     |          |          |
| Dessert $\leq 2$ /week      |      |            |          |          |         |          |          |
| Yes                         | 887  | 12.4       | 1.315    | 0.252    | 5.2     | 0.477    | 0.49     |
| No                          | 938  | 14.3       |          |          | 6       |          |          |
| Breakfast $\leq 2$ /week    |      |            |          |          |         |          |          |
| Yes                         | 1673 | 13.9       | 1.758    | 0.185    | 5.8     | 0.475    | 0.491    |
| No                          | 149  | 11.1       |          |          | 4.8     |          |          |
| Fast food $\leq 2$ /week    |      |            |          |          |         |          |          |
| Yes                         | 264  | 7.6        | 2.786    | 0.095    | 7.6     | 0.703    | 0.402    |
| No                          | 1561 | 13.7       |          |          | 5.5     |          |          |
| Eat with concentration      |      |            |          |          |         |          |          |
| Yes                         | 1174 | 11.6       | 8.253    | 0.004    | 5.4     | 0.464    | 0.496    |
| No                          | 651  | 16.5       |          |          | 6.2     |          |          |
| Picky eater                 |      |            |          |          |         |          |          |
| Yes                         | 1133 | 14.8       | 4.851    | 0.028    | 6.7     | 4.876    | 0.027    |
| No                          | 692  | 11.1       |          |          | 4       |          |          |
| Exercise                    |      |            |          |          |         |          |          |
| Never                       | 451  | 15.9       | 3.28     | 0.194    | 4.2     | 2.31     | 0.315    |
| Sometimes                   | 478  | 12         |          |          | 6.6     |          |          |
| Often                       | 896  | 12.8       |          |          | 5.8     |          |          |
| Highest parental degree     |      |            |          |          |         |          |          |
| Primary school or low       | 95   | 8          | 4.688    | 0.196    | 8       | 1.322    | 0.724    |
| Junior high school          | 799  | 13         |          |          | 5.1     |          |          |
| Senior high school          | 468  | 15.8       |          |          | 6       |          |          |

|                        |      |      |       |       |     |       |       |  |
|------------------------|------|------|-------|-------|-----|-------|-------|--|
| University and above   | 463  | 12.7 |       |       | 5.7 |       |       |  |
| Sleep (hours/night)    |      |      |       |       |     |       |       |  |
| <8                     | 884  | 13.6 | 0.423 | 0.809 | 5.3 | 2.392 | 0.302 |  |
| ≥8                     | 861  | 13.3 |       |       | 5.6 |       |       |  |
| >10                    | 80   | 11   |       |       | 9.7 |       |       |  |
| Fatherly weight        |      |      |       |       |     |       |       |  |
| Normal                 | 827  | 15.5 | 5.575 | 0.018 | 7.6 | 9.426 | 0.002 |  |
| Overweight and obesity | 998  | 11.6 |       |       | 4.1 |       |       |  |
| Maternal weight        |      |      |       |       |     |       |       |  |
| Normal                 | 1099 | 15.2 | 7.504 | 0.006 | 5.5 | 0.06  | 0.807 |  |
| Overweight and obesity | 726  | 10.6 |       |       | 5.8 |       |       |  |

162 Note: *PR* (%), Prevalence rate

163 In order to facilitate regression analysis, we divided the participants into two groups:  
 164 underweight and normal; overweight and obese. Table 2 shows the univariate analysis  
 165 of correlates of overweight and obesity in adolescents. As is impressively  
 166 demonstrated in this table, the following factors all had a significant effect: gender,  
 167 age, birth history, the frequency of eating fruits, eating habits (eat with concentration,  
 168 picky eaters), parental weights ( $p < 0.05$ ). According to the results, we added all these  
 169 significant factors to a forward stepwise multivariate logistic regression model.

170 **Table 2**

171 **Univariate analysis of correlates of overweight and obesity in adolescents in Changchun**

| Variables | Wald $\chi^2$ | <i>p</i> | <i>OR</i> | 95% <i>CI</i> |
|-----------|---------------|----------|-----------|---------------|
| Gender    |               |          |           |               |
| Female    | 35.972        | <0.001   | 1         |               |
| Male      |               |          | 2.125     | 1.661-2.719   |
| Area      |               |          |           |               |
| Urban     | 1.288         | 0.256    | 1         |               |
| Rural     |               |          | 1.15      | 0.902-1.473   |
| Age       |               |          |           |               |
| <13       | 5.21          | 0.07     | 1         |               |
| 13-15     | 4.163         | 0.041    | 0.66      | 0.448-0.984   |
| >15       | 0.915         | 0.339    | 0.81      | 0.532-1.243   |

|                             |                        |        |       |       |             |
|-----------------------------|------------------------|--------|-------|-------|-------------|
| Birth history               |                        |        |       |       |             |
|                             | Full-term birth        | 9.756  | 0.008 | 1     |             |
|                             | Preterm birth          | 8.418  | 0.004 | 0.39  | 0.21-0.739  |
|                             | Post-term birth        | 1.58   | 0.209 | 0.63  | 0.312-1.29  |
| Fresh fruits $\leq 2$ /week |                        |        |       |       |             |
|                             | Yes                    | 8.571  | 0.003 | 1     |             |
|                             | No                     |        |       | 1.46  | 1.132-1.87  |
| Dessert $\leq 2$ /week      |                        |        |       |       |             |
|                             | Yes                    | 1.663  | 1.197 | 1     |             |
|                             | No                     |        |       | 1.17  | 0.921-1.493 |
| Breakfast $\leq 2$ /week    |                        |        |       |       |             |
|                             | Yes                    | 2.076  | 0.15  | 1.00  |             |
|                             | No                     |        |       | 0.79  | 0.571-1.089 |
| Fast food $\leq 2$ /week    |                        |        |       |       |             |
|                             | Yes                    | 1.978  | 0.16  | 1     |             |
|                             | No                     |        |       | 1.08  | 0.972-1.19  |
| Eat with concentration      |                        |        |       |       |             |
|                             | Yes                    | 7.303  | 0.007 | 1     |             |
|                             | No                     |        |       | 0.713 | 0.558-0.911 |
| Picky eater                 |                        |        |       |       |             |
|                             | Yes                    | 8.48   | 0.004 | 1     |             |
|                             | No                     |        |       | 0.68  | 0.526-0.882 |
| Exercise                    |                        |        |       |       |             |
|                             | Never                  | 0.601  | 0.74  | 1     |             |
|                             | Sometimes              | 0.45   | 0.502 | 0.89  | 0.638-1.246 |
|                             | Often                  | 0.491  | 0.484 | 0.90  | 0.672-1.207 |
| Highest parental degree     |                        |        |       |       |             |
|                             | Primary school or low  | 2.878  | 0.411 | 1     |             |
|                             | Junior high school     | 0.284  | 0.594 | 1.18  | 0.648-2.136 |
|                             | Senior high school     | 1.444  | 0.229 | 1.45  | 0.79-2.678  |
|                             | University and above   | 0.306  | 0.58  | 1.19  | 0.642-2.206 |
| Sleep (hours/night)         |                        |        |       |       |             |
|                             | <8                     | 0.074  | 0.964 | 1     |             |
|                             | $\geq 8$               | 0.004  | 0.952 | 0.99  | 0.776-1.27  |
|                             | >10                    | 0.061  | 0.805 | 1.08  | 0.598-1.938 |
| Fatherly weight             |                        |        |       |       |             |
|                             | Normal                 | 11.902 | 0.001 | 1     |             |
|                             | Overweight and obesity |        |       | 0.65  | 0.513-0.832 |
| Maternal weight             |                        |        |       |       |             |
|                             | Normal                 | 4.582  | 0.032 | 1     |             |
|                             | Overweight and obesity |        |       | 0.76  | 0.591-0.977 |

172

173 Table 3 shows the results of logistic regression models comparing the prevalence of  
 174 the potential risk factors: gender, age, birth history, the frequency of eating fruits,  
 175 eating habits (eat with concentration, picky eaters), parental weights. In this forward  
 176 stepwise multivariate logistic regression model, males were more likely to be  
 177 overweight and obese than females (OR=2.002, 95%CI: 1.557-2.573). Students aged  
 178 from 13-15 (OR=0.642, 95%CI: 0.428-0.962) were less likely to be overweight than  
 179 11-12 years old. Compared with full-term birth subjects, those who were preterm birth  
 180 (OR=0.442, 95%CI: 0.234-0.835) tended to be normal weight. Participants who ate  
 181 fruits less than twice a week (OR=1.335, 95%CI: 1.03-1.73) were 1.335 times more  
 182 likely to be overweight and obese. What's more, the prevalence of overweight would  
 183 be enhanced if students ate with concentration (OR=1.387, 95%CI: 1.077-1.788).  
 184 Picky eaters were much more likely to be overweight than the subjects who ate a  
 185 healthy diet (OR=0.682, 95%CI: 0.523-0.889), respectively.

186 **Table 3**187 **Multivariate regression analysis of correlates of overweight and obesity in**188 **Changchun**

| Variables | Wald $\chi^2$ | <i>p</i> | $\beta$ | SE    | OR    | 95% CI      |
|-----------|---------------|----------|---------|-------|-------|-------------|
| Gender    |               |          |         |       |       |             |
| Female    |               |          |         |       | 1     |             |
| Male      | 29.35         | <0.001   | 0.694   | 0.128 | 2.002 | 1.557-2.573 |
| Age       |               |          |         |       |       |             |
| <13       |               |          |         |       | 1     |             |
| 13-15     | 4.615         | 0.032    | -0.444  | 0.207 | 0.642 | 0.428-0.962 |
| >15       | 2.468         | 0.116    | -0.351  | 0.223 | 0.704 | 0.454-1.091 |

|                        |        |       |        |       |       |   |             |
|------------------------|--------|-------|--------|-------|-------|---|-------------|
| Birth history          |        |       |        |       |       |   |             |
| Full-term birth        |        |       |        |       |       | 1 |             |
| Preterm birth          | 6.321  | 0.012 | -0.816 | 0.325 | 0.442 |   | 0.234-0.835 |
| Post-term birth        | 1.354  | 0.245 | -0.43  | 0.369 | 0.651 |   | 0.316-1.342 |
| Fresh fruits $\leq 2$  |        |       |        |       |       |   |             |
| Yes                    |        |       |        |       |       | 1 |             |
| No                     | 4.761  | 0.029 | 0.289  | 0.132 | 1.335 |   | 1.03-1.73   |
| Eat with concentration |        |       |        |       |       |   |             |
| Yes                    |        |       |        |       |       | 1 |             |
| No                     | 6.409  | 0.011 | 0.327  | 0.129 | 1.387 |   | 1.077-1.788 |
| Picky eater            |        |       |        |       |       |   |             |
| Yes                    |        |       |        |       |       | 1 |             |
| No                     | 8.022  | 0.005 | -0.383 | 0.135 | 0.682 |   | 0.523-0.889 |
| Fatherly weight        |        |       |        |       |       |   |             |
| Normal                 |        |       |        |       |       | 1 |             |
| Overweight and obesity | 11.764 | 0.001 | -0.433 | 0.126 | 0.649 |   | 0.507-0.831 |

## 189 Discussion

190 To describe the epidemiology of overweight and obesity in Changchun city and  
 191 analyze the influence factors in adolescents, we conducted this survey of middle  
 192 school students aged 11–18 years from urban and rural areas and found that location,  
 193 gender and parental weight have a significant impact on a child's weight.

194 Based on the data, we found the prevalence of overweight was 12.7% (male 17.4%;  
 195 female 10.1%), and of obesity was 4.9% (male 8.8%; female 3.1%) among  
 196 adolescents in Changchun city, Jilin province. However, in recent studies, the overall  
 197 prevalence of obesity in school-aged children in Xi'an was 4.11%, and the rate of  
 198 overweight was 6.6% in Nanjing adolescents, which were both lower than data in  
 199 Changchun. This difference may be caused by sample size, sex, and age of the studied  
 200 population[17, 18]. In addition, demographics distribution and environmental factors



1  
2  
3  
4 201 are probable cause too[19]. As we all know, the economics in northeast China was  
5  
6  
7 202 less development compared with that in east and south China to some extent[20].  
8  
9  
10 203 Rates of overweight and obesity were also higher in rural areas in the north than in the  
11  
12  
13 204 south[21]. Depending on the season, people in the north might eat high-energy foods  
14  
15 205 to combat the cold, what is said “energy balance related behaviors [22, 23]”. In our  
16  
17  
18 206 data, boys were more often obese than girls, in general, which were in agreement with  
19  
20  
21 207 previous reports[23-26]. On the one hand, in traditional Chinese culture, the  
22  
23  
24 208 preference for boys may be the reason for the differences in diet, and older believe  
25  
26  
27 209 that fat boys are more powerful than thin ones. By contrast, girls with well-groomed  
28  
29  
30 210 and fit are more favored by Chinese society[27-29]. Girls, on the other hand, tend to  
31  
32  
33 211 be more concerned about their weight than boys.  
34  
35  
36 212 We also found that adolescents who ate few fruits in general and were picky about  
37  
38  
39 213 foods were more likely to be overweight and obese in our survey. According to the  
40  
41  
42 214 present cross-sectional observation, children who were picky about foods would  
43  
44  
45 215 prefer more fast food, fried food, sweet food and so on. Nowadays, several studies  
46  
47  
48 216 have considered that food intake is a primary factor that determines body  
49  
50  
51 217 weight[30-32]. Y. Li et al concluded that overweight Chinese children reported high  
52  
53  
54 218 energy and fat intakes, excessive intake of cooking oil might be one of the risk factors  
55  
56  
57 219 of overweight[33]. Consistent with a previous study in Tianjin[30], overweight  
58  
59  
60 220 students preferred significantly to more sweet foods and take-out food rather than  
221 their counterparts with normal weight. The result might be influenced by many

1  
2  
3  
4 222 elements, such as peer influence, food price, convenience or not, online influence and  
5  
6  
7 223 so on, based on recent report[34]. In order to decrease the fat rate, a series of  
8  
9  
10 224 interventions have been conducted such as controlling the TV time and increasing the  
11  
12 225 sport time.

13  
14  
15 226 In our research, we found that if fathers were overweight, adolescents were less likely  
16  
17 227 to be overweight, which was opposite to the previous conclusion[35-37]. Studies [25,  
18  
19 228 38]have found that the higher BMI in the father increased the risk of overweight/  
20  
21 229 obesity among males and females. However, the finding is not consistent across  
22  
23 230 studies. In a previous study, the researchers found that the relationship between  
24  
25 231 parents' and kids' BMI not existed when longitudinal analyses of changes in BMI  
26  
27 232 over four years were performed[39]. This may explain why a short period of periodic  
28  
29 233 surveys alone does not fully demonstrate a parent-child link to obesity, and we still  
30  
31 234 need a long-term research if we want to explore the relationship between the two  
32  
33 235 factors further. What's more, children's growing environment and living habits will  
34  
35 236 also affect their own obesity level, which will have an impact on our results; for  
36  
37 237 example, in order to adapt to the small groups in school, students always eat  
38  
39 238 unhealthy food with their peers[34]. Further prospective studies that assess both  
40  
41 239 energy expenditure and energy intake in children meanwhile are more likely to clarify  
42  
43 240 this question. In addition, the use of BMI to assess parental weight status may be a  
44  
45 241 limitation of this study, as BMI did not always reflect a person's body fat percentage,  
46  
47 242 nor did we take into account parental waist circumference in this survey[38].  
48  
49  
50  
51  
52  
53  
54  
55  
56  
57  
58  
59  
60

1  
2  
3  
4 243 There are several limitations to this study. First, the analysis results were restricted by  
5  
6  
7 244 the less sample size, and we interpolated missing values in the data resulting in  
8  
9  
10 245 random errors eventually. Second, the conclusion might seem a little limited in  
11  
12 246 assessing whether children were obese or not due to BMI, this single index and the  
13  
14  
15 247 potential bias. If we could analyze the risk factors of obesity in teenagers from  
16  
17  
18 248 multiple perspectives based on the height-for-age Z-score (HAZ), we might get a  
19  
20  
21 249 more accurate conclusion, which is also a problem we need to improve in the future.  
22  
23 250 Third, the contents of the questionnaire were most recalled by the parents or  
24  
25  
26 251 guardians, and there might be information bias and confounding bias in this survey.  
27  
28  
29 252 Fourth, our data came from six schools in Changchun, which was not representative  
30  
31  
32 253 of the specific circumstance in Jilin Province. Further research should be conducted to  
33  
34  
35 254 complete the conclusion.

## 255 **Conclusions**

256 To sum up, in this cross-section study, we found the prevalence of overweight and  
257 obesity among adolescents in Changchun, Jilin Province is relatively high compared  
258 with other cities such as Xi'an and Nanjing. Gender, age, birth history, diet habits,  
259 and parental weight were important factors for overweight and obesity in adolescents.  
260 Therefore, reasonable lifestyle and effective weight control are necessary condition to  
261 prevent from overweight or obese for adolescent. There are still several limitations in  
262 this study, we need to conduct more information accurately and more specific analysis

1  
2  
3  
4 263 on it. Further research should be conducted about the health of adolescents in China  
5  
6  
7 264 and further intervening measures should be tailored on decreasing the prevalence of  
8  
9  
10 265 obesity.

## 11 12 13 266 **Acknowledgements**

14  
15  
16  
17 267 Thanks to all those who helped with the investigation and the participants.

## 18 19 20 21 268 **Footnotes**

22  
23  
24  
25  
26 269 **Contributors:** RD, CK and HY conceived the study, participated in the design of the  
27  
28 270 study. HY, JJ and XL collected data. RD carried out the measurements, analyzed the  
29  
30 271 data and drafted the manuscript. XY and BZ participated in the coordination of the  
31  
32 272 study and interpreted the data. WB and YL revised the manuscript. All authors have  
33  
34 273 approved the final article.

35  
36  
37  
38  
39 274 **Funding:** This study was supported by the National Key Research and Development  
40  
41 275 Program (2016YFC1300100) and the National Natural Science Foundation of China  
42  
43 276 (Grant Number: 81300062).

44  
45  
46  
47 277 **Competing interests:** None declared.

48  
49  
50 278 **Ethical approval:** The investigation was conducted by the First Hospital of Jilin  
51  
52 279 University in April 2016, our data collected from the questionnaire in the survey as  
53  
54 280 well. The study was approved by the ethics committee of the First Hospital of Jilin  
55  
56  
57 281 University (Reference Number: 2013-031). The investigation has received informed

282 consent from students and parents.

283 **Data sharing:** No additional data are available.

## 284 **References**

- 285 1 Worldwide trends in body-mass index, underweight, overweight, and obesity from  
286 1975 to 2016: a pooled analysis of 2416 population-based measurement  
287 studies in 128.9 million children, adolescents, and adults. *Lancet (London,  
288 England)* 2017;390(10113):2627-42. doi: 10.1016/s0140-6736(17)32129-3  
289 [published Online First: 2017/10/17]
- 290 2 Global Health Observatory Data Repository. 2017. Available  
291 online:<http://apps.who.int/gho/data/view.main.BMIPLUS2C10-19v?lang=en>  
292 (accessed on 29 September 2017)
- 293 3 Jiang Y, Wang J, Wu S, et al. Association between Take-Out Food Consumption and  
294 Obesity among Chinese University Students: A Cross-Sectional Study.  
295 *International journal of environmental research and public health* 2019;16(6)  
296 doi: 10.3390/ijerph16061071 [published Online First: 2019/04/03]
- 297 4 Rong Y, Niu CY, Zhao HX, et al. Association of Adolescent Obesity with Nonalcoholic  
298 Fatty Liver Disease and Related Risk Factors in Xi 'an, China. *Annals of  
299 Hepatology Official Journal of the Mexican Association of Hepatology*  
300 2018;17(1):85-91.
- 301 5 Lisan Q, Van Sloten T, Marques Vidal P, et al. Association of Positive Airway  
302 Pressure Prescription With Mortality in Patients With Obesity and Severe  
303 Obstructive Sleep Apnea: The Sleep Heart Health Study. *JAMA  
304 otolaryngology-- head & neck surgery* 2019 doi: 10.1001/jamaoto.2019.0281  
305 [published Online First: 2019/04/12]
- 306 6 Lai SH, Tsai YW, Chen YC, et al. Obesity, hyperhomocysteinaemia and risk of  
307 chronic kidney disease: a population-based study. *Family Practice* 2017;35(3)
- 308 7 Sabanayagam C, Wong TY, Liao J, et al. Body mass index and preclinical kidney  
309 disease in Indian adults aged 40 years and above without chronic kidney  
310 disease. *Clinical and experimental nephrology* 2014;18(6):919-24. doi:  
311 10.1007/s10157-014-0945-6 [published Online First: 2014/02/15]
- 312 8 Addo PN, Nyarko KM, Sackey SO, et al. Prevalence of obesity and overweight and  
313 associated factors among financial institution workers in Accra Metropolis,  
314 Ghana: a cross sectional study. *BMC research notes* 2015;8:599. doi:  
315 10.1186/s13104-015-1590-1 [published Online First: 2015/10/27]
- 316 9 Sun H, Ma Y, Han D, et al. Prevalence and trends in obesity among China's children  
317 and adolescents, 1985-2010. *PloS one* 2014;9(8):e105469. doi:  
318 10.1371/journal.pone.0105469 [published Online First: 2014/08/21]

- 1  
2  
3 319 10 Zhang X, Zhang F, Yang J, et al. Prevalence of overweight and obesity among  
4 320 primary school-aged children in Jiangsu Province, China, 2014-2017. *PloS one*  
5 321 2018;13(8):e0202681. doi: 10.1371/journal.pone.0202681 [published Online  
6 322 First: 2018/08/24]
- 7  
8  
9 323 11 Ma Y, Peng L, Kou C, et al. Associations of Overweight, Obesity and Related  
10 324 Factors with Sleep-Related Breathing Disorders and Snoring in Adolescents: A  
11 325 Cross-Sectional Survey. *International journal of environmental research and*  
12 326 *public health* 2017;14(2) doi: 10.3390/ijerph14020194 [published Online  
13 327 First: 2017/02/18]
- 14  
15 328 12 O'Brien BC, Harris IB, Beckman TJ, et al. Standards for reporting qualitative  
16 329 research: a synthesis of recommendations. *Academic medicine : journal of*  
17 330 *the Association of American Medical Colleges* 2014;89(9):1245-51. doi:  
18 331 10.1097/acm.0000000000000388 [published Online First: 2014/07/01]
- 19  
20 332 13 Cole TJ, Bellizzi MC, Flegal KM, et al. Establishing a standard definition for child  
21 333 overweight and obesity worldwide: international survey. *BMJ (Clinical*  
22 334 *research ed)* 2000;320(7244):1240-3. doi: 10.1136/bmj.320.7244.1240  
23 335 [published Online First: 2000/05/08]
- 24  
25 336 14 Zhou L, Zeng Q, Jin S, et al. The impact of changes in dietary knowledge on adult  
26 337 overweight and obesity in China. *PloS one* 2017;12(6):e0179551. doi:  
27 338 10.1371/journal.pone.0179551 [published Online First: 2017/06/24]
- 28  
29 339 15 Wang H, Zhai F. Programme and policy options for preventing obesity in China.  
30 340 *Obesity Reviews* 2013;14(S2):134-40. doi: 10.1111/obr.12106
- 31  
32 341 16 Wang R, Zhang P, Gao C, et al. Prevalence of overweight and obesity and some  
33 342 associated factors among adult residents of northeast China: a  
34 343 cross-sectional study. *BMJ open* 2016;6(7):e010828. doi:  
35 344 10.1136/bmjopen-2015-010828 [published Online First: 2016/07/28]
- 36  
37 345 17 Xu F, Li J, Ware RS, et al. Associations of television viewing time with excess body  
38 346 weight among urban and rural high-school students in regional mainland  
39 347 China. *Public health nutrition* 2008;11(9):891-6. doi:  
40 348 10.1017/s1368980007001280 [published Online First: 2007/11/17]
- 41  
42 349 18 Yi X, Yin C, Chang M, et al. Prevalence and risk factors of obesity among  
43 350 school-aged children in Xi'an, China. *European journal of pediatrics*  
44 351 2012;171(2):389-94. doi: 10.1007/s00431-011-1566-7 [published Online First:  
45 352 2011/09/14]
- 46  
47 353 19 Hu L, Huang X, You C, et al. Prevalence of overweight, obesity, abdominal obesity  
48 354 and obesity-related risk factors in southern China. *PloS one*  
49 355 2017;12(9):e0183934. doi: 10.1371/journal.pone.0183934 [published Online  
50 356 First: 2017/09/15]
- 51  
52 357 20 Li P, Jiang R, Li L, et al. Prevalence and risk factors of metabolic syndrome in  
53 358 school adolescents of northeast China. *Journal of pediatric endocrinology &*  
54 359 *metabolism : JPEM* 2014;27(5-6):525-32. doi: 10.1515/jpem-2013-0336  
55 360 [published Online First: 2014/05/14]
- 56  
57  
58  
59  
60

- 1  
2  
3 361 21 Reynolds K, Gu D, Whelton PK, et al. Prevalence and Risk Factors of Overweight  
4 362 and Obesity in China\*. *Obesity* 2012;15(1):10-18.
- 5 363 22 Zhuo Q, Wang Z, Piao J, et al. Geographic variation in the prevalence of  
6 364 overweight and economic status in Chinese adults. *The British journal of*  
7 365 *nutrition* 2009;102(3):413-8. doi: 10.1017/s0007114508184732 [published  
8 366 Online First: 2009/01/14]
- 9 367 23 Jia P, Xue H, Zhang J, et al. Time Trend and Demographic and Geographic  
10 368 Disparities in Childhood Obesity Prevalence in China-Evidence from Twenty  
11 369 Years of Longitudinal Data. *International journal of environmental research*  
12 370 *and public health* 2017;14(4) doi: 10.3390/ijerph14040369 [published Online  
13 371 First: 2017/04/01]
- 14 372 24 Jia P, Li M, Xue H, et al. School environment and policies, child eating behavior  
15 373 and overweight/obesity in urban China: the childhood obesity study in China  
16 374 megacities. *International journal of obesity (2005)* 2017;41(5):813-19. doi:  
17 375 10.1038/ijo.2017.2 [published Online First: 2017/01/12]
- 18 376 25 Shafaghi K, Shariff ZM, Taib MN, et al. Parental body mass index is associated with  
19 377 adolescent overweight and obesity in Mashhad, Iran. *Asia Pacific journal of*  
20 378 *clinical nutrition* 2014;23(2):225-31. doi: 10.6133/apjcn.2014.23.2.11  
21 379 [published Online First: 2014/06/06]
- 22 380 26 Zhang Y, Zhao J, Chu Z, et al. Increasing prevalence of childhood overweight and  
23 381 obesity in a coastal province in China. *Pediatric obesity* 2016;11(6):e22-e26.  
24 382 doi: 10.1111/ijpo.12070 [published Online First: 2015/09/26]
- 25 383 27 Li J, Lei J, Wen S, et al. Sex disparity and perception of obesity/overweight by  
26 384 parents and grandparents. *Paediatrics & child health* 2014;19(7):e113-6. doi:  
27 385 10.1093/pch/19.7.e113 [published Online First: 2014/10/22]
- 28 386 28 Zhang J, Wang H, Wang Z, et al. Prevalence and stabilizing trends in overweight  
29 387 and obesity among children and adolescents in China, 2011-2015. *BMC public*  
30 388 *health* 2018;18(1):571. doi: 10.1186/s12889-018-5483-9 [published Online  
31 389 First: 2018/05/03]
- 32 390 29 Zhai L, Dong Y, Bai Y, et al. Trends in obesity, overweight, and malnutrition among  
33 391 children and adolescents in Shenyang, China in 2010 and 2014: a multiple  
34 392 cross-sectional study. *BMC public health* 2017;17(1):151. doi:  
35 393 10.1186/s12889-017-4072-7 [published Online First: 2017/02/06]
- 36 394 30 Andegiorgish AK, Wang J, Zhang X, et al. Prevalence of overweight, obesity, and  
37 395 associated risk factors among school children and adolescents in Tianjin,  
38 396 China. *European journal of pediatrics* 2012;171(4):697-703. doi:  
39 397 10.1007/s00431-011-1636-x [published Online First: 2011/12/14]
- 40 398 31 Liu J, Hay J, Faight BE, et al. Family eating and activity habits, diet quality and  
41 399 pre-adolescent overweight and obesity. *Public health* 2012;126(6):532-4. doi:  
42 400 10.1016/j.puhe.2012.02.012 [published Online First: 2012/05/09]
- 43 401 32 An R. Diet quality and physical activity in relation to childhood obesity.  
44 402 *International journal of adolescent medicine and health* 2017;29(2) doi:



- 1  
2  
3 403 10.1515/ijamh-2015-0045 [published Online First: 2015/09/10]  
4 404 33 Li Y, Zhai F, Yang X, et al. Determinants of childhood overweight and obesity in  
5 405 China. *The British journal of nutrition* 2007;97(1):210-5. doi:  
6 406 10.1017/s0007114507280559 [published Online First: 2007/01/16]  
7  
8 407 34 Watts AW, Lovato CY, Barr SI, et al. A qualitative study exploring how school and  
9 408 community environments shape the food choices of adolescents with  
10 409 overweight/obesity. *Appetite* 2015;95:360-7. doi:  
11 410 10.1016/j.appet.2015.07.022 [published Online First: 2015/07/28]  
12  
13 411 35 Naess M, Holmen TL, Langaas M, et al. Intergenerational Transmission of  
14 412 Overweight and Obesity from Parents to Their Adolescent Offspring - The  
15 413 HUNT Study. *PloS one* 2016;11(11):e0166585. doi:  
16 414 10.1371/journal.pone.0166585 [published Online First: 2016/11/17]  
17  
18 415 36 Tu AW, Watts AW, Masse LC. Parent-Adolescent Patterns of Physical Activity,  
19 416 Sedentary Behaviors and Sleep Among a Sample of Overweight and Obese  
20 417 Adolescents. *Journal of physical activity & health* 2015;12(11):1469-76. doi:  
21 418 10.1123/jpah.2014-0270 [published Online First: 2015/01/27]  
22  
23 419 37 Brennan L, Walkley J, Wilks R. Parent- and adolescent-reported barriers to  
24 420 participation in an adolescent overweight and obesity intervention. *Obesity*  
25 421 *(Silver Spring, Md)* 2012;20(6):1319-24. doi: 10.1038/oby.2011.358  
26 422 [published Online First: 2011/12/24]  
27  
28 423 38 Jiang MH, Yang Y, Guo XF, et al. Association between child and adolescent obesity  
29 424 and parental weight status: a cross-sectional study from rural North China.  
30 425 *The Journal of international medical research* 2013;41(4):1326-32. doi:  
31 426 10.1177/0300060513480081 [published Online First: 2013/06/19]  
32  
33 427 39 Maffeis C, Talamini G, Tato L. Influence of diet, physical activity and parents'  
34 428 obesity on children's adiposity: a four-year longitudinal study. *International*  
35 429 *journal of obesity and related metabolic disorders : journal of the*  
36 430 *International Association for the Study of Obesity* 1998;22(8):758-64.  
37 431 [published Online First: 1998/09/02]  
38 432  
39 433  
40  
41  
42  
43  
44  
45  
46  
47  
48  
49  
50  
51  
52  
53  
54  
55  
56  
57  
58  
59  
60



# Reporting checklist for qualitative study.

Based on the SRQR guidelines.

## Instructions to authors

Complete this checklist by entering the page numbers from your manuscript where readers will find each of the items listed below.

Your article may not currently address all the items on the checklist. Please modify your text to include the missing information. If you are certain that an item does not apply, please write "n/a" and provide a short explanation.

Upload your completed checklist as an extra file when you submit to a journal.

In your methods section, say that you used the SRQR reporting guidelines, and cite them as:

O'Brien BC, Harris IB, Beckman TJ, Reed DA, Cook DA. Standards for reporting qualitative research: a synthesis of recommendations. *Acad Med.* 2014;89(9):1245-1251.

|                                            | Reporting Item                                                                                                                                                                                                                                                                                                                                                                                                                                                                                                                                                                                                                                          | Page Number |
|--------------------------------------------|---------------------------------------------------------------------------------------------------------------------------------------------------------------------------------------------------------------------------------------------------------------------------------------------------------------------------------------------------------------------------------------------------------------------------------------------------------------------------------------------------------------------------------------------------------------------------------------------------------------------------------------------------------|-------------|
| <b>Title</b>                               |                                                                                                                                                                                                                                                                                                                                                                                                                                                                                                                                                                                                                                                         |             |
|                                            | <a href="#">#1</a> Concise description of the nature and topic of the study identifying the study as qualitative or indicating the approach (e.g. ethnography, grounded theory) or data collection methods (e.g. interview, focus group) is recommended                                                                                                                                                                                                                                                                                                                                                                                                 | 1           |
| <b>Abstract</b>                            |                                                                                                                                                                                                                                                                                                                                                                                                                                                                                                                                                                                                                                                         |             |
|                                            | <a href="#">#2</a> Summary of the key elements of the study using the abstract format of the intended publication; typically includes background, purpose, methods, results and conclusions                                                                                                                                                                                                                                                                                                                                                                                                                                                             | 2-3         |
| <b>Introduction</b>                        |                                                                                                                                                                                                                                                                                                                                                                                                                                                                                                                                                                                                                                                         |             |
| Problem formulation                        | <a href="#">#3</a> Description and significance of the problem / phenomenon studied: review of relevant theory and empirical work; problem statement                                                                                                                                                                                                                                                                                                                                                                                                                                                                                                    | 3-4         |
| Purpose or research question               | <a href="#">#4</a> Purpose of the study and specific objectives or questions                                                                                                                                                                                                                                                                                                                                                                                                                                                                                                                                                                            |             |
| <b>Methods</b>                             |                                                                                                                                                                                                                                                                                                                                                                                                                                                                                                                                                                                                                                                         |             |
| Qualitative approach and research paradigm | <a href="#">#5</a> Qualitative approach (e.g. ethnography, grounded theory, case study, phenomenology, narrative research) and guiding theory if appropriate; identifying the research paradigm (e.g. postpositivist, constructivist / interpretivist) is also recommended; rationale. The rationale should briefly discuss the justification for choosing that theory, approach, method or technique rather than other options available; the assumptions and limitations implicit in those choices and how those choices influence study conclusions and transferability. As appropriate the rationale for several items might be discussed together. | 4-5         |

|    |                                                                                                    |                     |                                                                                                                                                                                                                                                                                                                                                             |       |
|----|----------------------------------------------------------------------------------------------------|---------------------|-------------------------------------------------------------------------------------------------------------------------------------------------------------------------------------------------------------------------------------------------------------------------------------------------------------------------------------------------------------|-------|
| 1  | <i>Researcher characteristics and reflexivity</i>                                                  | <a href="#">#6</a>  | <i>Researchers' characteristics that may influence the research, including personal attributes, qualifications / experience, relationship with participants, assumptions and / or presuppositions; potential or actual interaction between researchers' characteristics and the research questions, approach, methods, results and / or transferability</i> | 5-6   |
| 2  |                                                                                                    |                     |                                                                                                                                                                                                                                                                                                                                                             |       |
| 3  |                                                                                                    |                     |                                                                                                                                                                                                                                                                                                                                                             |       |
| 4  |                                                                                                    |                     |                                                                                                                                                                                                                                                                                                                                                             |       |
| 5  |                                                                                                    |                     |                                                                                                                                                                                                                                                                                                                                                             |       |
| 6  |                                                                                                    |                     |                                                                                                                                                                                                                                                                                                                                                             |       |
| 7  | <i>Context</i>                                                                                     | <a href="#">#7</a>  | <i>Setting / site and salient contextual factors; rationale</i>                                                                                                                                                                                                                                                                                             | 5-6   |
| 8  |                                                                                                    |                     |                                                                                                                                                                                                                                                                                                                                                             |       |
| 9  | <i>Sampling strategy</i>                                                                           | <a href="#">#8</a>  | <i>How and why research participants, documents, or events were selected; criteria for deciding when no further sampling was necessary (e.g. sampling saturation); rationale</i>                                                                                                                                                                            | 4-5   |
| 10 |                                                                                                    |                     |                                                                                                                                                                                                                                                                                                                                                             |       |
| 11 |                                                                                                    |                     |                                                                                                                                                                                                                                                                                                                                                             |       |
| 12 | <i>Ethical issues pertaining to human subjects</i>                                                 | <a href="#">#9</a>  | <i>Documentation of approval by an appropriate ethics review board and participant consent, or explanation for lack thereof; other confidentiality and data security issues</i>                                                                                                                                                                             | 5-7   |
| 13 |                                                                                                    |                     |                                                                                                                                                                                                                                                                                                                                                             |       |
| 14 |                                                                                                    |                     |                                                                                                                                                                                                                                                                                                                                                             |       |
| 15 |                                                                                                    |                     |                                                                                                                                                                                                                                                                                                                                                             |       |
| 16 | <i>Data collection methods</i>                                                                     | <a href="#">#10</a> | <i>Types of data collected; details of data collection procedures including (as appropriate) start and stop dates of data collection and analysis, iterative process, triangulation of sources / methods, and modification of procedures in response to evolving study findings; rationale</i>                                                              | 4-6   |
| 17 |                                                                                                    |                     |                                                                                                                                                                                                                                                                                                                                                             |       |
| 18 |                                                                                                    |                     |                                                                                                                                                                                                                                                                                                                                                             |       |
| 19 |                                                                                                    |                     |                                                                                                                                                                                                                                                                                                                                                             |       |
| 20 |                                                                                                    |                     |                                                                                                                                                                                                                                                                                                                                                             |       |
| 21 |                                                                                                    |                     |                                                                                                                                                                                                                                                                                                                                                             |       |
| 22 | <i>Data collection instruments and technologies</i>                                                | <a href="#">#11</a> | <i>Description of instruments (e.g. interview guides, questionnaires) and devices (e.g. audio recorders) used for data collection; if / how the instruments(s) changed over the course of the study</i>                                                                                                                                                     | 4     |
| 23 |                                                                                                    |                     |                                                                                                                                                                                                                                                                                                                                                             |       |
| 24 |                                                                                                    |                     |                                                                                                                                                                                                                                                                                                                                                             |       |
| 25 |                                                                                                    |                     |                                                                                                                                                                                                                                                                                                                                                             |       |
| 26 |                                                                                                    |                     |                                                                                                                                                                                                                                                                                                                                                             |       |
| 27 | <i>Units of study</i>                                                                              | <a href="#">#12</a> | <i>Number and relevant characteristics of participants, documents, or events included in the study; level of participation (could be reported in results)</i>                                                                                                                                                                                               | 4     |
| 28 |                                                                                                    |                     |                                                                                                                                                                                                                                                                                                                                                             |       |
| 29 |                                                                                                    |                     |                                                                                                                                                                                                                                                                                                                                                             |       |
| 30 | <i>Data processing</i>                                                                             | <a href="#">#13</a> | <i>Methods for processing data prior to and during analysis, including transcription, data entry, data management and security, verification of data integrity, data coding, and anonymisation / deidentification of excerpts</i>                                                                                                                           | 6     |
| 31 |                                                                                                    |                     |                                                                                                                                                                                                                                                                                                                                                             |       |
| 32 |                                                                                                    |                     |                                                                                                                                                                                                                                                                                                                                                             |       |
| 33 |                                                                                                    |                     |                                                                                                                                                                                                                                                                                                                                                             |       |
| 34 |                                                                                                    |                     |                                                                                                                                                                                                                                                                                                                                                             |       |
| 35 | <i>Data analysis</i>                                                                               | <a href="#">#14</a> | <i>Process by which inferences, themes, etc. were identified and developed, including the researchers involved in data analysis; usually references a specific paradigm or approach; rationale</i>                                                                                                                                                          | 6     |
| 36 |                                                                                                    |                     |                                                                                                                                                                                                                                                                                                                                                             |       |
| 37 |                                                                                                    |                     |                                                                                                                                                                                                                                                                                                                                                             |       |
| 38 |                                                                                                    |                     |                                                                                                                                                                                                                                                                                                                                                             |       |
| 39 |                                                                                                    |                     |                                                                                                                                                                                                                                                                                                                                                             |       |
| 40 | <i>Techniques to enhance trustworthiness</i>                                                       | <a href="#">#15</a> | <i>Techniques to enhance trustworthiness and credibility of data analysis (e.g. member checking, audit trail, triangulation); rationale</i>                                                                                                                                                                                                                 | 6     |
| 41 |                                                                                                    |                     |                                                                                                                                                                                                                                                                                                                                                             |       |
| 42 |                                                                                                    |                     |                                                                                                                                                                                                                                                                                                                                                             |       |
| 43 | <b>Results/findings</b>                                                                            |                     |                                                                                                                                                                                                                                                                                                                                                             |       |
| 44 |                                                                                                    |                     |                                                                                                                                                                                                                                                                                                                                                             |       |
| 45 | <i>Syntheses and interpretation</i>                                                                | <a href="#">#16</a> | <i>Main findings (e.g. interpretations, inferences, and themes); might include development of a theory or model, or integration with prior research or theory</i>                                                                                                                                                                                           | 7-12  |
| 46 |                                                                                                    |                     |                                                                                                                                                                                                                                                                                                                                                             |       |
| 47 |                                                                                                    |                     |                                                                                                                                                                                                                                                                                                                                                             |       |
| 48 |                                                                                                    |                     |                                                                                                                                                                                                                                                                                                                                                             |       |
| 49 | <i>Links to empirical data</i>                                                                     | <a href="#">#17</a> | <i>Evidence (e.g. quotes, field notes, text excerpts, photographs) to substantiate analytic findings</i>                                                                                                                                                                                                                                                    | n/a   |
| 50 |                                                                                                    |                     |                                                                                                                                                                                                                                                                                                                                                             |       |
| 51 |                                                                                                    |                     |                                                                                                                                                                                                                                                                                                                                                             |       |
| 52 | <b>Discussion</b>                                                                                  |                     |                                                                                                                                                                                                                                                                                                                                                             |       |
| 53 |                                                                                                    |                     |                                                                                                                                                                                                                                                                                                                                                             |       |
| 54 | <i>Integration with prior work, implications, transferability and contribution(s) to the field</i> | <a href="#">#18</a> | <i>Short summary of main findings; explanation of how findings and conclusions connect to, support, elaborate on, or challenge conclusions of earlier scholarship; discussion of scope of application / generalizability; identification of unique contributions(s) to scholarship in a discipline or field</i>                                             | 12-15 |
| 55 |                                                                                                    |                     |                                                                                                                                                                                                                                                                                                                                                             |       |
| 56 |                                                                                                    |                     |                                                                                                                                                                                                                                                                                                                                                             |       |
| 57 |                                                                                                    |                     |                                                                                                                                                                                                                                                                                                                                                             |       |
| 58 |                                                                                                    |                     |                                                                                                                                                                                                                                                                                                                                                             |       |
| 59 |                                                                                                    |                     |                                                                                                                                                                                                                                                                                                                                                             |       |

|    |                              |                     |                                                                                                                       |    |
|----|------------------------------|---------------------|-----------------------------------------------------------------------------------------------------------------------|----|
| 1  | <i>Limitations</i>           | <a href="#">#19</a> | <i>Trustworthiness and limitations of findings</i>                                                                    | 15 |
| 2  |                              |                     |                                                                                                                       |    |
| 3  | <b>Other</b>                 |                     |                                                                                                                       |    |
| 4  |                              |                     |                                                                                                                       |    |
| 5  | <i>Conflicts of interest</i> | <a href="#">#20</a> | <i>Potential sources of influence of perceived influence on study conduct and conclusions; how these were managed</i> | 16 |
| 6  |                              |                     |                                                                                                                       |    |
| 7  |                              |                     |                                                                                                                       |    |
| 8  |                              |                     |                                                                                                                       |    |
| 9  | <i>Funding</i>               | <a href="#">#21</a> | <i>Sources of funding and other support; role of funders in data collection, interpretation and reporting</i>         | 16 |
| 10 |                              |                     |                                                                                                                       |    |
| 11 |                              |                     |                                                                                                                       |    |

12 None The SRQR checklist is distributed with permission of Wolters Kluwer © 2014 by the Association of American Medical Colleges. This  
13 checklist can be completed online using <https://www.goodreports.org/>, a tool made by the [EQUATOR Network](#) in collaboration with  
14 [Penelope.ai](#)  
15

16  
17  
18  
19  
20  
21  
22  
23  
24  
25  
26  
27  
28  
29  
30  
31  
32  
33  
34  
35  
36  
37  
38  
39  
40  
41  
42  
43  
44  
45  
46  
47  
48  
49  
50  
51  
52  
53  
54  
55  
56  
57  
58  
59  
60

For peer review only

# BMJ Open

## Prevalence and correlates of overweight and obesity among adolescents in northeastern China: a cross-sectional study

|                                 |                                                                                                                                                                                                                                                                                                                                                                                                                                                                                                                                                                                                                                                                                                                                                                                                                                                                                                                                                               |
|---------------------------------|---------------------------------------------------------------------------------------------------------------------------------------------------------------------------------------------------------------------------------------------------------------------------------------------------------------------------------------------------------------------------------------------------------------------------------------------------------------------------------------------------------------------------------------------------------------------------------------------------------------------------------------------------------------------------------------------------------------------------------------------------------------------------------------------------------------------------------------------------------------------------------------------------------------------------------------------------------------|
| Journal:                        | <i>BMJ Open</i>                                                                                                                                                                                                                                                                                                                                                                                                                                                                                                                                                                                                                                                                                                                                                                                                                                                                                                                                               |
| Manuscript ID                   | bmjopen-2020-036820.R1                                                                                                                                                                                                                                                                                                                                                                                                                                                                                                                                                                                                                                                                                                                                                                                                                                                                                                                                        |
| Article Type:                   | Original research                                                                                                                                                                                                                                                                                                                                                                                                                                                                                                                                                                                                                                                                                                                                                                                                                                                                                                                                             |
| Date Submitted by the Author:   | 24-Mar-2020                                                                                                                                                                                                                                                                                                                                                                                                                                                                                                                                                                                                                                                                                                                                                                                                                                                                                                                                                   |
| Complete List of Authors:       | Duan, Ruixin; Jilin University School of Public Health, Department of Epidemiology and Biostatistics; Jilin University First Hospital, Pulmonary Division & Sleep Center<br>Kou, Changgui; Jilin University School of Public Health, Department of Epidemiology and Biostatistics<br>Jie, Jing; Jilin University First Hospital, Pulmonary Division & Sleep Center<br>bai , wei; Jilin University School of Public Health, Department of Epidemiology and Biostatistics<br>Lan, Xiaoxin; Jilin University First Hospital, Pulmonary Division & Sleep Center<br>Li, Yuanyuan; Jilin University School of Public Health, Department of Epidemiology and Biostatistics<br>Yu, Xiao; Jilin University School of Public Health, Department of Epidemiology and Biostatistics<br>Zhu, Bo; Jilin University School of Public Health, Department of Epidemiology and Biostatistics<br>Yuan, Haibo; Jilin University First Hospital, Pulmonary Division & Sleep Center |
| <b>Primary Subject Heading</b>: | Epidemiology                                                                                                                                                                                                                                                                                                                                                                                                                                                                                                                                                                                                                                                                                                                                                                                                                                                                                                                                                  |
| Secondary Subject Heading:      | Public health                                                                                                                                                                                                                                                                                                                                                                                                                                                                                                                                                                                                                                                                                                                                                                                                                                                                                                                                                 |
| Keywords:                       | PUBLIC HEALTH, EPIDEMIOLOGY, Risk management < HEALTH SERVICES ADMINISTRATION & MANAGEMENT                                                                                                                                                                                                                                                                                                                                                                                                                                                                                                                                                                                                                                                                                                                                                                                                                                                                    |
|                                 |                                                                                                                                                                                                                                                                                                                                                                                                                                                                                                                                                                                                                                                                                                                                                                                                                                                                                                                                                               |

SCHOLARONE™  
Manuscripts



I, the Submitting Author has the right to grant and does grant on behalf of all authors of the Work (as defined in the below author licence), an exclusive licence and/or a non-exclusive licence for contributions from authors who are: i) UK Crown employees; ii) where BMJ has agreed a CC-BY licence shall apply, and/or iii) in accordance with the terms applicable for US Federal Government officers or employees acting as part of their official duties; on a worldwide, perpetual, irrevocable, royalty-free basis to BMJ Publishing Group Ltd ("BMJ") its licensees and where the relevant Journal is co-owned by BMJ to the co-owners of the Journal, to publish the Work in this journal and any other BMJ products and to exploit all rights, as set out in our [licence](#).

The Submitting Author accepts and understands that any supply made under these terms is made by BMJ to the Submitting Author unless you are acting as an employee on behalf of your employer or a postgraduate student of an affiliated institution which is paying any applicable article publishing charge ("APC") for Open Access articles. Where the Submitting Author wishes to make the Work available on an Open Access basis (and intends to pay the relevant APC), the terms of reuse of such Open Access shall be governed by a Creative Commons licence – details of these licences and which [Creative Commons](#) licence will apply to this Work are set out in our licence referred to above.

Other than as permitted in any relevant BMJ Author's Self Archiving Policies, I confirm this Work has not been accepted for publication elsewhere, is not being considered for publication elsewhere and does not duplicate material already published. I confirm all authors consent to publication of this Work and authorise the granting of this licence.

1 Prevalence and correlates of overweight and obesity  
2 among adolescents in northeastern China: a  
3 cross-sectional study

4 Ruixin Duan<sup>1, 2</sup>, Changgui Kou<sup>1</sup>, Jing Jie<sup>2</sup>, Wei Bai<sup>1</sup>, Xiaoxin Lan<sup>2</sup>, Yuanyuan Li<sup>1</sup>,  
5 Xiao Yu<sup>1</sup>, Bo Zhu<sup>1</sup>, Haibo Yuan<sup>2\*</sup>

6  
7  
8 <sup>1</sup> Department of Epidemiology and Biostatistics, School of Public Health, Jilin  
9 University, 1163 Xinmin Street, Changchun, 130021, Jilin province, China;

10 <sup>2</sup> Pulmonary Division & Sleep Center, The First Hospital of Jilin University,  
11 Changchun, 130021, Jilin Province, China.

12  
13  
14  
15  
16 \*Corresponding Author:

17 Haibo Yuan<sup>2\*</sup>

18 The First Hospital of Jilin University, Changchun, 130021, Jilin Province, China

19 Email address: hyuan@jlu.edu.cn

20 Word count: 3592

21  
22

## 23 Abstract

24 **Objectives:** To estimate the prevalence of overweight/obesity among adolescents and  
25 to evaluate the associated factors in this group in Changchun City, northeastern China.

26 **Methods:** A cross-sectional study of 1955 adolescents aged 11–18 years was  
27 conducted in Changchun City, using stratified cluster sampling. Parents and  
28 caregivers of children completed the questionnaires as requested without objection;  
29 the questionnaire included demographic characteristics and anthropometric  
30 parameters. Univariate and multivariate logistic regression analyses were performed  
31 to analyze the relationship between overweight /obesity and related factors.

32 **Results:** In total, the prevalence of overweight was 12.7% (male 17.4%; female  
33 10.1%), and the prevalence of obesity was 4.9% (male 8.8%; female 3.1%) in  
34 Changchun, Jilin Province. The prevalence of overweight and obesity was higher in  
35 males than that in females ( $P < 0.001$ ). Multivariate logistic regression showed that  
36 overweight and obesity were significantly associated with sex (OR=1.912, 95% CI:  
37 1.481-2.469), weekly frequency of fruit consumption (OR=1.413, 95% CI:  
38 1.085-1.840), picky eating (OR=0.691, 95% CI: 0.528-0.902), slowness in eating  
39 (OR=1.373, 95% CI: 1.060-1.778), paternal weight (OR=0.665, 95% CI: 0.516-0.857)  
40 and maternal weight (OR=0.723, 95% CI: 0.523-0.999).

41 **Conclusion:** The prevalence of overweight and obesity among adolescents in  
42 Changchun was high in recent years. The prevalence of overweight and obesity  
43 among males was higher than that among females. Sex, dietary habits (weekly

1  
2  
3  
4 44 frequency of fruit consumption, picky eating and slowness in eating) and parental  
5  
6  
7 45 weight were important factors for overweight and obesity in adolescents. Further  
8  
9  
10 46 research should be conducted on the health of adolescents in China and further  
11  
12 47 intervention measures should be implemented to reduce the prevalence of  
13  
14  
15 48 overweight/obesity.

16  
17  
18 49 **Keywords:** overweight; obesity; adolescent; association  
19  
20

## 21 50 **Strengths and limitations of this study**

- 22  
23  
24  
25  
26 51 ● There have been few studies on obesity among adolescents in North China, so we  
27  
28 52 studied the risk factors for obesity in adolescents.
- 29  
30  
31 53 ● The strength of this study is the precise physical measurement, which improved  
32  
33 54 the validity of the results.
- 34  
35  
36 55 ● The analysis results might contain some confounding bias due to the  
37  
38 56 cross-sectional nature of the data.
- 39  
40  
41 57 ● The results were from Changchun, the capital of Jilin Province and therefore  
42  
43 58 cannot be representative of the specific circumstances in all of China.
- 44  
45  
46 59 ● The results were mainly discussed in relation to previous Chinese studies,  
47  
48 60 combined with Chinese geographical environment, dietary patterns and  
49  
50 61 adolescent lifestyle.

## 51 52 53 54 55 56 57 62 **Introduction**



1  
2  
3  
4 63 The prevalence of obesity has increased dramatically among children, adolescents and  
5  
6  
7 64 adults worldwide in recent decades [1]. Overall, the global proportion of adolescents  
8  
9  
10 65 with obesity has increased significantly from just 4% in 1975 to just over 18% in  
11  
12 66 2016[2]. There is compelling evidence revealing a significantly higher proportion of  
13  
14  
15 67 overweight or obese adolescents in recent years, which has reached alarming levels.  
16  
17 68 Recently, scholars have conducted many studies on overweight and obesity.  
18  
19  
20 69 Overweight and obesity are predisposing factors for many chronic diseases, such as  
21  
22  
23 70 type 2 diabetes, cardiovascular diseases, respiratory diseases, musculoskeletal  
24  
25  
26 71 disorders, and various types of cancer[3]. Yan R et al. found an association of  
27  
28  
29 72 adolescent obesity with nonalcoholic fatty liver disease (NAFLD) and revealed that  
30  
31  
32 73 the incidence of NAFLD increased with increasing body weight[4]. Lisan Q et al.  
33  
34  
35 74 compared patients with obesity and severe obstructive sleep apnoea (OSA) with and  
36  
37  
38 75 without prescription of positive airway pressure (PAP) therapy and found that  
39  
40  
41 76 participants with PAP prescriptions had a higher BMI (Body mass index) than  
42  
43  
44 77 participants not prescribed PAP [5] . It has been estimated that overweight and obesity  
45  
46  
47 78 are the fifth leading cause of death worldwide, accounting for nearly 3.4 million  
48  
49  
50 79 deaths annually[6]. In addition, obesity is considered a risk factor for the development  
51  
52  
53 80 of chronic kidney disease [7]. In this context, the American Medical Association  
54  
55  
56 81 classified obesity as a disease to get physicians to pay more attention to the condition  
57  
58  
59 82 [8].  
60

1  
2  
3  
4 83 In China, the largest developing country, nearly one-third of adolescents were  
5  
6  
7 84 overweight or obese in 2016, and the obesity prevalence rate increased from 0.10% in  
8  
9  
10 85 1976 to 8.50% in 2016. Sun HP found that the prevalence of obesity and of  
11  
12 86 overweight and obesity combined was 8.1% and 19.2%, respectively, among children  
13  
14  
15 87 and adolescents at the age of 7–18 [9]. Zhang XY reported that the prevalence rates of  
16  
17 88 overweight and obesity among primary school children were 15.2% and 11.7%,  
18  
19  
20 89 respectively, in Jiangsu Province[10]. Therefore, it is of key importance to understand  
21  
22  
23 90 the risk factors for overweight and obesity to prevent adolescents from developing the  
24  
25  
26 91 disease.

27  
28  
29 92 We investigated the physical condition of adolescents aged 11-18 years from six  
30  
31  
32 93 middle schools in Changchun which is the capital of Jilin Province. The aim of the  
33  
34  
35 94 current study was to reveal the prevalence of overweight and obesity and to analyze  
36  
37  
38 95 various associated factors among adolescents with overweight and obesity in  
39  
40  
41 96 Changchun, Jilin.

## 42 43 97 **Methods**

### 44 45 46 47 98 **Subjects**

48  
49  
50  
51 99 The study sample comprised middle and high school students from six middle schools  
52  
53  
54 100 (three in urban areas and three in rural areas), selected randomly using stratified  
55  
56  
57 101 cluster sampling, in Changchun City, the capital of Jilin Province in Northeast China.  
58  
59  
60 102 Overall, 1955 students aged 11–18 years were included in this cross-sectional survey;

1  
2  
3  
4 103 subjects with overweight/obesity due to known metabolic and endocrine diseases  
5  
6  
7 104 were excluded. Students were also excluded if they had mental or physical  
8  
9  
10 105 impairments severe enough to cause abnormal behaviors, including congenital  
11  
12 106 disease, intellectual disability, and a psychiatric disorder [11]. The study was  
13  
14  
15 107 approved by the ethics committee of the First Hospital of Jilin University (Reference  
16  
17  
18 108 Number: 2013-031). The investigation received informed consent from students and  
19  
20  
21 109 parents. We used the STROBE checklist in this study.  
22  
23

## 24 110 **Data collection**

25  
26  
27  
28 111 The study was carried out by the First Hospital of Jilin University in April 2016. The  
29  
30  
31 112 project was named “Effect and mechanism of weight loss on upper airway  
32  
33 113 collapsibility in obese patients with OSAS” and studied the associations of  
34  
35  
36 114 overweight, obesity and related factors with sleep-related breathing disorders and  
37  
38  
39 115 snoring in adolescents. In this database, we focused on the relevant indicators of  
40  
41  
42 116 overweight and obesity in adolescents and analyzed the risk factors for obesity in  
43  
44  
45 117 adolescents. The interviewers from the First Hospital of Jilin University helped  
46  
47  
48 118 parents or guardians complete the questionnaire and provided the data. The  
49  
50  
51 119 questionnaire included demographic characteristics (age, sex, area, dietary habits,  
52  
53 120 sleep, exercise, highest parental education, birth history, BMI classification, paternal  
54  
55 121 weight and maternal weight), anthropometric parameters (weight, height) and a  
56  
57  
58 122 paediatric sleep questionnaire- the Sleep-Related Breathing Disorder (PSQ-SRBD).  
59  
60

1  
2  
3  
4 123 The data about sleep duration and dietary habits (frequency of fresh fruits  
5  
6  
7 124 consumption, frequency of dessert consumption, frequency of breakfast consumption,  
8  
9  
10 125 frequency of fast food consumption, slowness in eating, picky eating) were selected  
11  
12 126 from the PSQ-SRBD scale according to various reports[12-14] about adolescent  
13  
14  
15 127 obesity.

## 128 **Key variables**

129 Body mass index (BMI) is used here as an indicator of overweight and obesity in  
130 adolescents and adults. Weight category was defined using age- and sex- specific  
131 BMI cutoff points specifically developed for the Chinese adolescent population [15].  
132 We used the 85<sup>th</sup> and 95<sup>th</sup> percentiles to define overweight and obesity in adolescents.  
133 Therefore, BMI values of 24 and 28 were used as cut-off points  
134 for overweight and obesity, both for males and females aged 18 years, which were  
135 consistent with Chinese adults. In our study, parental overweight was divided into 2  
136 groups: normal (BMI<24) and overweight or obese (BMI≥24) [14, 16]. Parents and  
137 caregivers provided information on adolescents' weight (to the nearest 1 kg) and  
138 height (to the nearest 1 cm). Overall children were classified by age into 3 groups  
139 (<13 years, 13-15 years, >15 years), by region into 2 groups (urban, rural) and by sex  
140 into 2 groups (male, female). Participants who slept less than 8 hours 3 days a week  
141 were classified as 'sleep <8 h', and those who slept more than 10 hours 3 days a week  
142 were defined as 'sleep >10 h'[17]. Birth history was divided into 3 groups: preterm

1  
2  
3  
4 143 birth (infants born alive before 37 weeks of pregnancy), full-term birth (infants born  
5  
6  
7 144 alive after 37 completed weeks to less than 42 completed weeks) and post-term birth  
8  
9 145 (infants born alive at 42 completed weeks or after) [18]. Parental educational level  
10  
11  
12 146 was divided into 4 groups: primary school or lower (including those who had never  
13  
14  
15 147 attended school and those with elementary schooling only), junior high school, senior  
16  
17  
18 148 high school (including those with 3 years of secondary vocational schooling) and  
19  
20  
21 149 university or above [17]. According to the contents of the questionnaire, we classified  
22  
23  
24 150 the participants' eating habits. According to the Food Guide Pagoda [19], fruit intake  
25  
26  
27 151 should be 200-350 g/d, and sugar intake should be no more than 50 g/d, so we used  
28  
29  
30 152 eating "fresh fruits two or more days per week (350 g/d)", "dessert two or more days  
31  
32  
33 153 per week", "breakfast two or more days per week", and "fast food two or more days  
34  
35  
36 154 per week" as cut-offs. Participants who were classified as "picky eating" were defined  
37  
38  
39 155 as adolescents who had selectivity for a particular kind of food [20]. "Slowness in  
40  
41  
42 156 eating" was defined as adolescents with higher masticatory performance and who ate  
43  
44  
45 157 slowly [21]. Groups were formed according to the number of exercise days (aerobic,  
46  
47  
48 158 strength training or both for at least 30 minutes a day), including never (participate in  
49  
50  
51 159 sports  $\leq 1$  day per week), sometimes (participate in sports 2-3 days per week) and  
52  
53  
54 160 often (participate in sports  $\geq 4$  days per week) [22, 23].

## 161 **Statistical analysis**

162 Data input was performed using Epidata 3.1, and statistical analysis was performed

1  
2  
3  
4 163 using SPSS 24.0. Frequency distributions are used to characterize subjects, and  
5  
6  
7 164 percentage data are used to report prevalence. The relationship between each factor  
8  
9  
10 165 and the adolescents' weight status was reflected by  $\chi^2$  tests and univariate and  
11  
12 166 multivariate logistic regression. In univariate analysis, when  $P < 0.10$ , significant  
13  
14  
15 167 correlation factors were included in a forward stepwise multivariate logistic  
16  
17  
18 168 regression to exclude confounding factors. In all analyses, a two-tailed  $P$  value  $< 0.05$   
19  
20  
21 169 was considered statistically significant. Since the database was manually collated,  
22  
23  
24 170 some variables in the database had missing values, which resulted in waste and bias of  
25  
26  
27 171 data resources. The missing value was numeric, and the data were approximately  
28  
29  
30 172 normally distributed. The mean interpolation method was adopted in this study.  
31  
32 173 Therefore, we used the "replace missing value" function in SPSS 24.0 and selected  
33  
34 174 the "mean of nearby points" method to interpolate the missing values.

### 37 175 **Data availability**

38  
39  
40  
41 176 Data referenced in this study are available in the project titled "Effect and mechanism  
42  
43  
44 177 of weight loss on upper airway collapsibility in obese patients with OSAS". We  
45  
46  
47 178 selected a portion of the data from the database, including body measurements of  
48  
49  
50 179 adolescents from six middle schools in Changchun City. The data that support the  
51  
52  
53 180 findings of this study are available on request from the corresponding author [HY].  
54  
55  
56 181 The data are not publicly available because they contain information that could  
57  
58 182 compromise research participant privacy or consent.  
59  
60

## 183 **Patient and public involvement**

184 The interviewers from the First Hospital of Jilin University helped parents or  
185 guardians complete the questionnaire and provided the data. The adolescents were not  
186 involved in the design, recruitment or conduction of the study.

## 187 **Results**

188 On the basis of the inclusion and exclusion criteria, we chose 1955 adolescents from  
189 Changchun, and of these adolescents, 1825 were finally analyzed in this study.  
190 Participants with missing BMI values were excluded from the study. Since the survey  
191 was already completed, we were unable to verify the source of data errors, so we  
192 deleted data with missing BMI values. According to the analysis of the frequency  
193 distribution, we found that there were 837 boys and 988 girls included; the median  
194 age of the students was 15.30 years, ranging from 11 to 18 years; of all these subjects,  
195 42.9% were from rural regions and 57.1% were from urban regions; and most of the  
196 subjects were Han Chinese, accounting for 98.2%, with only a few participants with  
197 minority ethnicities.

198 According to the worldwide BMI classification, the overall prevalence of overweight  
199 was 12.7% (male 17.4%; female 10.1%), and the prevalence of obesity was 4.9%  
200 (male 8.8%; female 3.1%) in Changchun City, Jilin Province (Table 1). The  
201 overweight and obese rates were both higher in males than that in females ( $P < 0.001$ ).  
202 A higher prevalence of overweight was found in subjects whose ages ranged from

11-12 years, and the prevalence of obesity was higher in the age group from 13-15 years ( $P=0.008$ ). Children from urban areas showed a significantly higher proportion of overweight. Full-term birth subjects had a higher prevalence of overweight than others ( $P=0.014$ ). In addition, students' dietary habits, such as those who ate fruits less than twice a week ( $P=0.029$ ), ate slowly ( $P=0.004$ ) and those who were picky ( $P=0.028$ ) had significant differences in overweight in the study. Paternal weight ( $P=0.018$ ) and maternal weight ( $P=0.006$ ) also had an effect on the children's weight.

**Table 1**

**Prevalence of overweight and obesity according to demographic characteristics**

| Variables                   | n    | Overweight      |        | Obesity       |        |
|-----------------------------|------|-----------------|--------|---------------|--------|
|                             |      | PR (%)          | p      | PR (%)        | p      |
| Sex                         |      |                 |        |               |        |
| Male                        | 837  | 17.4(14.9-20.3) | <0.001 | 8.8(6.9-11.2) | <0.001 |
| Female                      | 988  | 10.1 (8.3-12.2) |        | 3.1(2.2-4.5)  |        |
| Area                        |      |                 |        |               |        |
| Urban                       | 1042 | 14.4(12.4-16.7) | 0.14   | 5.6(4.2-7.3)  | 0.863  |
| Rural                       | 783  | 12(9.8-14.5)    |        | 5.8(4.3-7.8)  |        |
| Age                         |      |                 |        |               |        |
| <13                         | 168  | 19.3(13.9-26.1) | 0.008  | 5.1(2.5-10.3) | 0.816  |
| 13-15                       | 1157 | 11.6(9.8-13.6)  |        | 5.9(4.6-7.5)  |        |
| >15                         | 500  | 15.5(12.5-19.0) |        | 5.2(3.4-7.7)  |        |
| Birth history               |      |                 |        |               |        |
| Full-term birth             | 1621 | 14.2(12.5-16.0) | 0.014  | 6.0(4.9-7.4)  | 0.285  |
| Preterm birth               | 133  | 5.4(2.6-11.0)   |        | 3.2(1.2-8.2)  |        |
| Post-term birth             | 71   | 10.1(4.9-19.8)  |        | 3.1(0.8-11.7) |        |
| Fruit $\leq$ 2 times/week   |      |                 |        |               |        |
| Yes                         | 1259 | 12.2(10.5-14.2) | 0.029  | 4.8(3.7-6.2)  | 0.02   |
| No                          | 566  | 16.1(13.2-19.5) |        | 7.7(5.6-10.4) |        |
| Dessert $\leq$ 2 times/week |      |                 |        |               |        |
| Yes                         | 887  | 12.4(10.4-14.8) | 0.252  | 5.2(3.9-7.0)  | 0.49   |
| No                          | 938  | 14.3(12.1-16.7) |        | 6.0(4.6-7.9)  |        |
| Breakfast $\leq$ 2          |      |                 |        |               |        |



|                            |                         |      |                 |       |               |       |
|----------------------------|-------------------------|------|-----------------|-------|---------------|-------|
| times/week                 |                         |      |                 |       |               |       |
|                            | Yes                     | 1478 | 13.9(12.2-15.8) | 0.185 | 5.8(4.7-7.3)  | 0.491 |
|                            | No                      | 347  | 11.1(8.2-15.0)  |       | 4.8(2.9-7.9)  |       |
| Fast food $\leq$ 2         |                         |      |                 |       |               |       |
| times/week                 |                         |      |                 |       |               |       |
|                            | Yes                     | 264  | 10.0(6.8-14.3)  | 0.095 | 5.4(3.2-9.1)  | 0.402 |
|                            | No                      | 1561 | 13.9(12.3-15.8) |       | 5.7(4.6-7.1)  |       |
| Slowness in eating         |                         |      |                 |       |               |       |
|                            | Yes                     | 1174 | 16.5(13.8-19.7) | 0.004 | 6.2(4.5-8.5)  | 0.496 |
|                            | No                      | 651  | 11.6(9.9-13.6)  |       | 5.4(4.1-6.9)  |       |
| Picky eating               |                         |      |                 |       |               |       |
|                            | Yes                     | 1133 | 14.8(12.8-17.1) | 0.028 | 6.7(5.3-8.4)  | 0.027 |
|                            | No                      | 692  | 11.1(8.9-13.7)  |       | 4.0(2.7-5.9)  |       |
| Exercise                   |                         |      |                 |       |               |       |
|                            | Never                   | 451  | 15.9(12.7-19.6) | 0.194 | 4.2(2.6-6.7)  | 0.315 |
|                            | Sometimes               | 478  | 12(9.3-15.3)    |       | 6.6(4.6-9.4)  |       |
|                            | Often                   | 896  | 12.8(10.7-15.2) |       | 5.8(4.4-7.7)  |       |
| Highest parental education |                         |      |                 |       |               |       |
|                            | Primary school or lower | 95   | 8.0(3.8-15.8)   | 0.196 | 8.0(3.8-15.8) | 0.724 |
|                            | Junior high school      | 799  | 13.0(10.8-15.6) |       | 5.1(3.7-7.1)  |       |
|                            | Senior high school      | 468  | 15.8(12.7-19.5) |       | 6.0(4.1-8.8)  |       |
|                            | University or above     | 463  | 12.7(9.9-16.2)  |       | 5.7(3.8-8.4)  |       |
| Sleep (hours/night)        |                         |      |                 |       |               |       |
|                            | <8                      | 884  | 13.6(11.5-16.1) | 0.809 | 5.3(3.9-7.2)  | 0.302 |
|                            | $\geq$ 8                | 861  | 13.3(11.1-15.8) |       | 5.6(4.2-7.5)  |       |
|                            | >10                     | 80   | 11.0(5.6-20.4)  |       | 9.7(4.7-19.0) |       |
| Paternal weight            |                         |      |                 |       |               |       |
|                            | Normal                  | 827  | 15.4(13.1-18.1) | 0.018 | 7.6(6.0-9.8)  | 0.002 |
|                            | Ow or ob                | 998  | 11.6(9.6-13.7)  |       | 3.8(2.7-5.4)  |       |
| Maternal weight            |                         |      |                 |       |               |       |
|                            | Normal                  | 1099 | 14.8(13.0-16.8) | 0.006 | 5.6(4.4-7.0)  | 0.807 |
|                            | Ow or ob                | 726  | 8.5(6.1-11.7)   |       | 5.8(3.9-8.7)  |       |

212 Note: *PR* (%), Prevalence rate; Ow or ob, Overweight or obese

213 To facilitate regression analysis, we divided the participants into two groups:

214 underweight and normal and overweight and obese. Table 2 shows the univariate

215 analysis of correlates of overweight and obesity in adolescents. As impressively

216 demonstrated in this table, the following factors all showed significant differences  
 217 between two groups: sex, age, birth history, frequency of eating fruits, eating habits  
 218 (slowness in eating, picky eating), and parental weights ( $P < 0.05$ ). According to the  
 219 results, we added all these significant factors to a forward stepwise multivariate  
 220 logistic regression model.

221

222 **Table 2**223 **Univariate analysis of correlates of overweight and obesity in adolescents in Changchun**

| Variables                        | <i>p</i> | <i>OR</i> | 95% <i>CI</i> |
|----------------------------------|----------|-----------|---------------|
| Sex                              |          |           |               |
| Female                           | <0.001   | 1         |               |
| Male                             |          | 2.125     | 1.661-2.719   |
| Area                             |          |           |               |
| Urban                            | 0.256    | 1         |               |
| Rural                            |          | 1.150     | 0.902-1.473   |
| Age                              |          |           |               |
| <13                              | 0.070    | 1         |               |
| 13-15                            | 0.041    | 0.664     | 0.448-0.984   |
| >15                              | 0.339    | 0.813     | 0.532-1.243   |
| Birth history                    |          |           |               |
| Full-term birth                  | 0.008    | 1         |               |
| Preterm birth                    | 0.004    | 0.394     | 0.21-0.739    |
| Post-term birth                  | 0.209    | 0.634     | 0.312-1.29    |
| Fresh fruits $\leq 2$ times/week |          |           |               |
| Yes                              | 0.003    | 1         |               |
| No                               |          | 1.455     | 1.132-1.87    |
| Dessert $\leq 2$ times/week      |          |           |               |
| Yes                              | 1.197    | 1         |               |
| No                               |          | 1.172     | 0.921-1.493   |
| Breakfast $\leq 2$ times /week   |          |           |               |
| Yes                              | 0.15     | 1         |               |
| No                               |          | 0.789     | 0.571-1.089   |
| Fast food $\leq 2$ times /week   |          |           |               |
| Yes                              | 0.16     | 1         |               |

|                            |                         |       |       |             |
|----------------------------|-------------------------|-------|-------|-------------|
|                            | No                      |       | 1.080 | 0.972-1.19  |
| Slowness in eating         | Yes                     | 0.007 | 1     |             |
|                            | No                      |       | 0.713 | 0.558-0.911 |
| Picky eating               | Yes                     | 0.004 | 1     |             |
|                            | No                      |       | 0.691 | 0.526-0.882 |
| Exercise                   | Never                   | 0.74  | 1     |             |
|                            | Sometimes               | 0.502 | 0.892 | 0.638-1.246 |
|                            | Often                   | 0.484 | 0.901 | 0.672-1.207 |
| Highest parental education | Primary school or lower | 0.411 | 1     |             |
|                            | Junior high school      | 0.594 | 1.176 | 0.648-2.136 |
|                            | Senior high school      | 0.229 | 1.454 | 0.79-2.678  |
|                            | University or above     | 0.58  | 1.190 | 0.642-2.206 |
| Sleep (hours/night)        | <8                      | 0.964 | 1     |             |
|                            | ≥8                      | 0.952 | 0.992 | 0.776-1.27  |
|                            | >10                     | 0.805 | 1.077 | 0.598-1.938 |
| Paternal weight            | Normal                  | 0.001 | 1     |             |
|                            | Ow or ob                |       | 0.639 | 0.513-0.832 |
| Maternal weight            | Normal                  | 0.011 | 1     |             |
|                            | Ow or ob                |       | 0.666 | 0.487-0.912 |

224 Note: Ow or ob, Overweight or obesity

225 Table 3 shows the results of logistic regression models comparing the prevalence of  
 226 the potential risk factors: sex, age, birth history, frequency of eating fruits, dietary  
 227 habits (slowness in eating, picky eating) and parental weight. In this forward stepwise  
 228 multivariate logistic regression model, males were more likely to be overweight and  
 229 obese than females (OR=1.912, 95% CI: 1.481-2.496). Students aged 13-15 years  
 230 (OR=0.634, 95% CI: 0.420-0.957) were less likely to be overweight than those aged  
 231 11-12 years. Compared with full-term birth, preterm birth (OR=0.450, 95% CI:

0.238-0.851) was associated with normal weight. Participants who ate fruit more than twice a week (OR=1.413, 95% CI: 1.085-1.840) were more likely to be overweight or obese. Moreover, the prevalence of overweight was lower in students who ate slowly (OR=1.373, 95% CI: 1.060-1.778). Students who were picky (OR=0.691, 95%CI: 0.528-0.902) were much more likely to be overweight than the subjects who ate a healthy diet.

### Table 3

#### Multivariate regression analysis of correlates of overweight and obesity in

#### Changchun

| Variables                        | <i>p</i> | $\beta$ | SE    | OR    | 95% CI      |
|----------------------------------|----------|---------|-------|-------|-------------|
| Sex                              |          |         |       |       |             |
| Female                           |          |         |       | 1     |             |
| Male                             | <0.001   | 0.648   | 0.130 | 1.912 | 1.481-2.496 |
| Age                              |          |         |       |       |             |
| <13                              |          |         |       | 1     |             |
| 13-15                            | 0.030    | -0.455  | 0.210 | 0.634 | 0.420-0.957 |
| >15                              | 0.121    | -0.351  | 0.226 | 0.704 | 0.452-1.097 |
| Birth history                    |          |         |       |       |             |
| Full-term birth                  |          |         |       | 1     |             |
| Preterm birth                    | 0.014    | -0.798  | 0.325 | 0.450 | 0.238-0.851 |
| Post-term birth                  | 0.337    | -0.355  | 0.370 | 0.701 | 0.339-1.448 |
| Fresh fruits $\leq$ 2 times/week |          |         |       |       |             |
| Yes                              |          |         |       | 1     |             |
| No                               | 0.010    | 0.346   | 0.135 | 1.413 | 1.085-1.840 |
| Slowness in eating               |          |         |       |       |             |
| Yes                              |          |         |       | 1     |             |
| No                               | 0.016    | 0.317   | 0.132 | 1.373 | 1.060-1.778 |
| Picky eating                     |          |         |       |       |             |
| Yes                              |          |         |       | 1     |             |
| No                               | 0.007    | -0.370  | 0.137 | 0.691 | 0.528-0.902 |
| Paternal weight                  |          |         |       |       |             |

|  |                 |       |        |       |       |             |
|--|-----------------|-------|--------|-------|-------|-------------|
|  | Normal          |       |        |       | 1     |             |
|  | Ow or ob        | 0.002 | -0.408 | 0.130 | 0.665 | 0.507-0.831 |
|  | Maternal weight |       |        |       |       |             |
|  | Normal          |       |        |       |       |             |
|  | Ow or ob        | 0.049 | -0.324 | 0.165 | 0.723 | 0.523-0.999 |

242 Note: Ow or ob, Overweight or obese

## 243 Discussion

244 To describe the epidemiology of overweight and obesity in Changchun City and  
 245 analyze the influencing factors in adolescents, we conducted this survey of middle  
 246 school students aged 11–18 years from urban and rural areas. We found that sex,  
 247 dietary habits and parental weight had a significant impact on the children's weight.

248 Based on the data, we found that the prevalence of overweight was 12.7% (male  
 249 17.4%; female 10.1%) and that the prevalence of obesity was 4.9% (male 8.8%;  
 250 female 3.1%) among adolescents in Changchun City, Jilin Province. However, in  
 251 recent studies, the overall prevalence of obesity in school-aged children in Xi'an was  
 252 4.11%, and the rate of overweight was 6.6% among Nanjing adolescents; these rates  
 253 were both lower than the corresponding rates in Changchun. This difference may be  
 254 caused by the sample size, sex, and age of the studied population [24, 25]. In addition,  
 255 demographic distribution and environmental factors are probable factors [26]. The  
 256 economy in northeast China is less developed than that in east and south China to  
 257 some extent [27]. Rates of overweight and obesity in rural areas were also higher in  
 258 the north than that in the south [28]. Depending on the season, people in the north  
 259 might eat high-energy foods to combat the cold, which is referred to “energy balance

1  
2  
3  
4 260 related behaviors [29, 30]". In our data, boys were more often obese than girls, in  
5  
6  
7 261 general, which was in agreement with previous Chinese reports [30-32]. A Swedish  
8  
9 262 report [33] predicted that there was an alarming increase in the prevalence of  
10  
11  
12 263 overweight and obesity among adolescent boys, which was consistent with our  
13  
14  
15 264 finding. On the one hand, in traditional Chinese culture, the preference for boys may  
16  
17  
18 265 be the reason for the differences in diet, and the elderly believe that fat boys are more  
19  
20  
21 266 powerful than thin boys. On the other hand, well-groomed and fit girls are more  
22  
23  
24 267 favored by Chinese society [34-36]. Girls also tend to be more concerned about their  
25  
26  
27 268 weight than boys.

28  
29 269 We also found that adolescents who were picky, ate more fruits in general and ate  
30  
31  
32 270 quickly were more likely to be overweight or obese according to our survey. In recent  
33  
34  
35 271 reports [37, 38], a greater fruit intake was a protective factor against overweight,  
36  
37  
38 272 which was opposite of our result. Based on the results of our study, it was reasonable  
39  
40  
41 273 to speculate that the children were already full in addition to the excessive intake of  
42  
43  
44 274 fruits with high sugar content. However, the heavy study demand in China makes the  
45  
46  
47 275 children fail to consume the extra energy through exercise, thus leading to the  
48  
49  
50 276 possibility of being overweight.

51  
52  
53 277 According to the present cross-sectional study [39], food preference was an  
54  
55  
56 278 independent risk factor for overweight among children. It is known that children who  
57  
58  
59 279 had selectivity for a particular kind of food would prefer more fast food, snacks, and  
60  
280 sugary beverage [40] and fewer fruits and vegetables [41]. However, the frequency of

1  
2  
3  
4 281 dessert and fast food consumption had no significant effect in our study, perhaps  
5  
6  
7 282 because the data were provided by parents or guardians who provided an inaccurate  
8  
9  
10 283 account of how often their children ate sweets and fast food. Currently, several studies  
11  
12 284 have considered that food intake is a primary factor that determines body weight  
13  
14  
15 285 [42-44]. Y Li et al. concluded that excessive intake of cooking oil might be one of the  
16  
17  
18 286 risk factors for overweight [22]. Consistent with a previous study in Tianjin [42],  
19  
20  
21 287 overweight students preferred significantly more sweet foods and take-out food than  
22  
23  
24 288 their counterparts with normal weight. The result might be influenced by many  
25  
26  
27 289 elements, such as peer influence, food price, convenience, and online influence and so  
28  
29  
30 290 on, based on a recent report[45]. To decrease the prevalence of overweight and  
31  
32  
33 291 obesity, a series of interventions have been implemented, such as controlling TV time  
34  
35  
36 292 and increasing sport time.  
37  
38  
39 293 In our research, we found that if fathers and mothers were overweight, adolescents  
40  
41  
42 294 were less likely to be overweight, which was the opposite of the previous conclusions  
43  
44  
45 295 [46-48]. Studies [49, 50]have found that a higher BMI of the father increased the risk  
46  
47  
48 296 of overweight/ obesity among males and females. However, this finding was not  
49  
50  
51 297 consistent across studies. In a previous study, the researchers found that the  
52  
53  
54 298 relationship between parents' and children's BMI did not exist when longitudinal  
55  
56  
57 299 analyses of changes in BMI over four years were performed [51]. This may explain  
58  
59  
60 300 why a short period of periodic surveys alone does not fully demonstrate a parent-child  
301 link to obesity, and we still need long-term research to further explore the relationship

1  
2  
3  
4 302 between the two factors. Moreover, children's growing environment and living habits  
5  
6  
7 303 will also affect their own obesity level, which will have an impact on our results [45].  
8  
9  
10 304 Further prospective studies that assess both energy expenditure and energy intake in  
11  
12 305 children are more likely to clarify this concept. In addition, the use of BMI to assess  
13  
14  
15 306 parental weight status may be a limitation of this study, as BMI does not always  
16  
17  
18 307 reflect a person's body fat percentage, and we did not take into account parental waist  
19  
20 308 circumference in this survey[49].  
21  
22  
23 309 There are several limitations to this study. First, the analysis results were restricted by  
24  
25  
26 310 the small sample size, and we interpolated missing values in the data, potentially  
27  
28  
29 311 resulting in random errors. Second, the conclusion might seem slightly limited in  
30  
31 312 regard to assessing whether children were obese or not based on the value of BMI,  
32  
33  
34 313 which is a single index and may have potential for bias. If we could analyze the risk  
35  
36  
37 314 factors for obesity in teenagers from multiple perspectives based on the height-for-age  
38  
39  
40 315 Z-score (HAZ), we might obtain a more accurate conclusion, which is also a problem  
41  
42  
43 316 we need to address in the future. Third, the contents of the questionnaire were most  
44  
45  
46 317 recalled by the parents or guardians, and there might be information bias and  
47  
48  
49 318 confounding bias in this survey. Fourth, our data came from six schools in  
50  
51  
52 319 Changchun, which was not representative of the specific circumstances in Jilin  
53  
54  
55 320 Province. Further research should be conducted to validate the conclusion.  
56

## 57 **Conclusions**

58  
59  
60



1  
2  
3  
4 322 In summary, in this cross-sectional study, we found that the prevalence of overweight  
5  
6  
7 323 and obesity among adolescents in Changchun, Jilin Province was high. Sex, age, birth  
8  
9  
10 324 history, dietary habits, and parental weight were important factors for overweight and  
11  
12  
13 325 obesity in adolescents. Therefore, reasonable lifestyle and effective weight control are  
14  
15  
16 326 necessary to prevent overweight and obesity in adolescents. There are still several  
17  
18  
19 327 limitations in this study, and we need to obtain more accurate information and  
20  
21  
22 328 perform more specific analysis. Further research should be conducted on the health of  
23  
24  
25 329 adolescents in China and further intervention measures should be implemented to  
26  
27  
28 330 decrease the prevalence of overweight and obesity.

## 30 331 **Acknowledgements**

32  
33  
34 332 Thanks to all those who helped with the investigation and the participants.

## 35 36 37 333 **Footnotes**

38  
39  
40  
41  
42 334 **Contributors:** RD, CK and HY conceived the study, participated in the design of the  
43  
44  
45 335 study. HY, JJ and XL collected data. RD carried out the measurements, analyzed the  
46  
47  
48 336 data and drafted the manuscript. XY and BZ participated in the coordination of the  
49  
50  
51 337 study and interpreted the data. WB and YL revised the manuscript. All authors have  
52  
53  
54 338 approved the final article.

55  
56 339 **Funding:** This study was supported by the National Key Research and Development  
57  
58  
59 340 Program (2016YFC1300100) and the National Natural Science Foundation of China  
60

341 (Grant Number: 81300062).

342 **Competing interests:** None declared.

343 **Ethical approval:** The investigation was conducted by the First Hospital of Jilin  
344 University in April 2016, our data collected from the questionnaire in the survey as  
345 well. The study was approved by the ethics committee of the First Hospital of Jilin  
346 University (Reference Number: 2013-031). The investigation has received informed  
347 consent from students and parents.

348 **Data sharing:** Data referenced in this study are available in the project titled “Effect  
349 and mechanism of weight loss on upper airway collapsibility in obese patients with  
350 OSAS”. We selected a portion of the data from the database, including body  
351 measurements of adolescents from six middle schools in Changchun City. The data  
352 that support the findings of this study are available on request from the corresponding  
353 author [HY]. The data are not publicly available because they contain information that  
354 could compromise research participant privacy or consent.

## 355 **References**

- 356 1 Worldwide trends in body-mass index, underweight, overweight, and obesity from  
357 1975 to 2016: a pooled analysis of 2416 population-based measurement  
358 studies in 128.9 million children, adolescents, and adults. *Lancet (London,  
359 England)* 2017;390(10113):2627-42. doi: 10.1016/s0140-6736(17)32129-3  
360 [published Online First: 2017/10/17]
- 361 2 Global Health Observatory Data Repository. 2017. Available  
362 online:<http://apps.who.int/gho/data/view.main.BMIPLUS2C10-19v?lang=en>  
363 (accessed on 29 September 2017)
- 364 3 Jiang Y, Wang J, Wu S, et al. Association between Take-Out Food Consumption and  
365 Obesity among Chinese University Students: A Cross-Sectional Study.

- 1  
2  
3 366 *International journal of environmental research and public health* 2019;16(6)  
4 367 doi: 10.3390/ijerph16061071 [published Online First: 2019/04/03]  
5  
6 368 4 Rong Y, Niu CY, Zhao HX, et al. Association of Adolescent Obesity with Nonalcoholic  
7 369 Fatty Liver Disease and Related Risk Factors in Xi 'an, China. *Annals of*  
8 370 *Hepatology Official Journal of the Mexican Association of Hepatology*  
9 371 2018;17(1):85-91.  
10  
11 372 5 Lisan Q, Van Sloten T, Marques Vidal P, et al. Association of Positive Airway  
12 373 Pressure Prescription With Mortality in Patients With Obesity and Severe  
13 374 Obstructive Sleep Apnea: The Sleep Heart Health Study. *JAMA*  
14 375 *otolaryngology-- head & neck surgery* 2019 doi: 10.1001/jamaoto.2019.0281  
15 376 [published Online First: 2019/04/12]  
16  
17 377 6 Lai SH, Tsai YW, Chen YC, et al. Obesity, hyperhomocysteinaemia and risk of  
18 378 chronic kidney disease: a population-based study. *Family Practice* 2017;35(3)  
19 379 7 Sabanayagam C, Wong TY, Liao J, et al. Body mass index and preclinical kidney  
20 380 disease in Indian adults aged 40 years and above without chronic kidney  
21 381 disease. *Clinical and experimental nephrology* 2014;18(6):919-24. doi:  
22 382 10.1007/s10157-014-0945-6 [published Online First: 2014/02/15]  
23 383 8 Addo PN, Nyarko KM, Sackey SO, et al. Prevalence of obesity and overweight and  
24 384 associated factors among financial institution workers in Accra Metropolis,  
25 385 Ghana: a cross sectional study. *BMC research notes* 2015;8:599. doi:  
26 386 10.1186/s13104-015-1590-1 [published Online First: 2015/10/27]  
27 387 9 Sun H, Ma Y, Han D, et al. Prevalence and trends in obesity among China's children  
28 388 and adolescents, 1985-2010. *PloS one* 2014;9(8):e105469. doi:  
29 389 10.1371/journal.pone.0105469 [published Online First: 2014/08/21]  
30 390 10 Zhang X, Zhang F, Yang J, et al. Prevalence of overweight and obesity among  
31 391 primary school-aged children in Jiangsu Province, China, 2014-2017. *PloS one*  
32 392 2018;13(8):e0202681. doi: 10.1371/journal.pone.0202681 [published Online  
33 393 First: 2018/08/24]  
34 394 11 Ma Y, Peng L, Kou C, et al. Associations of Overweight, Obesity and Related  
35 395 Factors with Sleep-Related Breathing Disorders and Snoring in Adolescents: A  
36 396 Cross-Sectional Survey. *International journal of environmental research and*  
37 397 *public health* 2017;14(2) doi: 10.3390/ijerph14020194 [published Online  
38 398 First: 2017/02/18]  
39 399 12 Rangan A, Zheng M, Olsen NJ, et al. Shorter sleep duration is associated with  
40 400 higher energy intake and an increase in BMI z-score in young children  
41 401 predisposed to overweight. *International journal of obesity (2005)*  
42 402 2018;42(1):59-64. doi: 10.1038/ijo.2017.216 [published Online First:  
43 403 2017/09/09]  
44 404 13 Dello Russo M, Ahrens W, De Henauw S, et al. The Impact of Adding Sugars to  
45 405 Milk and Fruit on Adiposity and Diet Quality in Children: A Cross-Sectional  
46 406 and Longitudinal Analysis of the Identification and Prevention of Dietary- and  
47 407 Lifestyle-Induced Health Effects in Children and Infants (IDEFICS) Study.  
48  
49  
50  
51  
52  
53  
54  
55  
56  
57  
58  
59  
60

- 1  
2  
3 408 *Nutrients* 2018;10(10) doi: 10.3390/nu10101350 [published Online First:  
4 409 2018/09/27]  
5  
6 410 14 Wang H, Zhai F. Programme and policy options for preventing obesity in China.  
7 411 *Obesity Reviews* 2013;14(S2):134-40. doi: 10.1111/obr.12106  
8  
9 412 15 Force. GoCOT. [Body mass index reference norm for screening overweight and  
10 413 obesity in Chinese children and adolescents]. *Zhonghua liu xing bing xue za*  
11 414 *zhi = Zhonghua liuxingbingxue zazhi* 2004;25(2):97-102. [published Online  
12 415 First: 2004/05/11]  
13  
14 416 16 Zhou L, Zeng Q, Jin S, et al. The impact of changes in dietary knowledge on adult  
15 417 overweight and obesity in China. *PloS one* 2017;12(6):e0179551. doi:  
16 418 10.1371/journal.pone.0179551 [published Online First: 2017/06/24]  
17  
18 419 17 Wang R, Zhang P, Gao C, et al. Prevalence of overweight and obesity and some  
19 420 associated factors among adult residents of northeast China: a  
20 421 cross-sectional study. *BMJ open* 2016;6(7):e010828. doi:  
21 422 10.1136/bmjopen-2015-010828 [published Online First: 2016/07/28]  
22  
23 423 18 Slack E, Best KE, Rankin J, et al. Maternal obesity classes, preterm and post-term  
24 424 birth: a retrospective analysis of 479,864 births in England. *BMC pregnancy*  
25 425 *and childbirth* 2019;19(1):434. doi: 10.1186/s12884-019-2585-z [published  
26 426 Online First: 2019/11/23]  
27  
28 427 19 Wang SS, Lay S, Yu HN, et al. Dietary Guidelines for Chinese Residents (2016):  
29 428 comments and comparisons. *Journal of Zhejiang University Science B*  
30 429 2016;17(9):649-56. doi: 10.1631/jzus.B1600341 [published Online First:  
31 430 2016/09/09]  
32  
33 431 20 Antoniou EE, Roefs A, Kremers SP, et al. Picky eating and child weight status  
34 432 development: a longitudinal study. *Journal of human nutrition and dietetics :*  
35 433 *the official journal of the British Dietetic Association* 2016;29(3):298-307. doi:  
36 434 10.1111/jhn.12322 [published Online First: 2015/05/20]  
37  
38 435 21 Oberle MM, Romero Willson S, Gross AC, et al. Relationships among Child Eating  
39 436 Behaviors and Household Food Insecurity in Youth with Obesity. *Childhood*  
40 437 *obesity (Print)* 2019;15(5):298-305. doi: 10.1089/chi.2018.0333 [published  
41 438 Online First: 2019/05/16]  
42  
43 439 22 Li Y, Zhai F, Yang X, et al. Determinants of childhood overweight and obesity in  
44 440 China. *The British journal of nutrition* 2007;97(1):210-5. doi:  
45 441 10.1017/s0007114507280559 [published Online First: 2007/01/16]  
46  
47 442 23 Kelley GA, Kelley KS. Exercise and BMI z-score in overweight and obese children  
48 443 and adolescents: protocol for a systematic review and network meta-analysis  
49 444 of randomised trials. *BMJ open* 2016;6(4):e011258. doi:  
50 445 10.1136/bmjopen-2016-011258 [published Online First: 2016/04/17]  
51  
52 446 24 Xu F, Li J, Ware RS, et al. Associations of television viewing time with excess body  
53 447 weight among urban and rural high-school students in regional mainland  
54 448 China. *Public health nutrition* 2008;11(9):891-6. doi:  
55 449 10.1017/s1368980007001280 [published Online First: 2007/11/17]  
56  
57  
58  
59  
60

- 1  
2  
3 450 25 Yi X, Yin C, Chang M, et al. Prevalence and risk factors of obesity among  
4 451 school-aged children in Xi'an, China. *European journal of pediatrics*  
5 452 2012;171(2):389-94. doi: 10.1007/s00431-011-1566-7 [published Online First:  
6 453 2011/09/14]  
7  
8 454 26 Hu L, Huang X, You C, et al. Prevalence of overweight, obesity, abdominal obesity  
9 455 and obesity-related risk factors in southern China. *PloS one*  
10 456 2017;12(9):e0183934. doi: 10.1371/journal.pone.0183934 [published Online  
11 457 First: 2017/09/15]  
12  
13 458 27 Li P, Jiang R, Li L, et al. Prevalence and risk factors of metabolic syndrome in  
14 459 school adolescents of northeast China. *Journal of pediatric endocrinology &*  
15 460 *metabolism : JPEM* 2014;27(5-6):525-32. doi: 10.1515/jpem-2013-0336  
16 461 [published Online First: 2014/05/14]  
17  
18 462 28 Reynolds K, Gu D, Whelton PK, et al. Prevalence and Risk Factors of Overweight  
19 463 and Obesity in China\*. *Obesity* 2012;15(1):10-18.  
20  
21 464 29 Zhuo Q, Wang Z, Piao J, et al. Geographic variation in the prevalence of  
22 465 overweight and economic status in Chinese adults. *The British journal of*  
23 466 *nutrition* 2009;102(3):413-8. doi: 10.1017/s0007114508184732 [published  
24 467 Online First: 2009/01/14]  
25  
26 468 30 Jia P, Xue H, Zhang J, et al. Time Trend and Demographic and Geographic  
27 469 Disparities in Childhood Obesity Prevalence in China-Evidence from Twenty  
28 470 Years of Longitudinal Data. *International journal of environmental research*  
29 471 *and public health* 2017;14(4) doi: 10.3390/ijerph14040369 [published Online  
30 472 First: 2017/04/01]  
31  
32 473 31 Jia P, Li M, Xue H, et al. School environment and policies, child eating behavior  
33 474 and overweight/obesity in urban China: the childhood obesity study in China  
34 475 megacities. *International journal of obesity (2005)* 2017;41(5):813-19. doi:  
35 476 10.1038/ijo.2017.2 [published Online First: 2017/01/12]  
36  
37 477 32 Zhang Y, Zhao J, Chu Z, et al. Increasing prevalence of childhood overweight and  
38 478 obesity in a coastal province in China. *Pediatric obesity* 2016;11(6):e22-e26.  
39 479 doi: 10.1111/ijpo.12070 [published Online First: 2015/09/26]  
40  
41 480 33 Eriksson M, Lingfors H, Golsater M. Trends in prevalence of thinness, overweight  
42 481 and obesity among Swedish children and adolescents between 2004 and  
43 482 2015. *Acta paediatrica (Oslo, Norway : 1992)* 2018;107(10):1818-25. doi:  
44 483 10.1111/apa.14356 [published Online First: 2018/04/11]  
45  
46 484 34 Li J, Lei J, Wen S, et al. Sex disparity and perception of obesity/overweight by  
47 485 parents and grandparents. *Paediatrics & child health* 2014;19(7):e113-6. doi:  
48 486 10.1093/pch/19.7.e113 [published Online First: 2014/10/22]  
49  
50 487 35 Zhang J, Wang H, Wang Z, et al. Prevalence and stabilizing trends in overweight  
51 488 and obesity among children and adolescents in China, 2011-2015. *BMC public*  
52 489 *health* 2018;18(1):571. doi: 10.1186/s12889-018-5483-9 [published Online  
53 490 First: 2018/05/03]  
54  
55 491 36 Zhai L, Dong Y, Bai Y, et al. Trends in obesity, overweight, and malnutrition among  
56  
57  
58  
59  
60



- 1  
2  
3 492 children and adolescents in Shenyang, China in 2010 and 2014: a multiple  
4 cross-sectional study. *BMC public health* 2017;17(1):151. doi:  
5 493 10.1186/s12889-017-4072-7 [published Online First: 2017/02/06]  
6 494  
7 495 37 You J, Choo J. Adolescent Overweight and Obesity: Links to Socioeconomic Status  
8 and Fruit and Vegetable Intakes. *International journal of environmental*  
9 496 *research and public health* 2016;13(3) doi: 10.3390/ijerph13030307  
10 497 [published Online First: 2016/03/24]  
11 498  
12 499 38 Tohill BC, Seymour J, Serdula M, et al. What epidemiologic studies tell us about  
13 the relationship between fruit and vegetable consumption and body weight.  
14 500 *Nutrition reviews* 2004;62(10):365-74. doi:  
15 501 10.1111/j.1753-4887.2004.tb00007.x [published Online First: 2004/10/29]  
16 502  
17 503 39 Xiong LH, Wang CL, Chen ZQ, et al. [Study on food preference and dietary  
18 behavior to overweight/obesity in school children and adolescents in  
19 Guangzhou: a case-control study]. *Zhonghua liu xing bing xue za zhi =*  
20 504 *Zhonghua liuxingbingxue zazhi* 2008;29(10):965-9. [published Online First:  
21 505 2009/01/29]  
22 506  
23 507  
24 508 40 Qiu C, Hou M. Association between Food Preferences, Eating Behaviors and  
25 Socio-Demographic Factors, Physical Activity among Children and  
26 509 Adolescents: A Cross-Sectional Study. *Nutrients* 2020;12(3) doi:  
27 510 10.3390/nu12030640 [published Online First: 2020/03/04]  
28 511  
29 512 41 Ferreira RJ, Marques-Vidal PM. Prevalence and determinants of obesity in  
30 children in public schools of Sintra, Portugal. *Obesity (Silver Spring, Md)*  
31 513 2008;16(2):497-500. doi: 10.1038/oby.2007.74 [published Online First:  
32 514 2008/02/02]  
33 515  
34 516 42 Andegiorgish AK, Wang J, Zhang X, et al. Prevalence of overweight, obesity, and  
35 associated risk factors among school children and adolescents in Tianjin,  
36 517 China. *European journal of pediatrics* 2012;171(4):697-703. doi:  
37 518 10.1007/s00431-011-1636-x [published Online First: 2011/12/14]  
38 519  
39 520 43 Liu J, Hay J, Faught BE, et al. Family eating and activity habits, diet quality and  
40 pre-adolescent overweight and obesity. *Public health* 2012;126(6):532-4. doi:  
41 521 10.1016/j.puhe.2012.02.012 [published Online First: 2012/05/09]  
42 522  
43 523 44 An R. Diet quality and physical activity in relation to childhood obesity.  
44 *International journal of adolescent medicine and health* 2017;29(2) doi:  
45 524 10.1515/ijamh-2015-0045 [published Online First: 2015/09/10]  
46 525  
47 526 45 Watts AW, Lovato CY, Barr SI, et al. A qualitative study exploring how school and  
48 community environments shape the food choices of adolescents with  
49 527 overweight/obesity. *Appetite* 2015;95:360-7. doi:  
50 528 10.1016/j.appet.2015.07.022 [published Online First: 2015/07/28]  
51 529  
52 530 46 Naess M, Holmen TL, Langaas M, et al. Intergenerational Transmission of  
53 Overweight and Obesity from Parents to Their Adolescent Offspring - The  
54 HUNT Study. *PloS one* 2016;11(11):e0166585. doi:  
55 531 10.1371/journal.pone.0166585 [published Online First: 2016/11/17]  
56 532  
57 533  
58  
59  
60

- 1  
2  
3 534 47 Tu AW, Watts AW, Masse LC. Parent-Adolescent Patterns of Physical Activity,  
4 535 Sedentary Behaviors and Sleep Among a Sample of Overweight and Obese  
5 536 Adolescents. *Journal of physical activity & health* 2015;12(11):1469-76. doi:  
6 537 10.1123/jpah.2014-0270 [published Online First: 2015/01/27]  
7  
8 538 48 Brennan L, Walkley J, Wilks R. Parent- and adolescent-reported barriers to  
9 539 participation in an adolescent overweight and obesity intervention. *Obesity*  
10 540 (*Silver Spring, Md*) 2012;20(6):1319-24. doi: 10.1038/oby.2011.358  
11 541 [published Online First: 2011/12/24]  
12  
13 542 49 Jiang MH, Yang Y, Guo XF, et al. Association between child and adolescent obesity  
14 543 and parental weight status: a cross-sectional study from rural North China.  
15 544 *The Journal of international medical research* 2013;41(4):1326-32. doi:  
16 545 10.1177/0300060513480081 [published Online First: 2013/06/19]  
17  
18 546 50 Shafaghi K, Shariff ZM, Taib MN, et al. Parental body mass index is associated with  
19 547 adolescent overweight and obesity in Mashhad, Iran. *Asia Pacific journal of*  
20 548 *clinical nutrition* 2014;23(2):225-31. doi: 10.6133/apjcn.2014.23.2.11  
21 549 [published Online First: 2014/06/06]  
22  
23 550 51 Maffei C, Talamini G, Tato L. Influence of diet, physical activity and parents'  
24 551 obesity on children's adiposity: a four-year longitudinal study. *International*  
25 552 *journal of obesity and related metabolic disorders : journal of the*  
26 553 *International Association for the Study of Obesity* 1998;22(8):758-64.  
27 554 [published Online First: 1998/09/02]  
28  
29 555  
30 556  
31  
32  
33  
34  
35  
36  
37  
38  
39  
40  
41  
42  
43  
44  
45  
46  
47  
48  
49  
50  
51  
52  
53  
54  
55  
56  
57  
58  
59  
60

STROBE Statement—Checklist of items that should be included in reports of *cross-sectional studies*

|                           | Item No | Recommendation                                                                                                                                                                                    | Page/line number       |
|---------------------------|---------|---------------------------------------------------------------------------------------------------------------------------------------------------------------------------------------------------|------------------------|
| <b>Title and abstract</b> | 1       | (a) Indicate the study's design with a commonly used term in the title or the abstract                                                                                                            | Page 1                 |
|                           |         | (b) Provide in the abstract an informative and balanced summary of what was done and what was found                                                                                               | Page 2-3, line 23-47   |
| <b>Introduction</b>       |         |                                                                                                                                                                                                   |                        |
| Background/rationale      | 2       | Explain the scientific background and rationale for the investigation being reported                                                                                                              | Page 3-5, line 61-88   |
| Objectives                | 3       | State specific objectives, including any prespecified hypotheses                                                                                                                                  | Page 5, line 89-92     |
| <b>Methods</b>            |         |                                                                                                                                                                                                   |                        |
| Study design              | 4       | Present key elements of study design early in the paper                                                                                                                                           | Page 5-6               |
| Setting                   | 5       | Describe the setting, locations, and relevant dates, including periods of recruitment, exposure, follow-up, and data collection                                                                   | Page 5-6               |
| Participants              | 6       | (a) Give the eligibility criteria, and the sources and methods of selection of participants                                                                                                       | Page 5, line 95-102    |
| Variables                 | 7       | Clearly define all outcomes, exposures, predictors, potential confounders, and effect modifiers. Give diagnostic criteria, if applicable                                                          | Page 7-8, line 127-158 |
| Data sources/measurement  | 8*      | For each variable of interest, give sources of data and details of methods of assessment (measurement). Describe comparability of assessment methods if there is more than one group              | Page 6, line 109-125   |
| Bias                      | 9       | Describe any efforts to address potential sources of bias                                                                                                                                         | Page 9, line 167-172   |
| Study size                | 10      | Explain how the study size was arrived at                                                                                                                                                         | Page 5, line 95-99     |
| Quantitative variables    | 11      | Explain how quantitative variables were handled in the analyses. If applicable, describe which groupings were chosen and why                                                                      | Page 7-8, line 127-158 |
| Statistical methods       | 12      | (a) Describe all statistical methods, including those used to control for confounding                                                                                                             | Page 8-9, line 160-167 |
|                           |         | (b) Describe any methods used to examine subgroups and interactions                                                                                                                               | Page 8-9, line 160-167 |
|                           |         | (c) Explain how missing data were addressed                                                                                                                                                       | Page 9, line 167-172   |
|                           |         | (d) If applicable, describe analytical methods taking account of sampling strategy                                                                                                                | N/A                    |
|                           |         | (e) Describe any sensitivity analyses                                                                                                                                                             | Page 8-9, line 160-167 |
| <b>Results</b>            |         |                                                                                                                                                                                                   |                        |
| Participants              | 13*     | (a) Report numbers of individuals at each stage of study—eg numbers potentially eligible, examined for eligibility, confirmed eligible, included in the study, completing follow-up, and analysed | Page 10, line 186-192  |
|                           |         | (b) Give reasons for non-participation at each stage                                                                                                                                              | N/A                    |
|                           |         | (c) Consider use of a flow diagram                                                                                                                                                                | N/A                    |
| Descriptive data          | 14*     | (a) Give characteristics of study participants (eg demographic, clinical, social) and information on exposures and potential                                                                      | Page 9-10              |



|                          |     |                                                                                                                                                                                                              |                          |
|--------------------------|-----|--------------------------------------------------------------------------------------------------------------------------------------------------------------------------------------------------------------|--------------------------|
|                          |     | confounders                                                                                                                                                                                                  |                          |
|                          |     | (b) Indicate number of participants with missing data for each variable of interest                                                                                                                          | Page 10, line 186-190    |
| Outcome data             | 15* | Report numbers of outcome events or summary measures                                                                                                                                                         | Page 10, line 186-192    |
| Main results             | 16  | (a) Give unadjusted estimates and, if applicable, confounder-adjusted estimates and their precision (eg, 95% confidence interval). Make clear which confounders were adjusted for and why they were included | Page 11-12               |
|                          |     | (b) Report category boundaries when continuous variables were categorized                                                                                                                                    | N/A                      |
|                          |     | (c) If relevant, consider translating estimates of relative risk into absolute risk for a meaningful time period                                                                                             | N/A                      |
| Other analyses           | 17  | Report other analyses done—eg analyses of subgroups and interactions, and sensitivity analyses                                                                                                               | Page 12-15               |
| <b>Discussion</b>        |     |                                                                                                                                                                                                              |                          |
| Key results              | 18  | Summarise key results with reference to study objectives                                                                                                                                                     | Page 16, line 242-245    |
| Limitations              | 19  | Discuss limitations of the study, taking into account sources of potential bias or imprecision. Discuss both direction and magnitude of any potential bias                                                   | Page 19, line 306-317    |
| Interpretation           | 20  | Give a cautious overall interpretation of results considering objectives, limitations, multiplicity of analyses, results from similar studies, and other relevant evidence                                   | Page 15-19               |
| Generalisability         | 21  | Discuss the generalisability (external validity) of the study results                                                                                                                                        | Page 19-20, line 319-327 |
| <b>Other information</b> |     |                                                                                                                                                                                                              |                          |
| Funding                  | 22  | Give the source of funding and the role of the funders for the present study and, if applicable, for the original study on which the present article is based                                                | Page 20, line 336-338    |

\*Give information separately for exposed and unexposed groups.

**Note:** An Explanation and Elaboration article discusses each checklist item and gives methodological background and published examples of transparent reporting. The STROBE checklist is best used in conjunction with this article (freely available on the Web sites of PLoS Medicine at <http://www.plosmedicine.org/>, Annals of Internal Medicine at <http://www.annals.org/>, and Epidemiology at <http://www.epidem.com/>). Information on the STROBE Initiative is available at [www.strobe-statement.org](http://www.strobe-statement.org).

# BMJ Open

## Prevalence and correlates of overweight and obesity among adolescents in northeastern China: a cross-sectional study

|                                 |                                                                                                                                                                                                                                                                                                                                                                                                                                                                                                                                                                                                                                                                                                                                                                                                                                                                                                                                                               |
|---------------------------------|---------------------------------------------------------------------------------------------------------------------------------------------------------------------------------------------------------------------------------------------------------------------------------------------------------------------------------------------------------------------------------------------------------------------------------------------------------------------------------------------------------------------------------------------------------------------------------------------------------------------------------------------------------------------------------------------------------------------------------------------------------------------------------------------------------------------------------------------------------------------------------------------------------------------------------------------------------------|
| Journal:                        | <i>BMJ Open</i>                                                                                                                                                                                                                                                                                                                                                                                                                                                                                                                                                                                                                                                                                                                                                                                                                                                                                                                                               |
| Manuscript ID                   | bmjopen-2020-036820.R2                                                                                                                                                                                                                                                                                                                                                                                                                                                                                                                                                                                                                                                                                                                                                                                                                                                                                                                                        |
| Article Type:                   | Original research                                                                                                                                                                                                                                                                                                                                                                                                                                                                                                                                                                                                                                                                                                                                                                                                                                                                                                                                             |
| Date Submitted by the Author:   | 26-Apr-2020                                                                                                                                                                                                                                                                                                                                                                                                                                                                                                                                                                                                                                                                                                                                                                                                                                                                                                                                                   |
| Complete List of Authors:       | Duan, Ruixin; Jilin University School of Public Health, Department of Epidemiology and Biostatistics; Jilin University First Hospital, Pulmonary Division & Sleep Center<br>Kou, Changgui; Jilin University School of Public Health, Department of Epidemiology and Biostatistics<br>Jie, Jing; Jilin University First Hospital, Pulmonary Division & Sleep Center<br>bai , wei; Jilin University School of Public Health, Department of Epidemiology and Biostatistics<br>Lan, Xiaoxin; Jilin University First Hospital, Pulmonary Division & Sleep Center<br>Li, Yuanyuan; Jilin University School of Public Health, Department of Epidemiology and Biostatistics<br>Yu, Xiao; Jilin University School of Public Health, Department of Epidemiology and Biostatistics<br>Zhu, Bo; Jilin University School of Public Health, Department of Epidemiology and Biostatistics<br>Yuan, Haibo; Jilin University First Hospital, Pulmonary Division & Sleep Center |
| <b>Primary Subject Heading</b>: | Epidemiology                                                                                                                                                                                                                                                                                                                                                                                                                                                                                                                                                                                                                                                                                                                                                                                                                                                                                                                                                  |
| Secondary Subject Heading:      | Public health                                                                                                                                                                                                                                                                                                                                                                                                                                                                                                                                                                                                                                                                                                                                                                                                                                                                                                                                                 |
| Keywords:                       | PUBLIC HEALTH, EPIDEMIOLOGY, Risk management < HEALTH SERVICES ADMINISTRATION & MANAGEMENT                                                                                                                                                                                                                                                                                                                                                                                                                                                                                                                                                                                                                                                                                                                                                                                                                                                                    |
|                                 |                                                                                                                                                                                                                                                                                                                                                                                                                                                                                                                                                                                                                                                                                                                                                                                                                                                                                                                                                               |

SCHOLARONE™  
Manuscripts

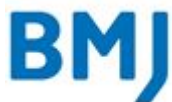

I, the Submitting Author has the right to grant and does grant on behalf of all authors of the Work (as defined in the below author licence), an exclusive licence and/or a non-exclusive licence for contributions from authors who are: i) UK Crown employees; ii) where BMJ has agreed a CC-BY licence shall apply, and/or iii) in accordance with the terms applicable for US Federal Government officers or employees acting as part of their official duties; on a worldwide, perpetual, irrevocable, royalty-free basis to BMJ Publishing Group Ltd ("BMJ") its licensees and where the relevant Journal is co-owned by BMJ to the co-owners of the Journal, to publish the Work in this journal and any other BMJ products and to exploit all rights, as set out in our [licence](#).

The Submitting Author accepts and understands that any supply made under these terms is made by BMJ to the Submitting Author unless you are acting as an employee on behalf of your employer or a postgraduate student of an affiliated institution which is paying any applicable article publishing charge ("APC") for Open Access articles. Where the Submitting Author wishes to make the Work available on an Open Access basis (and intends to pay the relevant APC), the terms of reuse of such Open Access shall be governed by a Creative Commons licence – details of these licences and which [Creative Commons](#) licence will apply to this Work are set out in our licence referred to above.

Other than as permitted in any relevant BMJ Author's Self Archiving Policies, I confirm this Work has not been accepted for publication elsewhere, is not being considered for publication elsewhere and does not duplicate material already published. I confirm all authors consent to publication of this Work and authorise the granting of this licence.

1  
2  
3  
4 1 Prevalence and correlates of overweight and obesity  
5  
6  
7 2 among adolescents in northeastern China: a  
8  
9  
10 3 cross-sectional study  
11

12 4 Ruixin Duan<sup>1, 2</sup>, Changgui Kou<sup>1</sup>, Jing Jie<sup>2</sup>, Wei Bai<sup>1</sup>, Xiaoxin Lan<sup>2</sup>, Yuanyuan Li<sup>1</sup>,  
13  
14  
15 5 Xiao Yu<sup>1</sup>, Bo Zhu<sup>1</sup>, Haibo Yuan<sup>2\*</sup>  
16  
17

18 6

19  
20 7

21  
22  
23 8 <sup>1</sup> Department of Epidemiology and Biostatistics, School of Public Health, Jilin  
24  
25 9 University, 1163 Xinmin Street, Changchun, 130021, Jilin province, China;

26  
27  
28 10 <sup>2</sup> Pulmonary Division & Sleep Center, The First Hospital of Jilin University,  
29  
30  
31 11 Changchun, 130021, Jilin Province, China.  
32

33 12

34  
35 13

36  
37 14

38  
39 15

40  
41  
42 16 \*Corresponding Author:

43  
44  
45 17 Haibo Yuan<sup>2\*</sup>  
46  
47

48  
49 18 The First Hospital of Jilin University, Changchun, 130021, Jilin Province, China  
50

51  
52 19 Email address: hyuan@jlu.edu.cn  
53

54  
55 20 Word count: 3694  
56

57 21

58 22  
59  
60

## 23 Abstract

24 **Objectives:** To estimate the prevalence of overweight/obesity among adolescents and  
25 to evaluate the associated factors in this group in Changchun City, northeastern China.

26 **Methods:** A cross-sectional study of 1955 adolescents aged 11–18 years was  
27 conducted in Changchun City, using stratified cluster sampling. Parents and  
28 caregivers of children completed the questionnaires as requested without objection;  
29 the questionnaire included demographic characteristics and anthropometric  
30 parameters. Univariate and multivariate logistic regression analyses were performed  
31 to analyze the relationship between overweight /obesity and related factors.

32 **Results:** In total, the prevalence of overweight was 12.7% (male 17.4%; female  
33 10.1%), and the prevalence of obesity was 4.9% (male 8.8%; female 3.1%) in  
34 Changchun, Jilin Province. The prevalence of overweight and obesity was higher in  
35 males than that in females ( $P < 0.001$ ). Multivariate logistic regression showed that  
36 overweight and obesity were significantly associated with male (OR=1.91, 95% CI:  
37 1.48-2.47), fresh fruits two or more days per week (OR=1.41, 95% CI: 1.09-1.84),  
38 eating quickly (OR=1.37, 95% CI: 1.06-1.78). The students who were not picky  
39 (OR=0.69, 95% CI: 0.53-0.90) were less likely to be overweight. And adolescents  
40 whose father were overweight or obese (OR=0.67, 95% CI: 0.52-0.86) or mother  
41 were overweight or obese (OR=0.72, 95% CI: 0.52-0.99) were less likely to be  
42 overweight.

43 **Conclusion:** The prevalence of overweight and obesity among adolescents in

1  
2  
3  
4 44 Changchun was high in recent years. The prevalence of overweight and obesity  
5  
6  
7 45 among males was higher than that among females. Sex, dietary habits (weekly  
8  
9  
10 46 frequency of fruit consumption, picky eating and slowness in eating) and parental  
11  
12 47 weight were important factors for overweight and obesity in adolescents. Further  
13  
14  
15 48 research should be conducted on the health of adolescents in China and further  
16  
17  
18 49 intervention measures should be implemented to reduce the prevalence of  
19  
20  
21 50 overweight/obesity.

22  
23 51 **Keywords:** overweight; obesity; adolescent; association  
24  
25  
26

## 27 52 **Strengths and limitations of this study**

28  
29  
30

- 31 53 ● In the cross-sectional study, participants were randomly selected from rural and  
32  
33  
34 54 urban areas by stratified cluster sampling.  
35  
36  
37 55 ● Weight category was defined using age- and sex- specific BMI cutoff points  
38  
39  
40 56 specifically developed for the Chinese adolescent population.  
41  
42  
43 57 ● The influence of confounding factors on the results was effectively controlled by  
44  
45  
46 58 the multivariate logistic regression method.  
47  
48  
49 59 ● Missing data from childhood measurements were handled with a mean  
50  
51  
52 60 imputation technique.  
53  
54  
55 61 ● The contents of the questionnaire were most recalled by the parents or guardians  
56  
57  
58 62 and there might be information bias in this survey.  
59  
60

## 63 **Introduction**

1  
2  
3  
4 64 The prevalence of obesity has increased dramatically among children, adolescents and  
5  
6  
7 65 adults worldwide in recent decades [1]. Overall, the global proportion of adolescents  
8  
9  
10 66 with obesity has increased significantly from just 4% in 1975 to just over 18% in  
11  
12 67 2016 [2]. There is compelling evidence revealing a significantly higher proportion of  
13  
14  
15 68 overweight or obese adolescents in recent years, which has reached alarming levels.  
16  
17  
18 69 Recently, scholars have conducted many studies on overweight and obesity.  
19  
20  
21 70 Overweight and obesity are predisposing factors for many chronic diseases, such as  
22  
23  
24 71 type 2 diabetes, cardiovascular diseases, respiratory diseases, musculoskeletal  
25  
26  
27 72 disorders, and various types of cancer [3]. Yan R et al. found an association of  
28  
29  
30 73 adolescent obesity with nonalcoholic fatty liver disease (NAFLD) and revealed that  
31  
32  
33 74 the incidence of NAFLD increased with increasing body weight [4]. Lisan Q et al.  
34  
35  
36 75 compared patients with obesity and severe obstructive sleep apnoea (OSA) with and  
37  
38  
39 76 without prescription of positive airway pressure (PAP) therapy and found that  
40  
41  
42 77 participants with PAP prescriptions had a higher BMI (Body mass index) than  
43  
44  
45 78 participants not prescribed PAP [5]. It has been estimated that overweight and obesity  
46  
47  
48 79 are the fifth leading cause of death worldwide, accounting for nearly 3.4 million  
49  
50  
51 80 deaths annually [6]. In addition, obesity is considered a risk factor for the  
52  
53  
54 81 development of chronic kidney disease [7]. In this context, the American Medical  
55  
56  
57 82 Association classified obesity as a disease to get physicians to pay more attention to  
58  
59  
60 83 the condition [8].

1  
2  
3  
4 84 In China, the largest developing country, nearly one-third of adolescents were  
5  
6  
7 85 overweight or obese in 2016, and the obesity prevalence rate increased from 0.10% in  
8  
9  
10 86 1976 to 8.50% in 2016. Sun HP found that the prevalence of obesity and of  
11  
12 87 overweight and obesity combined was 8.1% and 19.2%, respectively, among children  
13  
14  
15 88 and adolescents at the age of 7–18 [9]. Zhang XY reported that the prevalence rates of  
16  
17 89 overweight and obesity among primary school children were 15.2% and 11.7%,  
18  
19  
20 90 respectively, in Jiangsu Province [10]. Therefore, it is of key importance to  
21  
22  
23 91 understand the risk factors for overweight and obesity to prevent adolescents from  
24  
25  
26 92 developing the disease.

27  
28 93 We investigated the physical condition of adolescents aged 11-18 years from six  
29  
30  
31 94 middle schools in Changchun which is the capital of Jilin Province. The aim of the  
32  
33  
34 95 current study was to reveal the prevalence of overweight and obesity and to analyze  
35  
36  
37 96 various associated factors among adolescents with overweight and obesity in  
38  
39  
40 97 Changchun, Jilin.

## 41 42 43 98 **Methods**

### 44 45 46 47 99 **Subjects**

48  
49  
50  
51 100 A cross-sectional survey was conducted in Changchun City, the capital of Jilin  
52  
53  
54 101 Province in Northeast China. The study sample comprised middle and high school  
55  
56  
57 102 students from six middle schools (three in urban areas and three in rural areas),  
58  
59  
60 103 selected randomly using stratified cluster sampling. Overall, 1955 students aged 11–



1  
2  
3  
4 104 18 years were included in this cross-sectional survey; subjects with  
5  
6  
7 105 overweight/obesity due to known metabolic and endocrine diseases were excluded.  
8  
9 106 Students were also excluded if they had mental or physical impairments severe  
10  
11  
12 107 enough to cause abnormal behaviors, including congenital disease, intellectual  
13  
14  
15 108 disability, and a psychiatric disorder [11]. We used the STROBE checklist in this  
16  
17  
18 109 study.

## 110 **Data collection**

111 The study was carried out by the First Hospital of Jilin University in April 2016. The  
112 study was approved by the ethics committee of the First Hospital of Jilin University  
113 (Reference Number: 2013-031). The investigation received informed consent from  
114 students and parents. The project was named “Effect and mechanism of weight loss  
115 on upper airway collapsibility in obese patients with OSAS” and studied the  
116 associations of overweight, obesity and related factors with sleep-related breathing  
117 disorders and snoring in adolescents. In this database, we focused on the relevant  
118 indicators of overweight and obesity in adolescents and analyzed the risk factors for  
119 obesity in adolescents. The interviewers from the First Hospital of Jilin University  
120 helped parents or guardians complete the questionnaire and provided the data. The  
121 questionnaire included demographic characteristics (age, sex, area, dietary habits,  
122 sleep, exercise, highest parental education, birth history, BMI classification, paternal  
123 weight and maternal weight), anthropometric parameters (weight, height) and a

1  
2  
3  
4 124 paediatric sleep questionnaire- the Sleep-Related Breathing Disorder (PSQ-SRBD).  
5

6  
7 125 The data about sleep duration and dietary habits (frequency of fresh fruits  
8

9  
10 126 consumption, frequency of dessert consumption, frequency of breakfast consumption,  
11

12  
13 127 frequency of fast food consumption, slowness in eating, picky eating) were selected  
14

15  
16 128 from the PSQ-SRBD scale according to various reports [12-14] about adolescent  
17

18  
19 129 obesity.  
20

### 21 130 **Key variables**

22  
23  
24  
25 131 Body mass index (BMI) is used here as an indicator of overweight and obesity in  
26

27  
28 132 adolescents and adults. Weight category was defined using age- and sex- specific  
29

30  
31 133 BMI cutoff points specifically developed for the Chinese adolescent population [15].  
32

33  
34 134 We used the 85<sup>th</sup> and 95<sup>th</sup> percentiles to define overweight and obesity in adolescents.  
35

36  
37 135 Therefore, BMI values of 24 and 28 were used as cut-off points  
38

39  
40 136 for overweight and obesity, both for males and females aged 18 years, which were  
41

42  
43 137 consistent with Chinese adults. In our study, parental overweight was divided into 2  
44

45  
46 138 groups: normal (BMI<24) and overweight or obese (BMI≥24) [14, 16]. Parents and  
47

48  
49 139 caregivers provided information on adolescents' weight (to the nearest 1 kg) and  
50

51  
52 140 height (to the nearest 1 cm). Overall children were classified by age into 3 groups  
53

54  
55 141 (<13 years, 13-15 years, >15 years), by region into 2 groups (urban, rural) and by sex  
56

57  
58 142 into 2 groups (male, female). Participants who slept less than 8 hours 3 days a week  
59

60  
143 were classified as 'sleep <8 h', and those who slept more than 10 hours 3 days a week

1  
2  
3  
4 144 were defined as 'sleep >10 h' [17]. Birth history was divided into 3 groups: preterm  
5  
6  
7 145 birth (infants born alive before 37 weeks of pregnancy), full-term birth (infants born  
8  
9  
10 146 alive after 37 completed weeks to less than 42 completed weeks) and post-term birth  
11  
12 147 (infants born alive at 42 completed weeks or after) [18]. Parental educational level  
13  
14  
15 148 was divided into 4 groups: primary school or lower (including those who had never  
16  
17  
18 149 attended school and those with elementary schooling only), junior high school, senior  
19  
20  
21 150 high school (including those with 3 years of secondary vocational schooling) and  
22  
23 151 university or above [17]. According to the contents of the questionnaire, we classified  
24  
25  
26 152 the participants' eating habits. According to the Food Guide Pagoda [19], fruit intake  
27  
28  
29 153 should be 200-350 g/d, and sugar intake should be no more than 50 g/d, so we used  
30  
31  
32 154 eating "fresh fruits two or more days per week (350 g/d)", "dessert two or more days  
33  
34  
35 155 per week", "breakfast two or more days per week", and "fast food two or more days  
36  
37 156 per week" as cut-offs. Participants who were classified as "picky eating" were defined  
38  
39  
40 157 as adolescents who had selectivity for a particular kind of food [20]. "Slowness in  
41  
42  
43 158 eating" was defined as adolescents with higher masticatory performance and who ate  
44  
45  
46 159 slowly [21]. Groups were formed according to the number of exercise days (aerobic,  
47  
48  
49 160 strength training or both for at least 30 minutes a day), including never (participate in  
50  
51  
52 161 sports  $\leq 1$  day per week), sometimes (participate in sports 2-3 days per week) and  
53  
54  
55 162 often (participate in sports  $\geq 4$  days per week) [22, 23].

## 163 **Statistical analysis**

1  
2  
3  
4 164 Data input was performed using Epidata 3.1, and statistical analysis was performed  
5  
6  
7 165 using SPSS 24.0. Frequency distributions are used to characterize subjects, and  
8  
9  
10 166 percentage data are used to report prevalence. The relationship between each factor  
11  
12 167 and the adolescents' weight status was reflected by  $\chi^2$  tests and univariate and  
13  
14  
15 168 multivariate logistic regression. In univariate analysis, when  $P < 0.10$ , significant  
16  
17  
18 169 correlation factors were included in a forward stepwise multivariate logistic  
19  
20  
21 170 regression to exclude confounding factors. In all analyses, a two-tailed  $P$  value  $< 0.05$   
22  
23  
24 171 was considered statistically significant. Since the database was manually collated,  
25  
26  
27 172 some variables in the database had missing values, which resulted in waste and bias of  
28  
29  
30 173 data resources. The missing value was numeric, and the data were approximately  
31  
32  
33 174 normally distributed. The mean interpolation method was adopted in this study.  
34  
35  
36 175 Therefore, we used the "replace missing value" function in SPSS 24.0 and selected  
37  
38  
39 176 the "mean of nearby points" method to interpolate the missing values.

## 40 177 **Data availability**

41  
42  
43  
44 178 Data referenced in this study are available in the project titled "Effect and mechanism  
45  
46  
47 179 of weight loss on upper airway collapsibility in obese patients with OSAS". We  
48  
49  
50 180 selected a portion of the data from the database, including body measurements of  
51  
52  
53 181 adolescents from six middle schools in Changchun City. The data that support the  
54  
55  
56 182 findings of this study are available on request from the corresponding author [HY].  
57  
58  
59 183 The data are not publicly available because they contain information that could  
60

1  
2  
3  
4 184 compromise research participant privacy or consent.  
5  
6  
7

## 8 185 **Patient and public involvement**

9

10  
11 186 The interviewers from the First Hospital of Jilin University helped parents or  
12  
13  
14 187 guardians complete the questionnaire and provided the data. The adolescents were not  
15  
16  
17 188 involved in the design, recruitment or conduction of the study.  
18  
19

## 20 21 189 **Results**

22

23  
24  
25 190 On the basis of the inclusion and exclusion criteria, we chose 1955 adolescents from  
26  
27  
28 191 Changchun, and of these adolescents, 1825 were finally analyzed in this study.

29  
30 192 Participants with missing BMI values were excluded from the study. Since the survey  
31  
32  
33 193 was already completed, we were unable to verify the source of data errors, so we  
34  
35  
36 194 deleted data with missing BMI values. According to the analysis of the frequency  
37  
38  
39 195 distribution, we found that there were 837 boys and 988 girls included; the median  
40  
41  
42 196 age of the students was 15.30 years, ranging from 11 to 18 years; of all these subjects,  
43  
44  
45 197 42.9% were from rural regions and 57.1% were from urban regions; and most of the  
46  
47  
48 198 subjects were Han Chinese, accounting for 98.2%, with only a few participants with  
49  
50 199 minority ethnicities.

51  
52 200 According to the worldwide BMI classification, the overall prevalence of overweight  
53  
54  
55 201 was 12.7% (male 17.4%; female 10.1%), and the prevalence of obesity was 4.9%  
56  
57  
58 202 (male 8.8%; female 3.1%) in Changchun City, Jilin Province (Table 1). The  
59  
60

203 overweight and obese rates were both higher in males than that in females ( $P < 0.001$ ).

204 A higher prevalence of overweight was found in subjects whose ages ranged from

205 11-12 years, and the prevalence of obesity was higher in the age group from 13-15

206 years ( $P = 0.008$ ). Children from urban areas showed a significantly higher proportion

207 of overweight. Full-term birth subjects had a higher prevalence of overweight than

208 others ( $P = 0.014$ ). In addition, students' dietary habits, such as those who ate fruits

209 less than twice a week ( $P = 0.029$ ), ate slowly ( $P = 0.004$ ) and those who were picky ( $P$

210  $= 0.028$ ) had significant differences in overweight in the study. Paternal weight ( $P$

211  $= 0.018$ ) and maternal weight ( $P = 0.006$ ) also had an effect on the children's weight.

212 **Table 1**

213 **Prevalence of overweight and obesity according to demographic characteristics**

| Variables                 | n        | Overweight      |          | Obesity       |          |
|---------------------------|----------|-----------------|----------|---------------|----------|
|                           |          | PR (%)          | <i>p</i> | PR (%)        | <i>p</i> |
| Sex                       |          |                 |          |               |          |
| Male                      | 837      | 17.4(14.9-20.3) | <0.001   | 8.8(6.9-11.2) | <0.001   |
| Female                    | 988      | 10.1 (8.3-12.2) |          | 3.1(2.2-4.5)  |          |
| Area                      |          |                 |          |               |          |
| Urban                     | 1042     | 14.4(12.4-16.7) | 0.14     | 5.6(4.2-7.3)  | 0.863    |
| Rural                     | 783      | 12(9.8-14.5)    |          | 5.8(4.3-7.8)  |          |
| Age                       |          |                 |          |               |          |
| <13                       | 168      | 19.3(13.9-26.1) | 0.008    | 5.1(2.5-10.3) | 0.816    |
| 13-15                     | 1157     | 11.6(9.8-13.6)  |          | 5.9(4.6-7.5)  |          |
| >15                       | 500      | 15.5(12.5-19.0) |          | 5.2(3.4-7.7)  |          |
| Birth history             |          |                 |          |               |          |
| Full-term birth           | 1621     | 14.2(12.5-16.0) | 0.014    | 6.0(4.9-7.4)  | 0.285    |
| Preterm birth             | 133      | 5.4(2.6-11.0)   |          | 3.2(1.2-8.2)  |          |
| Post-term birth           | 71       | 10.1(4.9-19.8)  |          | 3.1(0.8-11.7) |          |
| Fruit $\leq$ 2 times/week |          |                 |          |               |          |
| Yes                       | 1259     | 12.2(10.5-14.2) | 0.029    | 4.8(3.7-6.2)  | 0.02     |
| No                        | 566      | 16.1(13.2-19.5) |          | 7.7(5.6-10.4) |          |
| Dessert                   | $\leq$ 2 |                 |          |               |          |

|                            |      |                 |       |               |       |  |
|----------------------------|------|-----------------|-------|---------------|-------|--|
| times/week                 |      |                 |       |               |       |  |
| Yes                        | 887  | 12.4(10.4-14.8) | 0.252 | 5.2(3.9-7.0)  | 0.49  |  |
| No                         | 938  | 14.3(12.1-16.7) |       | 6.0(4.6-7.9)  |       |  |
| Breakfast $\leq$ 2         |      |                 |       |               |       |  |
| times/week                 |      |                 |       |               |       |  |
| Yes                        | 1478 | 13.9(12.2-15.8) | 0.185 | 5.8(4.7-7.3)  | 0.491 |  |
| No                         | 347  | 11.1(8.2-15.0)  |       | 4.8(2.9-7.9)  |       |  |
| Fast food $\leq$ 2         |      |                 |       |               |       |  |
| times/week                 |      |                 |       |               |       |  |
| Yes                        | 264  | 10.0(6.8-14.3)  | 0.095 | 5.4(3.2-9.1)  | 0.402 |  |
| No                         | 1561 | 13.9(12.3-15.8) |       | 5.7(4.6-7.1)  |       |  |
| Slowness in eating         |      |                 |       |               |       |  |
| Yes                        | 1174 | 16.5(13.8-19.7) | 0.004 | 6.2(4.5-8.5)  | 0.496 |  |
| No                         | 651  | 11.6(9.9-13.6)  |       | 5.4(4.1-6.9)  |       |  |
| Picky eating               |      |                 |       |               |       |  |
| Yes                        | 1133 | 14.8(12.8-17.1) | 0.028 | 6.7(5.3-8.4)  | 0.027 |  |
| No                         | 692  | 11.1(8.9-13.7)  |       | 4.0(2.7-5.9)  |       |  |
| Exercise                   |      |                 |       |               |       |  |
| Never                      | 451  | 15.9(12.7-19.6) | 0.194 | 4.2(2.6-6.7)  | 0.315 |  |
| Sometimes                  | 478  | 12(9.3-15.3)    |       | 6.6(4.6-9.4)  |       |  |
| Often                      | 896  | 12.8(10.7-15.2) |       | 5.8(4.4-7.7)  |       |  |
| Highest parental education |      |                 |       |               |       |  |
| Primary school or lower    | 95   | 8.0(3.8-15.8)   | 0.196 | 8.0(3.8-15.8) | 0.724 |  |
| Junior high school         | 799  | 13.0(10.8-15.6) |       | 5.1(3.7-7.1)  |       |  |
| Senior high school         | 468  | 15.8(12.7-19.5) |       | 6.0(4.1-8.8)  |       |  |
| University or above        | 463  | 12.7(9.9-16.2)  |       | 5.7(3.8-8.4)  |       |  |
| Sleep (hours/night)        |      |                 |       |               |       |  |
| <8                         | 884  | 13.6(11.5-16.1) | 0.809 | 5.3(3.9-7.2)  | 0.302 |  |
| $\geq$ 8                   | 861  | 13.3(11.1-15.8) |       | 5.6(4.2-7.5)  |       |  |
| >10                        | 80   | 11.0(5.6-20.4)  |       | 9.7(4.7-19.0) |       |  |
| Paternal weight            |      |                 |       |               |       |  |
| Normal                     | 827  | 15.4(13.1-18.1) | 0.018 | 7.6(6.0-9.8)  | 0.002 |  |
| Ow or ob                   | 998  | 11.6(9.6-13.7)  |       | 3.8(2.7-5.4)  |       |  |
| Maternal weight            |      |                 |       |               |       |  |
| Normal                     | 1099 | 14.8(13.0-16.8) | 0.006 | 5.6(4.4-7.0)  | 0.807 |  |
| Ow or ob                   | 726  | 8.5(6.1-11.7)   |       | 5.8(3.9-8.7)  |       |  |

214 Note: *PR* (%), Prevalence rate; Ow or ob, Overweight or obese

215 To facilitate regression analysis, we divided the participants into two groups:

216 underweight and normal and overweight and obese. Table 2 shows the univariate  
 217 analysis of correlates of overweight and obesity in adolescents. As impressively  
 218 demonstrated in this table, the following factors all showed significant differences  
 219 between two groups: sex, age, birth history, frequency of eating fruits, eating habits  
 220 (slowness in eating, picky eating), and parental weights ( $P < 0.05$ ). According to the  
 221 results, we added all these significant factors to a forward stepwise multivariate  
 222 logistic regression model.

223 **Table 2**

224 **Univariate analysis of correlates of overweight and obesity in adolescents in Changchun**

| Variables                        | <i>p</i> | <i>OR</i> | 95% <i>CI</i> |
|----------------------------------|----------|-----------|---------------|
| Sex                              |          |           |               |
| Female                           | <0.001   | 1         |               |
| Male                             |          | 2.13      | 1.66-2.72     |
| Area                             |          |           |               |
| Urban                            | 0.256    | 1         |               |
| Rural                            |          | 1.15      | 0.90-1.47     |
| Age                              |          |           |               |
| <13                              | 0.070    | 1         |               |
| 13-15                            | 0.041    | 0.67      | 0.45-0.98     |
| >15                              | 0.339    | 0.81      | 0.53-1.24     |
| Birth history                    |          |           |               |
| Full-term birth                  | 0.008    | 1         |               |
| Preterm birth                    | 0.004    | 0.40      | 0.21-0.74     |
| Post-term birth                  | 0.209    | 0.63      | 0.31-1.29     |
| Fresh fruits $\leq 2$ times/week |          |           |               |
| Yes                              | 0.003    | 1         |               |
| No                               |          | 1.46      | 1.13-1.87     |
| Dessert $\leq 2$ times/week      |          |           |               |
| Yes                              | 1.197    | 1         |               |
| No                               |          | 1.17      | 0.92-1.49     |
| Breakfast $\leq 2$ times /week   |          |           |               |
| Yes                              | 0.15     | 1         |               |
| No                               |          | 0.79      | 0.57-1.09     |



|                                |                         |       |      |           |
|--------------------------------|-------------------------|-------|------|-----------|
| Fast food $\leq$ 2 times /week |                         |       |      |           |
|                                | Yes                     | 0.135 | 1    |           |
|                                | No                      |       | 1.32 | 0.92-1.91 |
| Slowness in eating             |                         |       |      |           |
|                                | Yes                     | 0.007 | 1    |           |
|                                | No                      |       | 0.71 | 0.56-0.91 |
| Picky eating                   |                         |       |      |           |
|                                | Yes                     | 0.004 | 1    |           |
|                                | No                      |       | 0.69 | 0.53-0.88 |
| Exercise                       |                         |       |      |           |
|                                | Never                   | 0.74  | 1    |           |
|                                | Sometimes               | 0.502 | 0.89 | 0.64-1.25 |
|                                | Often                   | 0.484 | 0.90 | 0.67-1.21 |
| Highest parental education     |                         |       |      |           |
|                                | Primary school or lower | 0.411 | 1    |           |
|                                | Junior high school      | 0.594 | 1.18 | 0.65-2.14 |
|                                | Senior high school      | 0.229 | 1.45 | 0.79-2.68 |
|                                | University or above     | 0.58  | 1.19 | 0.64-2.21 |
| Sleep (hours/night)            |                         |       |      |           |
|                                | <8                      | 0.964 | 1    |           |
|                                | $\geq$ 8                | 0.952 | 0.99 | 0.78-1.27 |
|                                | >10                     | 0.805 | 1.08 | 0.60-1.94 |
| Paternal weight                |                         |       |      |           |
|                                | Normal                  | 0.001 | 1    |           |
|                                | Ow or ob                |       | 0.64 | 0.51-0.83 |
| Maternal weight                |                         |       |      |           |
|                                | Normal                  | 0.011 | 1    |           |
|                                | Ow or ob                |       | 0.67 | 0.49-0.91 |

225 Note: Ow or ob, Overweight or obesity

226 Table 3 shows the results of logistic regression models comparing the prevalence of  
 227 the potential risk factors: sex, age, birth history, frequency of eating fruits, dietary  
 228 habits (slowness in eating, picky eating) and parental weight. In this forward stepwise  
 229 multivariate logistic regression model, males were more likely to be overweight and  
 230 obese than females (OR=1.91, 95% CI: 1.48-2.50). Students aged 13-15 years  
 231 (OR=0.63, 95% CI: 0.42-0.96) were less likely to be overweight than those aged

11-12 years. Compared with full-term birth, preterm birth (OR=0.45, 95% CI: 0.24-0.85) was associated with normal weight. Participants who ate fruit more than twice a week (OR=1.41, 95% CI: 1.09-1.84) were more likely to be overweight or obese. Moreover, the prevalence of overweight was higher in students who ate quickly (OR=1.37, 95% CI: 1.06-1.78) than those who ate slowly. Students who were not picky (OR=0.69, 95%CI: 0.53-0.90) were less likely to be overweight than the subjects who ate a healthy diet.

### Table 3

#### Multivariate regression analysis of correlates of overweight and obesity in

#### Changchun

| Variables                        | <i>p</i> | $\beta$ | SE   | OR   | 95% CI    |
|----------------------------------|----------|---------|------|------|-----------|
| Sex                              |          |         |      |      |           |
| Female                           |          |         |      | 1    |           |
| Male                             | <0.001   | 0.65    | 0.13 | 1.91 | 1.48-2.50 |
| Age                              |          |         |      |      |           |
| <13                              |          |         |      | 1    |           |
| 13-15                            | 0.030    | -0.46   | 0.21 | 0.63 | 0.42-0.96 |
| >15                              | 0.121    | -0.35   | 0.23 | 0.70 | 0.45-1.10 |
| Birth history                    |          |         |      |      |           |
| Full-term birth                  |          |         |      | 1    |           |
| Preterm birth                    | 0.014    | -0.80   | 0.33 | 0.45 | 0.24-0.85 |
| Post-term birth                  | 0.337    | -0.36   | 0.37 | 0.70 | 0.34-1.45 |
| Fresh fruits $\leq$ 2 times/week |          |         |      |      |           |
| Yes                              |          |         |      | 1    |           |
| No                               | 0.010    | 0.35    | 0.14 | 1.41 | 1.09-1.84 |
| Slowness in eating               |          |         |      |      |           |
| Yes                              |          |         |      | 1    |           |
| No                               | 0.016    | 0.32    | 0.13 | 1.37 | 1.06-1.78 |
| Picky eating                     |          |         |      |      |           |
| Yes                              |          |         |      | 1    |           |
| No                               | 0.007    | -0.37   | 0.14 | 0.69 | 0.53-0.90 |
| Paternal weight                  |          |         |      |      |           |

|  |                 |       |       |      |      |           |
|--|-----------------|-------|-------|------|------|-----------|
|  | Normal          |       |       |      | 1    |           |
|  | Ow or ob        | 0.002 | -0.41 | 0.13 | 0.67 | 0.51-0.83 |
|  | Maternal weight |       |       |      |      |           |
|  | Normal          |       |       |      |      |           |
|  | Ow or ob        | 0.049 | -0.32 | 0.17 | 0.72 | 0.53-0.99 |

242 Note: Ow or ob, Overweight or obese

## 243 Discussion

244 To describe the epidemiology of overweight and obesity in Changchun City and  
 245 analyze the influencing factors in adolescents, we conducted this survey of middle  
 246 school students aged 11–18 years from urban and rural areas. We found that sex,  
 247 dietary habits and parental weight had a significant impact on the children's weight.

248 Based on the data, we found that the prevalence of overweight was 12.7% (male  
 249 17.4%; female 10.1%) and that the prevalence of obesity was 4.9% (male 8.8%;  
 250 female 3.1%) among adolescents in Changchun City, Jilin Province. However, in  
 251 recent studies, the overall prevalence of obesity in school-aged children in Xi'an was  
 252 4.11%, and the rate of overweight was 6.6% among Nanjing adolescents; these rates  
 253 were both lower than the corresponding rates in Changchun. This difference may be  
 254 caused by the sample size, sex, and age of the studied population [24, 25]. In addition,  
 255 demographic distribution and environmental factors are probable factors [26]. The  
 256 economy in northeast China is less developed than that in east and south China to  
 257 some extent [27]. Rates of overweight and obesity in rural areas were also higher in  
 258 the north than that in the south [28]. Depending on the season, people in the north  
 259 might eat high-energy foods to combat the cold, which is referred to “energy balance

1  
2  
3  
4 260 related behaviors [29, 30]". In our data, boys were more often obese than girls, in  
5  
6  
7 261 general, which was in agreement with previous Chinese reports [30-32]. A Swedish  
8  
9  
10 262 report [33] predicted that there was an alarming increase in the prevalence of  
11  
12 263 overweight and obesity among adolescent boys, which was consistent with our  
13  
14  
15 264 finding. On the one hand, in traditional Chinese culture, the preference for boys may  
16  
17  
18 265 be the reason for the differences in diet, and the elderly believe that fat boys are more  
19  
20  
21 266 powerful than thin boys. On the other hand, well-groomed and fit girls are more  
22  
23  
24 267 favored by Chinese society [34-36]. Girls also tend to be more concerned about their  
25  
26  
27 268 weight than boys.

28  
29 269 We also found that adolescents who were picky, ate more fruits in general and ate  
30  
31  
32 270 quickly were more likely to be overweight or obese according to our survey. In recent  
33  
34  
35 271 reports [37, 38], a greater fruit intake was a protective factor against overweight,  
36  
37  
38 272 which was opposite of our result. Fructose, which is ubiquitous found in fruit and  
39  
40  
41 273 sugar-sweetened beverages, is one of the factors contributing to rising obesity rates  
42  
43  
44 274 [39, 40]. High intakes of fructose may decrease the abundance of the bacterial species  
45  
46  
47 275 *Eubacterium eligens*, reduce metabolism of monosaccharide and lose the ability to  
48  
49  
50 276 consume large amounts of fat [41]. The fructose intake threshold of adolescents is  
51  
52  
53 277 currently average 75g/d. If teenagers get too much fructose without consuming  
54  
55  
56 278 glycogen in time, fructose will be converted into fat at a higher rate [42, 43]. Based on  
57  
58  
59 279 the results of our study, it was reasonable to speculate that the children were already  
60  
280 full in addition to the excessive intake of fruits with high sugar content. However, the

1  
2  
3  
4 281 heavy study demand in China makes the children fail to consume the extra energy  
5  
6  
7 282 through exercise, thus leading to the possibility of being overweight. Further research  
8  
9  
10 283 should be conducted to validate the conclusion.

11  
12 284 According to the present cross-sectional study [44], food preference was an  
13  
14  
15 285 independent risk factor for overweight among children. It is known that children who  
16  
17  
18 286 had selectivity for a particular kind of food would prefer more fast food, snacks, and  
19  
20  
21 287 sugary beverage [45] and fewer fruits and vegetables [46]. However, the frequency of  
22  
23  
24 288 dessert and fast food consumption had no significant effect in our study, perhaps  
25  
26  
27 289 because the data were provided by parents or guardians who provided an inaccurate  
28  
29  
30 290 account of how often their children ate sweets and fast food. Currently, several studies  
31  
32  
33 291 have considered that food intake is a primary factor that determines body weight  
34  
35  
36 292 [47-49]. Y Li et al. concluded that excessive intake of cooking oil might be one of the  
37  
38  
39 293 risk factors for overweight [22]. Consistent with a previous study in Tianjin [47],  
40  
41  
42 294 overweight students preferred significantly more sweet foods and take-out food than  
43  
44  
45 295 their counterparts with normal weight. The result might be influenced by many  
46  
47  
48 296 elements, such as peer influence, food price, convenience, and online influence and so  
49  
50  
51 297 on, based on a recent report [50]. To decrease the prevalence of overweight and  
52  
53  
54 298 obesity, a series of interventions have been implemented, such as controlling TV time  
55  
56  
57 299 and increasing sport time.

58  
59 300 In our research, we found that if fathers and mothers were overweight, adolescents  
60  
301 were less likely to be overweight, which was inconsistent with the previous

1  
2  
3  
4 302 conclusions [51-53]. Studies [54, 55] have found that a higher BMI of the father  
5  
6  
7 303 increased the risk of overweight/ obesity among males and females. However, this  
8  
9  
10 304 finding was not consistent across studies. In a previous study, the researchers found  
11  
12 305 that the relationship between parents' and children's BMI did not exist when  
13  
14  
15 306 longitudinal analyses of changes in BMI over four years were performed [56]. This  
16  
17  
18 307 may explain why a short period of periodic surveys alone does not fully demonstrate a  
19  
20  
21 308 parent-child link to obesity, and we still need long-term research to further explore the  
22  
23  
24 309 relationship between the two factors. Berge JM et al. found that overweight or obese  
25  
26  
27 310 parents were more likely to adopt a strict dietary restriction to prevent adolescent  
28  
29  
30 311 obesity [57]. Moreover, children's growing environment and living habits will also  
31  
32  
33 312 affect their own obesity level, which will have an impact on our results [50]. Further  
34  
35  
36 313 prospective studies that assess both energy expenditure and energy intake in children  
37  
38  
39 314 are more likely to clarify this concept.  
40  
41  
42 315 However, some potential limitations exist in this cross-sectional study. The contents  
43  
44  
45 316 of the questionnaire were most recalled by the parents or guardians and there might be  
46  
47  
48 317 information bias in this survey. In addition, we set the classification standard of eating  
49  
50  
51 318 fruit frequency as "eating fruit 2 days a week" combined with the questionnaire data  
52  
53  
54 319 recalled by the parents or guardians, which may not be appropriate, so different  
55  
56  
57 320 results could have been obtained. Further research should be conducted to validate the  
58  
59  
60 321 conclusion.

## 322 **Conclusions**

1  
2  
3  
4 323 In summary, in this cross-sectional study, we found that the prevalence of overweight  
5  
6  
7 324 and obesity among adolescents in Changchun, Jilin Province was high. Sex, age, birth  
8  
9  
10 325 history, dietary habits, and parental weight were important factors for overweight and  
11  
12 326 obesity in adolescents. Therefore, reasonable lifestyle and effective weight control are  
13  
14  
15 327 necessary to prevent overweight and obesity in adolescents. There are still several  
16  
17  
18 328 limitations in this study, and we need to obtain more accurate information and  
19  
20 329 perform more specific analysis. Further research should be conducted on the health of  
21  
22  
23 330 adolescents in China and further intervention measures should be implemented to  
24  
25  
26 331 decrease the prevalence of overweight and obesity.

## 332 **Acknowledgements**

333 Thanks to all those who helped with the investigation and the participants.

## 334 **Footnotes**

335 **Contributors:** RD, CK and HY conceived the study, participated in the design of the  
336 study. HY, JJ and XL collected data. RD carried out the measurements, analyzed the  
337 data and drafted the manuscript. XY and BZ participated in the coordination of the  
338 study and interpreted the data. WB and YL revised the manuscript. All authors have  
339 approved the final article.

340 **Funding:** This study was supported by the National Key Research and Development  
341 Program (2016YFC1300100) and the National Natural Science Foundation of China

1  
2  
3  
4 342 (Grant Number: 81300062).  
5  
6

7 343 **Competing interests:** None declared.  
8

9 344 **Ethical approval:** The investigation was conducted by the First Hospital of Jilin  
10 University in April 2016, our data collected from the questionnaire in the survey as  
11  
12 345 well. The study was approved by the ethics committee of the First Hospital of Jilin  
13  
14 346 well. The study was approved by the ethics committee of the First Hospital of Jilin  
15  
16 347 University (Reference Number: 2013-031). The investigation has received informed  
17  
18 348 consent from students and parents.  
19  
20  
21  
22

23 349 **Data sharing:** Data referenced in this study are available in the project titled “Effect  
24  
25 350 and mechanism of weight loss on upper airway collapsibility in obese patients with  
26  
27 351 OSAS”. We selected a portion of the data from the database, including body  
28  
29 352 measurements of adolescents from six middle schools in Changchun City. The data  
30  
31 353 that support the findings of this study are available on request from the corresponding  
32  
33 354 author [HY]. The data are not publicly available because they contain information that  
34  
35 355 could compromise research participant privacy or consent.  
36  
37  
38  
39  
40  
41  
42

## 43 356 **References**

- 44  
45  
46  
47 357 1 Worldwide trends in body-mass index, underweight, overweight, and obesity from  
48 358 1975 to 2016: a pooled analysis of 2416 population-based measurement  
49 359 studies in 128.9 million children, adolescents, and adults. *Lancet (London,*  
50 360 *England)* 2017;390(10113):2627-42. doi: 10.1016/s0140-6736(17)32129-3  
51 361 [published Online First: 2017/10/17]  
52  
53 362 2 Global Health Observatory Data Repository. 2017. Available  
54 363 online:<http://apps.who.int/gho/data/view.main.BMIPLUS2C10-19v?lang=en>  
55 364 (accessed on 29 September 2017)  
56  
57 365 3 Jiang Y, Wang J, Wu S, et al. Association between Take-Out Food Consumption and  
58 366 Obesity among Chinese University Students: A Cross-Sectional Study.  
59  
60



- 1  
2  
3 367 *International journal of environmental research and public health* 2019;16(6)  
4 368 doi: 10.3390/ijerph16061071 [published Online First: 2019/04/03]  
5  
6 369 4 Rong Y, Niu CY, Zhao HX, et al. Association of Adolescent Obesity with Nonalcoholic  
7 370 Fatty Liver Disease and Related Risk Factors in Xi 'an, China. *Annals of*  
8 371 *Hepatology Official Journal of the Mexican Association of Hepatology*  
9 372 2018;17(1):85-91.  
10  
11 373 5 Lisan Q, Van Sloten T, Marques Vidal P, et al. Association of Positive Airway  
12 374 Pressure Prescription With Mortality in Patients With Obesity and Severe  
13 375 Obstructive Sleep Apnea: The Sleep Heart Health Study. *JAMA*  
14 376 *otolaryngology-- head & neck surgery* 2019 doi: 10.1001/jamaoto.2019.0281  
15 377 [published Online First: 2019/04/12]  
16  
17 378 6 Lai SH, Tsai YW, Chen YC, et al. Obesity, hyperhomocysteinaemia and risk of  
18 379 chronic kidney disease: a population-based study. *Family Practice* 2017;35(3)  
19 380  
20 381 7 Sabanayagam C, Wong TY, Liao J, et al. Body mass index and preclinical kidney  
21 382 disease in Indian adults aged 40 years and above without chronic kidney  
22 383 disease. *Clinical and experimental nephrology* 2014;18(6):919-24. doi:  
23 384 10.1007/s10157-014-0945-6 [published Online First: 2014/02/15]  
24 385  
25 386 8 Addo PN, Nyarko KM, Sackey SO, et al. Prevalence of obesity and overweight and  
26 387 associated factors among financial institution workers in Accra Metropolis,  
27 388 Ghana: a cross sectional study. *BMC research notes* 2015;8:599. doi:  
28 389 10.1186/s13104-015-1590-1 [published Online First: 2015/10/27]  
29 390  
30 391 9 Sun H, Ma Y, Han D, et al. Prevalence and trends in obesity among China's children  
31 392 and adolescents, 1985-2010. *PloS one* 2014;9(8):e105469. doi:  
32 393 10.1371/journal.pone.0105469 [published Online First: 2014/08/21]  
33 394  
34 395 10 Zhang X, Zhang F, Yang J, et al. Prevalence of overweight and obesity among  
35 396 primary school-aged children in Jiangsu Province, China, 2014-2017. *PloS one*  
36 397 2018;13(8):e0202681. doi: 10.1371/journal.pone.0202681 [published Online  
37 398 First: 2018/08/24]  
38 399  
39 400 11 Ma Y, Peng L, Kou C, et al. Associations of Overweight, Obesity and Related  
40 401 Factors with Sleep-Related Breathing Disorders and Snoring in Adolescents: A  
41 402 Cross-Sectional Survey. *International journal of environmental research and*  
42 403 *public health* 2017;14(2) doi: 10.3390/ijerph14020194 [published Online  
43 404 First: 2017/02/18]  
44 405  
45 406 12 Rangan A, Zheng M, Olsen NJ, et al. Shorter sleep duration is associated with  
46 407 higher energy intake and an increase in BMI z-score in young children  
47 408 predisposed to overweight. *International journal of obesity (2005)*  
48 409 2018;42(1):59-64. doi: 10.1038/ijo.2017.216 [published Online First:  
49 410 2017/09/09]  
50 411  
51 412 13 Dello Russo M, Ahrens W, De Henauw S, et al. The Impact of Adding Sugars to  
52 413 Milk and Fruit on Adiposity and Diet Quality in Children: A Cross-Sectional  
53 414 and Longitudinal Analysis of the Identification and Prevention of Dietary- and  
54 415 Lifestyle-Induced Health Effects in Children and Infants (IDEFICS) Study.  
55 416  
56 417  
57 418  
58 419  
59 420  
60

- 1  
2  
3 409 *Nutrients* 2018;10(10) doi: 10.3390/nu10101350 [published Online First:  
4 410 2018/09/27]  
5  
6 411 14 Wang H, Zhai F. Programme and policy options for preventing obesity in China.  
7 412 *Obesity Reviews* 2013;14(S2):134-40. doi: 10.1111/obr.12106  
8  
9 413 15 Force. GoCOT. [Body mass index reference norm for screening overweight and  
10 414 obesity in Chinese children and adolescents]. *Zhonghua liu xing bing xue za*  
11 415 *zhi = Zhonghua liuxingbingxue zazhi* 2004;25(2):97-102. [published Online  
12 416 First: 2004/05/11]  
13  
14 417 16 Zhou L, Zeng Q, Jin S, et al. The impact of changes in dietary knowledge on adult  
15 418 overweight and obesity in China. *PloS one* 2017;12(6):e0179551. doi:  
16 419 10.1371/journal.pone.0179551 [published Online First: 2017/06/24]  
17  
18 420 17 Wang R, Zhang P, Gao C, et al. Prevalence of overweight and obesity and some  
19 421 associated factors among adult residents of northeast China: a  
20 422 cross-sectional study. *BMJ open* 2016;6(7):e010828. doi:  
21 423 10.1136/bmjopen-2015-010828 [published Online First: 2016/07/28]  
22  
23 424 18 Slack E, Best KE, Rankin J, et al. Maternal obesity classes, preterm and post-term  
24 425 birth: a retrospective analysis of 479,864 births in England. *BMC pregnancy*  
25 426 *and childbirth* 2019;19(1):434. doi: 10.1186/s12884-019-2585-z [published  
26 427 Online First: 2019/11/23]  
27  
28 428 19 Wang SS, Lay S, Yu HN, et al. Dietary Guidelines for Chinese Residents (2016):  
29 429 comments and comparisons. *Journal of Zhejiang University Science B*  
30 430 2016;17(9):649-56. doi: 10.1631/jzus.B1600341 [published Online First:  
31 431 2016/09/09]  
32  
33 432 20 Antoniou EE, Roefs A, Kremers SP, et al. Picky eating and child weight status  
34 433 development: a longitudinal study. *Journal of human nutrition and dietetics :*  
35 434 *the official journal of the British Dietetic Association* 2016;29(3):298-307. doi:  
36 435 10.1111/jhn.12322 [published Online First: 2015/05/20]  
37  
38 436 21 Oberle MM, Romero Willson S, Gross AC, et al. Relationships among Child Eating  
39 437 Behaviors and Household Food Insecurity in Youth with Obesity. *Childhood*  
40 438 *obesity (Print)* 2019;15(5):298-305. doi: 10.1089/chi.2018.0333 [published  
41 439 Online First: 2019/05/16]  
42  
43 440 22 Li Y, Zhai F, Yang X, et al. Determinants of childhood overweight and obesity in  
44 441 China. *The British journal of nutrition* 2007;97(1):210-5. doi:  
45 442 10.1017/s0007114507280559 [published Online First: 2007/01/16]  
46  
47 443 23 Kelley GA, Kelley KS. Exercise and BMI z-score in overweight and obese children  
48 444 and adolescents: protocol for a systematic review and network meta-analysis  
49 445 of randomised trials. *BMJ open* 2016;6(4):e011258. doi:  
50 446 10.1136/bmjopen-2016-011258 [published Online First: 2016/04/17]  
51  
52 447 24 Xu F, Li J, Ware RS, et al. Associations of television viewing time with excess body  
53 448 weight among urban and rural high-school students in regional mainland  
54 449 China. *Public health nutrition* 2008;11(9):891-6. doi:  
55 450 10.1017/s1368980007001280 [published Online First: 2007/11/17]  
56  
57  
58  
59  
60

- 1  
2  
3 451 25 Yi X, Yin C, Chang M, et al. Prevalence and risk factors of obesity among  
4 452 school-aged children in Xi'an, China. *European journal of pediatrics*  
5 453 2012;171(2):389-94. doi: 10.1007/s00431-011-1566-7 [published Online First:  
6 454 2011/09/14]  
7  
8 455 26 Hu L, Huang X, You C, et al. Prevalence of overweight, obesity, abdominal obesity  
9 456 and obesity-related risk factors in southern China. *PloS one*  
10 457 2017;12(9):e0183934. doi: 10.1371/journal.pone.0183934 [published Online  
11 458 First: 2017/09/15]  
12  
13 459 27 Li P, Jiang R, Li L, et al. Prevalence and risk factors of metabolic syndrome in  
14 460 school adolescents of northeast China. *Journal of pediatric endocrinology &*  
15 461 *metabolism : JPEM* 2014;27(5-6):525-32. doi: 10.1515/jpem-2013-0336  
16 462 [published Online First: 2014/05/14]  
17  
18 463 28 Reynolds K, Gu D, Whelton PK, et al. Prevalence and Risk Factors of Overweight  
19 464 and Obesity in China\*. *Obesity* 2012;15(1):10-18.  
20  
21 465 29 Zhuo Q, Wang Z, Piao J, et al. Geographic variation in the prevalence of  
22 466 overweight and economic status in Chinese adults. *The British journal of*  
23 467 *nutrition* 2009;102(3):413-8. doi: 10.1017/s0007114508184732 [published  
24 468 Online First: 2009/01/14]  
25  
26 469 30 Jia P, Xue H, Zhang J, et al. Time Trend and Demographic and Geographic  
27 470 Disparities in Childhood Obesity Prevalence in China-Evidence from Twenty  
28 471 Years of Longitudinal Data. *International journal of environmental research*  
29 472 *and public health* 2017;14(4) doi: 10.3390/ijerph14040369 [published Online  
30 473 First: 2017/04/01]  
31  
32 474 31 Jia P, Li M, Xue H, et al. School environment and policies, child eating behavior  
33 475 and overweight/obesity in urban China: the childhood obesity study in China  
34 476 megacities. *International journal of obesity (2005)* 2017;41(5):813-19. doi:  
35 477 10.1038/ijo.2017.2 [published Online First: 2017/01/12]  
36  
37 478 32 Zhang Y, Zhao J, Chu Z, et al. Increasing prevalence of childhood overweight and  
38 479 obesity in a coastal province in China. *Pediatric obesity* 2016;11(6):e22-e26.  
39 480 doi: 10.1111/ijpo.12070 [published Online First: 2015/09/26]  
40  
41 481 33 Eriksson M, Lingfors H, Golsater M. Trends in prevalence of thinness, overweight  
42 482 and obesity among Swedish children and adolescents between 2004 and  
43 483 2015. *Acta paediatrica (Oslo, Norway : 1992)* 2018;107(10):1818-25. doi:  
44 484 10.1111/apa.14356 [published Online First: 2018/04/11]  
45  
46 485 34 Li J, Lei J, Wen S, et al. Sex disparity and perception of obesity/overweight by  
47 486 parents and grandparents. *Paediatrics & child health* 2014;19(7):e113-6. doi:  
48 487 10.1093/pch/19.7.e113 [published Online First: 2014/10/22]  
49  
50 488 35 Zhang J, Wang H, Wang Z, et al. Prevalence and stabilizing trends in overweight  
51 489 and obesity among children and adolescents in China, 2011-2015. *BMC public*  
52 490 *health* 2018;18(1):571. doi: 10.1186/s12889-018-5483-9 [published Online  
53 491 First: 2018/05/03]  
54  
55 492 36 Zhai L, Dong Y, Bai Y, et al. Trends in obesity, overweight, and malnutrition among  
56  
57  
58  
59  
60

- 1  
2  
3 493 children and adolescents in Shenyang, China in 2010 and 2014: a multiple  
4 cross-sectional study. *BMC public health* 2017;17(1):151. doi:  
5 494 10.1186/s12889-017-4072-7 [published Online First: 2017/02/06]  
6  
7 496 37 You J, Choo J. Adolescent Overweight and Obesity: Links to Socioeconomic Status  
8 and Fruit and Vegetable Intakes. *International journal of environmental*  
9 497 *research and public health* 2016;13(3) doi: 10.3390/ijerph13030307  
10 498 [published Online First: 2016/03/24]  
11 499  
12 500 38 Tohill BC, Seymour J, Serdula M, et al. What epidemiologic studies tell us about  
13 the relationship between fruit and vegetable consumption and body weight.  
14 501 *Nutrition reviews* 2004;62(10):365-74. doi:  
15 502 10.1111/j.1753-4887.2004.tb00007.x [published Online First: 2004/10/29]  
16 503  
17 504 39 Qi X, Tester RF. Fructose, galactose and glucose - In health and disease. *Clinical*  
18 505 *nutrition ESPEN* 2019;33:18-28. doi: 10.1016/j.clnesp.2019.07.004 [published  
19 506 Online First: 2019/08/28]  
20  
21 507 40 Choo VL, Viguiliouk E, Blanco Mejia S, et al. Food sources of fructose-containing  
22 508 sugars and glycaemic control: systematic review and meta-analysis of  
23 509 controlled intervention studies. *BMJ (Clinical research ed)* 2018;363:k4644.  
24 510 doi: 10.1136/bmj.k4644 [published Online First: 2018/11/23]  
25  
26 511 41 Jones RB, Alderete TL, Kim JS, et al. High intake of dietary fructose in  
27 512 overweight/obese teenagers associated with depletion of Eubacterium and  
28 513 Streptococcus in gut microbiome. *Gut microbes* 2019;10(6):712-19. doi:  
29 514 10.1080/19490976.2019.1592420 [published Online First: 2019/04/18]  
30  
31 515 42 Lustig RH. Fructose: it's "alcohol without the buzz". *Advances in nutrition*  
32 516 *(Bethesda, Md)* 2013;4(2):226-35. doi: 10.3945/an.112.002998 [published  
33 517 Online First: 2013/03/16]  
34  
35 518 43 Aller EE, Abete I, Astrup A, et al. Starches, sugars and obesity. *Nutrients*  
36 519 2011;3(3):341-69. doi: 10.3390/nu3030341 [published Online First:  
37 520 2012/01/19]  
38  
39 521 44 Xiong LH, Wang CL, Chen ZQ, et al. [Study on food preference and dietary  
40 522 behavior to overweight/obesity in school children and adolescents in  
41 523 Guangzhou: a case-control study]. *Zhonghua liu xing bing xue za zhi =*  
42 524 *Zhonghua liuxingbingxue zazhi* 2008;29(10):965-9. [published Online First:  
43 525 2009/01/29]  
44  
45 526 45 Qiu C, Hou M. Association between Food Preferences, Eating Behaviors and  
46 527 Socio-Demographic Factors, Physical Activity among Children and  
47 528 Adolescents: A Cross-Sectional Study. *Nutrients* 2020;12(3) doi:  
48 529 10.3390/nu12030640 [published Online First: 2020/03/04]  
49  
50 530 46 Ferreira RJ, Marques-Vidal PM. Prevalence and determinants of obesity in  
51 531 children in public schools of Sintra, Portugal. *Obesity (Silver Spring, Md)*  
52 532 2008;16(2):497-500. doi: 10.1038/oby.2007.74 [published Online First:  
53 533 2008/02/02]  
54  
55 534 47 Andegiorgish AK, Wang J, Zhang X, et al. Prevalence of overweight, obesity, and  
56  
57  
58  
59  
60

- 1  
2  
3 535 associated risk factors among school children and adolescents in Tianjin,  
4 536 China. *European journal of pediatrics* 2012;171(4):697-703. doi:  
5 537 10.1007/s00431-011-1636-x [published Online First: 2011/12/14]  
6  
7 538 48 Liu J, Hay J, Faught BE, et al. Family eating and activity habits, diet quality and  
8 539 pre-adolescent overweight and obesity. *Public health* 2012;126(6):532-4. doi:  
9 540 10.1016/j.puhe.2012.02.012 [published Online First: 2012/05/09]  
10  
11 541 49 An R. Diet quality and physical activity in relation to childhood obesity.  
12 542 *International journal of adolescent medicine and health* 2017;29(2) doi:  
13 543 10.1515/ijamh-2015-0045 [published Online First: 2015/09/10]  
14  
15 544 50 Watts AW, Lovato CY, Barr SI, et al. A qualitative study exploring how school and  
16 545 community environments shape the food choices of adolescents with  
17 546 overweight/obesity. *Appetite* 2015;95:360-7. doi:  
18 547 10.1016/j.appet.2015.07.022 [published Online First: 2015/07/28]  
19  
20 548 51 Naess M, Holmen TL, Langaas M, et al. Intergenerational Transmission of  
21 549 Overweight and Obesity from Parents to Their Adolescent Offspring - The  
22 550 HUNT Study. *PloS one* 2016;11(11):e0166585. doi:  
23 551 10.1371/journal.pone.0166585 [published Online First: 2016/11/17]  
24  
25 552 52 Tu AW, Watts AW, Masse LC. Parent-Adolescent Patterns of Physical Activity,  
26 553 Sedentary Behaviors and Sleep Among a Sample of Overweight and Obese  
27 554 Adolescents. *Journal of physical activity & health* 2015;12(11):1469-76. doi:  
28 555 10.1123/jpah.2014-0270 [published Online First: 2015/01/27]  
29  
30 556 53 Brennan L, Walkley J, Wilks R. Parent- and adolescent-reported barriers to  
31 557 participation in an adolescent overweight and obesity intervention. *Obesity*  
32 558 *(Silver Spring, Md)* 2012;20(6):1319-24. doi: 10.1038/oby.2011.358  
33 559 [published Online First: 2011/12/24]  
34  
35 560 54 Jiang MH, Yang Y, Guo XF, et al. Association between child and adolescent obesity  
36 561 and parental weight status: a cross-sectional study from rural North China.  
37 562 *The Journal of international medical research* 2013;41(4):1326-32. doi:  
38 563 10.1177/0300060513480081 [published Online First: 2013/06/19]  
39  
40 564 55 Shafaghi K, Shariff ZM, Taib MN, et al. Parental body mass index is associated with  
41 565 adolescent overweight and obesity in Mashhad, Iran. *Asia Pacific journal of*  
42 566 *clinical nutrition* 2014;23(2):225-31. doi: 10.6133/apjcn.2014.23.2.11  
43 567 [published Online First: 2014/06/06]  
44  
45 568 56 Maffei C, Talamini G, Tato L. Influence of diet, physical activity and parents'  
46 569 obesity on children's adiposity: a four-year longitudinal study. *International*  
47 570 *journal of obesity and related metabolic disorders : journal of the*  
48 571 *International Association for the Study of Obesity* 1998;22(8):758-64.  
49 572 [published Online First: 1998/09/02]  
50  
51 573 57 Berge JM, Meyer CS, Loth K, et al. Parent/Adolescent Weight Status Concordance  
52 574 and Parent Feeding Practices. *Pediatrics* 2015;136(3):e591-8. doi:  
53 575 10.1542/peds.2015-0326 [published Online First: 2015/08/26]  
54  
55 576

577

For peer review only

1  
2  
3  
4  
5  
6  
7  
8  
9  
10  
11  
12  
13  
14  
15  
16  
17  
18  
19  
20  
21  
22  
23  
24  
25  
26  
27  
28  
29  
30  
31  
32  
33  
34  
35  
36  
37  
38  
39  
40  
41  
42  
43  
44  
45  
46  
47  
48  
49  
50  
51  
52  
53  
54  
55  
56  
57  
58  
59  
60



1  
2  
3  
4  
5  
6  
7  
8  
9  
10  
11  
12  
13  
14  
15  
16  
17  
18  
19  
20  
21  
22  
23  
24  
25  
26  
27  
28  
29  
30  
31  
32  
33  
34  
35  
36  
37  
38  
39  
40  
41  
42  
43  
44  
45  
46  
47  
48  
49  
50  
51  
52  
53  
54  
55  
56  
57  
58  
59  
60STROBE Statement—Checklist of items that should be included in reports of *cross-sectional studies*

|                              | Item No | Recommendation                                                                                                                                                                                    | Page/line number       |
|------------------------------|---------|---------------------------------------------------------------------------------------------------------------------------------------------------------------------------------------------------|------------------------|
| <b>Title and abstract</b>    | 1       | (a) Indicate the study's design with a commonly used term in the title or the abstract                                                                                                            | Page 1                 |
|                              |         | (b) Provide in the abstract an informative and balanced summary of what was done and what was found                                                                                               | Page 2-3, line 23-48   |
| <b>Introduction</b>          |         |                                                                                                                                                                                                   |                        |
| Background/rationale         | 2       | Explain the scientific background and rationale for the investigation being reported                                                                                                              | Page 3-5, line 61-90   |
| Objectives                   | 3       | State specific objectives, including any prespecified hypotheses                                                                                                                                  | Page 5, line 91-94     |
| <b>Methods</b>               |         |                                                                                                                                                                                                   |                        |
| Study design                 | 4       | Present key elements of study design early in the paper                                                                                                                                           | Page 5-6               |
| Setting                      | 5       | Describe the setting, locations, and relevant dates, including periods of recruitment, exposure, follow-up, and data collection                                                                   | Page 5-6               |
| Participants                 | 6       | (a) Give the eligibility criteria, and the sources and methods of selection of participants                                                                                                       | Page 5-6, line 97-104  |
| Variables                    | 7       | Clearly define all outcomes, exposures, predictors, potential confounders, and effect modifiers. Give diagnostic criteria, if applicable                                                          | Page 7-8, line 127-158 |
| Data sources/<br>measurement | 8*      | For each variable of interest, give sources of data and details of methods of assessment (measurement). Describe comparability of assessment methods if there is more than one group              | Page 6, line 107-125   |
| Bias                         | 9       | Describe any efforts to address potential sources of bias                                                                                                                                         | Page 9, line 167-172   |
| Study size                   | 10      | Explain how the study size was arrived at                                                                                                                                                         | Page 5, line 97-101    |
| Quantitative variables       | 11      | Explain how quantitative variables were handled in the analyses. If applicable, describe which groupings were chosen and why                                                                      | Page 7-8, line 127-158 |
| Statistical methods          | 12      | (a) Describe all statistical methods, including those used to control for confounding                                                                                                             | Page 8-9, line 160-172 |
|                              |         | (b) Describe any methods used to examine subgroups and interactions                                                                                                                               | Page 8-9, line 160-172 |
|                              |         | (c) Explain how missing data were addressed                                                                                                                                                       | Page 9, line 167-172   |
|                              |         | (d) If applicable, describe analytical methods taking account of sampling strategy                                                                                                                | N/A                    |
|                              |         | (e) Describe any sensitivity analyses                                                                                                                                                             | Page 8-9, line 160-172 |
| <b>Results</b>               |         |                                                                                                                                                                                                   |                        |
| Participants                 | 13*     | (a) Report numbers of individuals at each stage of study—eg numbers potentially eligible, examined for eligibility, confirmed eligible, included in the study, completing follow-up, and analysed | Page 10, line 186-192  |
|                              |         | (b) Give reasons for non-participation at each stage                                                                                                                                              | N/A                    |
|                              |         | (c) Consider use of a flow diagram                                                                                                                                                                | N/A                    |
| Descriptive data             | 14*     | (a) Give characteristics of study participants (eg demographic, clinical, social) and information on exposures and potential                                                                      | Page 9-10              |

|                          |     |                                                                                                                                                                                                              |                          |
|--------------------------|-----|--------------------------------------------------------------------------------------------------------------------------------------------------------------------------------------------------------------|--------------------------|
|                          |     | confounders                                                                                                                                                                                                  |                          |
|                          |     | (b) Indicate number of participants with missing data for each variable of interest                                                                                                                          | Page 10, line 186-190    |
| Outcome data             | 15* | Report numbers of outcome events or summary measures                                                                                                                                                         | Page10, line 186-192     |
| Main results             | 16  | (a) Give unadjusted estimates and, if applicable, confounder-adjusted estimates and their precision (eg, 95% confidence interval). Make clear which confounders were adjusted for and why they were included | Page 11-12               |
|                          |     | (b) Report category boundaries when continuous variables were categorized                                                                                                                                    | N/A                      |
|                          |     | (c) If relevant, consider translating estimates of relative risk into absolute risk for a meaningful time period                                                                                             | N/A                      |
| Other analyses           | 17  | Report other analyses done—eg analyses of subgroups and interactions, and sensitivity analyses                                                                                                               | Page 12-15               |
| <b>Discussion</b>        |     |                                                                                                                                                                                                              |                          |
| Key results              | 18  | Summarise key results with reference to study objectives                                                                                                                                                     | Page 16, line 240-243    |
| Limitations              | 19  | Discuss limitations of the study, taking into account sources of potential bias or imprecision. Discuss both direction and magnitude of any potential bias                                                   | Page 19, line 310-316    |
| Interpretation           | 20  | Give a cautious overall interpretation of results considering objectives, limitations, multiplicity of analyses, results from similar studies, and other relevant evidence                                   | Page 15-19               |
| Generalisability         | 21  | Discuss the generalisability (external validity) of the study results                                                                                                                                        | Page 19-20, line 318-326 |
| <b>Other information</b> |     |                                                                                                                                                                                                              |                          |
| Funding                  | 22  | Give the source of funding and the role of the funders for the present study and, if applicable, for the original study on which the present article is based                                                | Page 20, line 335-337    |

\*Give information separately for exposed and unexposed groups.

**Note:** An Explanation and Elaboration article discusses each checklist item and gives methodological background and published examples of transparent reporting. The STROBE checklist is best used in conjunction with this article (freely available on the Web sites of PLoS Medicine at <http://www.plosmedicine.org/>, Annals of Internal Medicine at <http://www.annals.org/>, and Epidemiology at <http://www.epidem.com/>). Information on the STROBE Initiative is available at [www.strobe-statement.org](http://www.strobe-statement.org).



# BMJ Open

## Prevalence and correlates of overweight and obesity among adolescents in northeastern China: a cross-sectional study

|                                 |                                                                                                                                                                                                                                                                                                                                                                                                                                                                                                                                                                                                                                                                                                                                                                                                                                                                                                                                                               |
|---------------------------------|---------------------------------------------------------------------------------------------------------------------------------------------------------------------------------------------------------------------------------------------------------------------------------------------------------------------------------------------------------------------------------------------------------------------------------------------------------------------------------------------------------------------------------------------------------------------------------------------------------------------------------------------------------------------------------------------------------------------------------------------------------------------------------------------------------------------------------------------------------------------------------------------------------------------------------------------------------------|
| Journal:                        | <i>BMJ Open</i>                                                                                                                                                                                                                                                                                                                                                                                                                                                                                                                                                                                                                                                                                                                                                                                                                                                                                                                                               |
| Manuscript ID                   | bmjopen-2020-036820.R3                                                                                                                                                                                                                                                                                                                                                                                                                                                                                                                                                                                                                                                                                                                                                                                                                                                                                                                                        |
| Article Type:                   | Original research                                                                                                                                                                                                                                                                                                                                                                                                                                                                                                                                                                                                                                                                                                                                                                                                                                                                                                                                             |
| Date Submitted by the Author:   | 18-May-2020                                                                                                                                                                                                                                                                                                                                                                                                                                                                                                                                                                                                                                                                                                                                                                                                                                                                                                                                                   |
| Complete List of Authors:       | Duan, Ruixin; Jilin University School of Public Health, Department of Epidemiology and Biostatistics; Jilin University First Hospital, Pulmonary Division & Sleep Center<br>Kou, Changgui; Jilin University School of Public Health, Department of Epidemiology and Biostatistics<br>Jie, Jing; Jilin University First Hospital, Pulmonary Division & Sleep Center<br>bai , wei; Jilin University School of Public Health, Department of Epidemiology and Biostatistics<br>Lan, Xiaoxin; Jilin University First Hospital, Pulmonary Division & Sleep Center<br>Li, Yuanyuan; Jilin University School of Public Health, Department of Epidemiology and Biostatistics<br>Yu, Xiao; Jilin University School of Public Health, Department of Epidemiology and Biostatistics<br>Zhu, Bo; Jilin University School of Public Health, Department of Epidemiology and Biostatistics<br>Yuan, Haibo; Jilin University First Hospital, Pulmonary Division & Sleep Center |
| <b>Primary Subject Heading</b>: | Epidemiology                                                                                                                                                                                                                                                                                                                                                                                                                                                                                                                                                                                                                                                                                                                                                                                                                                                                                                                                                  |
| Secondary Subject Heading:      | Public health                                                                                                                                                                                                                                                                                                                                                                                                                                                                                                                                                                                                                                                                                                                                                                                                                                                                                                                                                 |
| Keywords:                       | PUBLIC HEALTH, EPIDEMIOLOGY, Risk management < HEALTH SERVICES ADMINISTRATION & MANAGEMENT                                                                                                                                                                                                                                                                                                                                                                                                                                                                                                                                                                                                                                                                                                                                                                                                                                                                    |
|                                 |                                                                                                                                                                                                                                                                                                                                                                                                                                                                                                                                                                                                                                                                                                                                                                                                                                                                                                                                                               |

SCHOLARONE™  
Manuscripts



I, the Submitting Author has the right to grant and does grant on behalf of all authors of the Work (as defined in the below author licence), an exclusive licence and/or a non-exclusive licence for contributions from authors who are: i) UK Crown employees; ii) where BMJ has agreed a CC-BY licence shall apply, and/or iii) in accordance with the terms applicable for US Federal Government officers or employees acting as part of their official duties; on a worldwide, perpetual, irrevocable, royalty-free basis to BMJ Publishing Group Ltd ("BMJ") its licensees and where the relevant Journal is co-owned by BMJ to the co-owners of the Journal, to publish the Work in this journal and any other BMJ products and to exploit all rights, as set out in our [licence](#).

The Submitting Author accepts and understands that any supply made under these terms is made by BMJ to the Submitting Author unless you are acting as an employee on behalf of your employer or a postgraduate student of an affiliated institution which is paying any applicable article publishing charge ("APC") for Open Access articles. Where the Submitting Author wishes to make the Work available on an Open Access basis (and intends to pay the relevant APC), the terms of reuse of such Open Access shall be governed by a Creative Commons licence – details of these licences and which [Creative Commons](#) licence will apply to this Work are set out in our licence referred to above.

Other than as permitted in any relevant BMJ Author's Self Archiving Policies, I confirm this Work has not been accepted for publication elsewhere, is not being considered for publication elsewhere and does not duplicate material already published. I confirm all authors consent to publication of this Work and authorise the granting of this licence.

1  
2  
3  
4 1 Prevalence and correlates of overweight and obesity  
5  
6  
7 2 among adolescents in northeastern China: a  
8  
9  
10 3 cross-sectional study  
11

12 4 Ruixin Duan<sup>1, 2</sup>, Changgui Kou<sup>1</sup>, Jing Jie<sup>2</sup>, Wei Bai<sup>1</sup>, Xiaoxin Lan<sup>2</sup>, Yuanyuan Li<sup>1</sup>,  
13  
14  
15 5 Xiao Yu<sup>1</sup>, Bo Zhu<sup>1</sup>, Haibo Yuan<sup>2\*</sup>  
16  
17

18 6

19  
20 7

21  
22  
23 8 <sup>1</sup> Department of Epidemiology and Biostatistics, School of Public Health, Jilin  
24  
25 9 University, 1163 Xinmin Street, Changchun, 130021, Jilin province, China;

26  
27  
28 10 <sup>2</sup> Pulmonary Division & Sleep Center, The First Hospital of Jilin University,  
29  
30  
31 11 Changchun, 130021, Jilin Province, China.  
32

33 12

34  
35 13

36  
37  
38 14

39  
40  
41 15

42  
43  
44 16 \*Corresponding Author:

45  
46  
47 17 Haibo Yuan<sup>2\*</sup>  
48

49  
50 18 The First Hospital of Jilin University, Changchun, 130021, Jilin Province, China  
51

52  
53 19 Email address: hyuan@jlu.edu.cn  
54

55 20 Word count: 3981  
56

57 21

58 22  
59  
60

## 23 Abstract

24 **Objectives:** To estimate the prevalence of overweight/obesity among adolescents and  
25 to evaluate the associated factors in this group in Changchun City, northeastern China.

26 **Methods:** A cross-sectional study of 1955 adolescents aged 11–18 years was  
27 conducted in Changchun City, using stratified cluster sampling. Parents and  
28 caregivers of children completed the questionnaires as requested without objection;  
29 the questionnaire included demographic characteristics and anthropometric  
30 parameters. Univariate and multivariate logistic regression analyses were performed  
31 to analyze the relationship between overweight /obesity and related factors.

32 **Results:** In total, the prevalence of overweight was 12.7% (male 17.4%; female  
33 10.1%), and the prevalence of obesity was 4.9% (male 8.8%; female 3.1%) in  
34 Changchun, Jilin Province. The prevalence of overweight and obesity was higher in  
35 males than that in females ( $P < 0.001$ ). Multivariate logistic regression showed that  
36 overweight and obesity were significantly associated with male sex (OR=1.91, 95%  
37 CI: 1.48-2.47), eating fresh fruits more than two days per week (OR=1.41, 95% CI:  
38 1.09-1.84), eating quickly (OR=1.37, 95% CI: 1.06-1.78). The students who were not  
39 picky (OR=0.69, 95% CI: 0.53-0.90) were less likely to be overweight. And  
40 adolescents whose father were overweight or obese (OR=0.67, 95% CI: 0.52-0.86) or  
41 mother were overweight or obese (OR=0.72, 95% CI: 0.52-0.99) were less likely to  
42 be overweight.

43 **Conclusion:** The prevalence of overweight and obesity among adolescents in

1  
2  
3  
4 44 Changchun was high in recent years. The prevalence of overweight and obesity  
5  
6  
7 45 among males was higher than that among females. Sex, dietary habits (weekly  
8  
9  
10 46 frequency of fruit consumption, picky eating and slowness in eating) and parental  
11  
12 47 weight were important factors for overweight and obesity in adolescents. Further  
13  
14  
15 48 research should be conducted on the health of adolescents in China and further  
16  
17  
18 49 intervention measures should be implemented to reduce the prevalence of  
19  
20  
21 50 overweight/obesity.

22  
23 **Keywords:** overweight; obesity; adolescent; association  
24  
25  
26

## 27 **Strengths and limitations of this study**

28  
29  
30

- 31 53 ● In the cross-sectional study, participants were randomly selected from rural and  
32  
33  
34 54 urban areas by stratified cluster sampling.
- 35  
36  
37 55 ● Weight category was defined using age- and sex- specific BMI cutoff points  
38  
39  
40 56 specifically developed for the Chinese adolescent population.
- 41  
42  
43 57 ● The influence of confounding factors on the results was effectively controlled by  
44  
45  
46 58 the multivariate logistic regression method.
- 47  
48  
49 59 ● Missing data from childhood measurements were handled with a mean  
50  
51  
52 60 imputation technique.
- 53  
54  
55 61 ● The contents of the questionnaire were most recalled by the parents or guardians  
56  
57  
58 62 and there might be information bias in this survey.

## 59 **Introduction**

60

1  
2  
3  
4 64 The prevalence of obesity has increased dramatically among children, adolescents and  
5  
6  
7 65 adults worldwide in recent decades [1]. Overall, the global proportion of adolescents  
8  
9  
10 66 with obesity has increased significantly from just 4% in 1975 to just over 18% in  
11  
12 67 2016 [2]. There is compelling evidence revealing a significantly higher proportion of  
13  
14  
15 68 overweight or obese adolescents in recent years, which has reached alarming levels.  
16  
17  
18 69 Recently, scholars have conducted many studies on overweight and obesity.  
19  
20  
21 70 Overweight and obesity are predisposing factors for many chronic diseases, such as  
22  
23  
24 71 type 2 diabetes, cardiovascular diseases, respiratory diseases, musculoskeletal  
25  
26  
27 72 disorders, and various types of cancer [3]. Yan R et al. found an association of  
28  
29  
30 73 adolescent obesity with nonalcoholic fatty liver disease (NAFLD) and revealed that  
31  
32  
33 74 the incidence of NAFLD increased with increasing body weight [4]. Lisan Q et al.  
34  
35  
36 75 compared patients with obesity and severe obstructive sleep apnoea (OSA) with and  
37  
38  
39 76 without prescription of positive airway pressure (PAP) therapy and found that  
40  
41  
42 77 participants with PAP prescriptions had a higher BMI (Body mass index) than  
43  
44  
45 78 participants not prescribed PAP [5]. It has been estimated that overweight and obesity  
46  
47  
48 79 are the fifth leading cause of death worldwide, accounting for nearly 3.4 million  
49  
50  
51 80 deaths annually [6]. In addition, obesity is considered a risk factor for the  
52  
53  
54 81 development of chronic kidney disease [7]. In this context, the American Medical  
55  
56  
57 82 Association classified obesity as a disease to get physicians to pay more attention to  
58  
59  
60 83 the condition [8].

1  
2  
3  
4 84 In China, the largest developing country, nearly one-third of adolescents were  
5  
6  
7 85 overweight or obese in 2016, and the obesity prevalence rate increased from 0.10% in  
8  
9  
10 86 1976 to 8.50% in 2016. Sun HP found that the prevalence of obesity and of  
11  
12 87 overweight and obesity combined was 8.1% and 19.2%, respectively, among children  
13  
14  
15 88 and adolescents at the age of 7–18 [9]. Zhang XY reported that the prevalence rates of  
16  
17 89 overweight and obesity among primary school children were 15.2% and 11.7%,  
18  
19  
20 90 respectively, in Jiangsu Province [10]. Therefore, it is of key importance to  
21  
22  
23 91 understand the risk factors for overweight and obesity to prevent adolescents from  
24  
25  
26 92 developing the disease.

27  
28 93 We investigated the physical condition of adolescents aged 11-18 years from six  
29  
30  
31 94 middle schools in Changchun which is the capital of Jilin Province. The aim of the  
32  
33  
34 95 current study was to reveal the prevalence of overweight and obesity and to analyze  
35  
36  
37 96 various associated factors among adolescents with overweight and obesity in  
38  
39  
40 97 Changchun, Jilin.

## 41 42 43 98 **Methods**

### 44 45 46 47 99 **Subjects**

48  
49  
50  
51 100 A cross-sectional survey was conducted in Changchun City, the capital of Jilin  
52  
53  
54 101 Province in Northeast China. The study sample comprised middle and high school  
55  
56  
57 102 students from six middle schools (three in urban areas and three in rural areas),  
58  
59  
60 103 selected randomly using stratified cluster sampling. Overall, 1955 students aged 11–

1  
2  
3  
4 104 18 years were included in this cross-sectional survey; subjects with  
5  
6  
7 105 overweight/obesity due to known metabolic and endocrine diseases were excluded.  
8  
9 106 Students were also excluded if they had mental or physical impairments severe  
10  
11  
12 107 enough to cause abnormal behaviors, including congenital disease, intellectual  
13  
14  
15 108 disability, and a psychiatric disorder [11]. We used the STROBE checklist in this  
16  
17  
18 109 study.

## 110 **Data collection**

111 The study was carried out by the First Hospital of Jilin University in April 2016. The  
112 study was approved by the ethics committee of the First Hospital of Jilin University  
113 (Reference Number: 2013-031). The investigation received informed consent from  
114 students and parents. The project was named “Effect and mechanism of weight loss  
115 on upper airway collapsibility in obese patients with OSAS” and studied the  
116 associations of overweight, obesity and related factors with sleep-related breathing  
117 disorders and snoring in adolescents. In this database, we focused on the relevant  
118 indicators of overweight and obesity in adolescents and analyzed the risk factors for  
119 obesity in adolescents. The interviewers from the First Hospital of Jilin University  
120 helped parents or guardians complete the questionnaire and provided the data. The  
121 questionnaire included demographic characteristics (age, sex, area, dietary habits,  
122 sleep, exercise, highest parental education, birth history, BMI classification, paternal  
123 weight and maternal weight), anthropometric parameters (weight, height) and a



1  
2  
3  
4 124 paediatric sleep questionnaire- the Sleep-Related Breathing Disorder (PSQ-SRBD).  
5

6  
7 125 The data about sleep duration and dietary habits (frequency of fresh fruits  
8

9  
10 126 consumption, frequency of dessert consumption, frequency of breakfast consumption,  
11

12  
13 127 frequency of fast food consumption, slowness in eating, picky eating) were selected  
14

15  
16 128 from the PSQ-SRBD scale according to various reports [12-14] about adolescent  
17

18  
19 129 obesity.  
20

### 21 130 **Key variables**

22  
23  
24  
25 131 Body mass index (BMI) is used here as an indicator of overweight and obesity in  
26

27  
28 132 adolescents and adults. Weight category was defined using age- and sex- specific  
29

30  
31 133 BMI cutoff points specifically developed for the Chinese adolescent population [15].  
32

33  
34 134 We used the 85<sup>th</sup> and 95<sup>th</sup> percentiles to define overweight and obesity in adolescents.  
35

36  
37 135 Therefore, BMI values of 24 and 28 were used as cut-off points  
38

39  
40 136 for overweight and obesity, both for males and females aged 18 years, which were  
41

42  
43 137 consistent with Chinese adults. In our study, parental overweight was divided into 2  
44

45  
46 138 groups: normal (BMI<24) and overweight or obese (BMI≥24) [14, 16]. Parents and  
47

48  
49 139 caregivers provided information on adolescents' weight (to the nearest 1 kg) and  
50

51  
52 140 height (to the nearest 1 cm). Overall children were classified by age into 3 groups  
53

54  
55 141 (<13 years, 13-15 years, >15 years), by region into 2 groups (urban, rural) and by sex  
56

57  
58 142 into 2 groups (male, female). Participants who slept less than 8 hours over 3 days a  
59

60  
143 week were classified as 'sleep <8 h', and those who slept more than 10 hours over 3

1  
2  
3  
4 144 days a week were defined as 'sleep >10 h' [17]. Birth history was divided into 3  
5  
6  
7 145 groups: preterm birth (infants born alive before 37 weeks of pregnancy), full-term  
8  
9  
10 146 birth (infants born alive after 37 completed weeks to less than 42 completed weeks)  
11  
12 147 and post-term birth (infants born alive at 42 completed weeks or after) [18]. Parental  
13  
14  
15 148 educational level was divided into 4 groups: primary school or lower (including those  
16  
17  
18 149 who had never attended school and those with elementary schooling only), junior high  
19  
20  
21 150 school, senior high school (including those with 3 years of secondary vocational  
22  
23 151 schooling) and university or above [17]. According to the contents of the  
24  
25  
26 152 questionnaire, we classified the participants' eating habits. According to the Food  
27  
28  
29 153 Guide Pagoda [19], fruit intake should be 200-350 g/d, and sugar intake should be no  
30  
31 154 more than 50 g/d, so we used eating "fresh fruits more than two days per week (350  
32  
33  
34 155 g/d)", "dessert more than two days per week", "breakfast more than two days per  
35  
36  
37 156 week", and "fast food more than two days per week" as cut-offs. Participants who  
38  
39  
40 157 were classified as "picky eating" were defined as adolescents who had selectivity for  
41  
42  
43 158 a particular kind of food [20]. "Slowness in eating" was defined as adolescents with  
44  
45  
46 159 higher masticatory performance and who ate slowly [21]. Groups were formed  
47  
48  
49 160 according to the number of exercise days (aerobic, strength training or both for at  
50  
51  
52 161 least 30 minutes a day), including never (participate in sports  $\leq$  1 day per week),  
53  
54  
55 162 sometimes (participate in sports 2-3 days per week) and often (participate in sports  $\geq$   
56  
57  
58 163 4 days per week) [22, 23].

## 164 **Statistical analysis**

1  
2  
3  
4 165 Data input was performed using Epidata 3.1, and statistical analysis was performed  
5  
6  
7 166 using SPSS 24.0. Frequency distributions are used to characterize subjects, and  
8  
9  
10 167 percentage data are used to report prevalence. The relationship between each factor  
11  
12 168 and the adolescents' weight status was reflected by  $\chi^2$  tests and univariate and  
13  
14  
15 169 multivariate logistic regression. In univariate analysis, when  $P < 0.10$ , significant  
16  
17  
18 170 correlation factors were included in a forward stepwise multivariate logistic  
19  
20  
21 171 regression to exclude confounding factors. In all analyses, a two-tailed  $P$  value  $< 0.05$   
22  
23  
24 172 was considered statistically significant. Since the database was manually collated,  
25  
26  
27 173 some variables in the database had missing values, which resulted in waste and bias of  
28  
29  
30 174 data resources. The missing value was numeric, and the data were approximately  
31  
32  
33 175 normally distributed. The mean interpolation method was adopted in this study.  
34  
35  
36 176 Therefore, we used the "replace missing value" function in SPSS 24.0 and selected  
37  
38  
39 177 the "mean of nearby points" method to interpolate the missing values.

## 40 178 **Data availability**

41  
42  
43  
44 179 Data referenced in this study are available in the project titled "Effect and mechanism  
45  
46  
47 180 of weight loss on upper airway collapsibility in obese patients with OSAS". We  
48  
49  
50 181 selected a portion of the data from the database, including body measurements of  
51  
52  
53 182 adolescents from six middle schools in Changchun City. The data that support the  
54  
55  
56 183 findings of this study are available on request from the corresponding author [HY].  
57  
58  
59 184 The data are not publicly available because they contain information that could  
60

1  
2  
3  
4 185 compromise research participant privacy or consent.  
5  
6  
7

## 8 186 **Patient and public involvement**

9

10  
11 187 The interviewers from the First Hospital of Jilin University helped parents or  
12  
13  
14 188 guardians complete the questionnaire and provided the data. The adolescents were not  
15  
16  
17 189 involved in the design, recruitment or conduction of the study.  
18  
19

## 20 21 190 **Results**

22

23  
24  
25 191 On the basis of the inclusion and exclusion criteria, we chose 1955 adolescents from  
26  
27  
28 192 Changchun, and of these adolescents, 1825 were finally analyzed in this study.  
29  
30  
31 193 Participants with missing BMI values were excluded from the study. Since the survey  
32  
33  
34 194 was already completed, we were unable to verify the source of data errors, so we  
35  
36  
37 195 deleted data with missing BMI values. According to the analysis of the frequency  
38  
39  
40 196 distribution, we found that there were 837 boys and 988 girls included; the median  
41  
42  
43 197 age of the students was 15.30 years, ranging from 11 to 18 years; of all these subjects,  
44  
45  
46 198 42.9% were from rural regions and 57.1% were from urban regions; and most of the  
47  
48  
49 199 subjects were Han Chinese, accounting for 98.2%, with only a few participants with  
50  
51  
52 200 minority ethnicities.

53  
54  
55 201 According to the worldwide BMI classification, the overall prevalence of overweight  
56  
57  
58 202 was 12.7% (male 17.4%; female 10.1%), and the prevalence of obesity was 4.9%  
59  
60  
61 203 (male 8.8%; female 3.1%) in Changchun City, Jilin Province (Table 1). The

204 overweight and obese rates were both higher in males than that in females ( $P < 0.001$ ).

205 A higher prevalence of overweight was found in subjects whose ages ranged from

206 11-12 years, and the prevalence of obesity was higher in the age group from 13-15

207 years ( $P = 0.008$ ). Children from urban areas showed a significantly higher proportion

208 of overweight. Full-term birth subjects had a higher prevalence of overweight than

209 others ( $P = 0.014$ ). In addition, students who ate fruits more than twice a week ( $P$

210  $= 0.029$ ), ate slowly ( $P = 0.004$ ), and were picky ( $P = 0.028$ ) had a lower higher

211 prevalence of overweight in the study. Paternal weight ( $P = 0.018$ ) and maternal

212 weight ( $P = 0.006$ ) also had an effect on the children's weight.

213 **Table 1**

214 **Prevalence of overweight and obesity according to demographic characteristics**

| Variables                 | n    | Overweight      |          | Obesity       |          |
|---------------------------|------|-----------------|----------|---------------|----------|
|                           |      | PR (%)          | <i>p</i> | PR (%)        | <i>p</i> |
| Sex                       |      |                 |          |               |          |
| Male                      | 837  | 17.4(14.9-20.3) | <0.001   | 8.8(6.9-11.2) | <0.001   |
| Female                    | 988  | 10.1 (8.3-12.2) |          | 3.1(2.2-4.5)  |          |
| Area                      |      |                 |          |               |          |
| Urban                     | 1042 | 14.4(12.4-16.7) | 0.14     | 5.6(4.2-7.3)  | 0.863    |
| Rural                     | 783  | 12(9.8-14.5)    |          | 5.8(4.3-7.8)  |          |
| Age                       |      |                 |          |               |          |
| <13                       | 168  | 19.3(13.9-26.1) | 0.008    | 5.1(2.5-10.3) | 0.816    |
| 13-15                     | 1157 | 11.6(9.8-13.6)  |          | 5.9(4.6-7.5)  |          |
| >15                       | 500  | 15.5(12.5-19.0) |          | 5.2(3.4-7.7)  |          |
| Birth history             |      |                 |          |               |          |
| Full-term birth           | 1621 | 14.2(12.5-16.0) | 0.014    | 6.0(4.9-7.4)  | 0.285    |
| Preterm birth             | 133  | 5.4(2.6-11.0)   |          | 3.2(1.2-8.2)  |          |
| Post-term birth           | 71   | 10.1(4.9-19.8)  |          | 3.1(0.8-11.7) |          |
| Fruit $\leq$ 2 times/week |      |                 |          |               |          |
| Yes                       | 1259 | 12.2(10.5-14.2) | 0.029    | 4.8(3.7-6.2)  | 0.02     |
| No                        | 566  | 16.1(13.2-19.5) |          | 7.7(5.6-10.4) |          |
| Dessert $\leq$ 2          |      |                 |          |               |          |

|                            |      |                 |       |               |       |  |
|----------------------------|------|-----------------|-------|---------------|-------|--|
| times/week                 |      |                 |       |               |       |  |
| Yes                        | 887  | 12.4(10.4-14.8) | 0.252 | 5.2(3.9-7.0)  | 0.49  |  |
| No                         | 938  | 14.3(12.1-16.7) |       | 6.0(4.6-7.9)  |       |  |
| Breakfast $\leq$ 2         |      |                 |       |               |       |  |
| times/week                 |      |                 |       |               |       |  |
| Yes                        | 1478 | 13.9(12.2-15.8) | 0.185 | 5.8(4.7-7.3)  | 0.491 |  |
| No                         | 347  | 11.1(8.2-15.0)  |       | 4.8(2.9-7.9)  |       |  |
| Fast food $\leq$ 2         |      |                 |       |               |       |  |
| times/week                 |      |                 |       |               |       |  |
| Yes                        | 264  | 10.0(6.8-14.3)  | 0.095 | 5.4(3.2-9.1)  | 0.402 |  |
| No                         | 1561 | 13.9(12.3-15.8) |       | 5.7(4.6-7.1)  |       |  |
| Slowness in eating         |      |                 |       |               |       |  |
| Yes                        | 1174 | 16.5(13.8-19.7) | 0.004 | 6.2(4.5-8.5)  | 0.496 |  |
| No                         | 651  | 11.6(9.9-13.6)  |       | 5.4(4.1-6.9)  |       |  |
| Picky eating               |      |                 |       |               |       |  |
| Yes                        | 1133 | 14.8(12.8-17.1) | 0.028 | 6.7(5.3-8.4)  | 0.027 |  |
| No                         | 692  | 11.1(8.9-13.7)  |       | 4.0(2.7-5.9)  |       |  |
| Exercise                   |      |                 |       |               |       |  |
| Never                      | 451  | 15.9(12.7-19.6) | 0.194 | 4.2(2.6-6.7)  | 0.315 |  |
| Sometimes                  | 478  | 12(9.3-15.3)    |       | 6.6(4.6-9.4)  |       |  |
| Often                      | 896  | 12.8(10.7-15.2) |       | 5.8(4.4-7.7)  |       |  |
| Highest parental education |      |                 |       |               |       |  |
| Primary school or lower    | 95   | 8.0(3.8-15.8)   | 0.196 | 8.0(3.8-15.8) | 0.724 |  |
| Junior high school         | 799  | 13.0(10.8-15.6) |       | 5.1(3.7-7.1)  |       |  |
| Senior high school         | 468  | 15.8(12.7-19.5) |       | 6.0(4.1-8.8)  |       |  |
| University or above        | 463  | 12.7(9.9-16.2)  |       | 5.7(3.8-8.4)  |       |  |
| Sleep (hours/night)        |      |                 |       |               |       |  |
| <8                         | 884  | 13.6(11.5-16.1) | 0.809 | 5.3(3.9-7.2)  | 0.302 |  |
| 8-10                       | 861  | 13.3(11.1-15.8) |       | 5.6(4.2-7.5)  |       |  |
| >10                        | 80   | 11.0(5.6-20.4)  |       | 9.7(4.7-19.0) |       |  |
| Paternal weight            |      |                 |       |               |       |  |
| Normal                     | 827  | 15.4(13.1-18.1) | 0.018 | 7.6(6.0-9.8)  | 0.002 |  |
| Ow or ob                   | 998  | 11.6(9.6-13.7)  |       | 3.8(2.7-5.4)  |       |  |
| Maternal weight            |      |                 |       |               |       |  |
| Normal                     | 1099 | 14.8(13.0-16.8) | 0.006 | 5.6(4.4-7.0)  | 0.807 |  |
| Ow or ob                   | 726  | 8.5(6.1-11.7)   |       | 5.8(3.9-8.7)  |       |  |

215 Note: *PR* (%), Prevalence rate; Ow or ob, Overweight or obese

216 To facilitate regression analysis, we divided the participants into two groups:

217 underweight/normal weight and overweight/obese. Table 2 shows the univariate  
 218 analysis of correlates of overweight and obesity in adolescents. As impressively  
 219 demonstrated in this table, the following factors all showed significant differences  
 220 between two groups: sex, age, birth history, frequency of eating fruits, eating habits  
 221 (slowness in eating, picky eating), and parental weights ( $P < 0.05$ ). According to the  
 222 results, we added all these significant factors to a forward stepwise multivariate  
 223 logistic regression model.

224 **Table 2**

225 **Univariate analysis of correlates of overweight and obesity in adolescents in Changchun**

| Variables                        | <i>p</i> | <i>OR</i> | 95% <i>CI</i> |
|----------------------------------|----------|-----------|---------------|
| Sex                              |          |           |               |
| Female                           | <0.001   | 1         |               |
| Male                             |          | 2.13      | 1.66-2.72     |
| Area                             |          |           |               |
| Urban                            | 0.256    | 1         |               |
| Rural                            |          | 1.15      | 0.90-1.47     |
| Age                              |          |           |               |
| <13                              | 0.070    | 1         |               |
| 13-15                            | 0.041    | 0.67      | 0.45-0.98     |
| >15                              | 0.339    | 0.81      | 0.53-1.24     |
| Birth history                    |          |           |               |
| Full-term birth                  | 0.008    | 1         |               |
| Preterm birth                    | 0.004    | 0.40      | 0.21-0.74     |
| Post-term birth                  | 0.209    | 0.63      | 0.31-1.29     |
| Fresh fruits $\leq 2$ times/week |          |           |               |
| Yes                              | 0.003    | 1         |               |
| No                               |          | 1.46      | 1.13-1.87     |
| Dessert $\leq 2$ times/week      |          |           |               |
| Yes                              | 1.197    | 1         |               |
| No                               |          | 1.17      | 0.92-1.49     |
| Breakfast $\leq 2$ times /week   |          |           |               |
| Yes                              | 0.15     | 1         |               |
| No                               |          | 0.79      | 0.57-1.09     |

|                                |                         |       |      |           |
|--------------------------------|-------------------------|-------|------|-----------|
| Fast food $\leq$ 2 times /week |                         |       |      |           |
|                                | Yes                     | 0.135 | 1    |           |
|                                | No                      |       | 1.32 | 0.92-1.91 |
| Slowness in eating             |                         |       |      |           |
|                                | Yes                     | 0.007 | 1    |           |
|                                | No                      |       | 0.71 | 0.56-0.91 |
| Picky eating                   |                         |       |      |           |
|                                | Yes                     | 0.004 | 1    |           |
|                                | No                      |       | 0.69 | 0.53-0.88 |
| Exercise                       |                         |       |      |           |
|                                | Never                   | 0.74  | 1    |           |
|                                | Sometimes               | 0.502 | 0.89 | 0.64-1.25 |
|                                | Often                   | 0.484 | 0.90 | 0.67-1.21 |
| Highest parental education     |                         |       |      |           |
|                                | Primary school or lower | 0.411 | 1    |           |
|                                | Junior high school      | 0.594 | 1.18 | 0.65-2.14 |
|                                | Senior high school      | 0.229 | 1.45 | 0.79-2.68 |
|                                | University or above     | 0.58  | 1.19 | 0.64-2.21 |
| Sleep (hours/night)            |                         |       |      |           |
|                                | <8                      | 0.964 | 1    |           |
|                                | 8-10                    | 0.952 | 0.99 | 0.78-1.27 |
|                                | >10                     | 0.805 | 1.08 | 0.60-1.94 |
| Paternal weight                |                         |       |      |           |
|                                | Normal                  | 0.001 | 1    |           |
|                                | Ow or ob                |       | 0.64 | 0.51-0.83 |
| Maternal weight                |                         |       |      |           |
|                                | Normal                  | 0.011 | 1    |           |
|                                | Ow or ob                |       | 0.67 | 0.49-0.91 |

226 Note: Ow or ob, Overweight or obesity

227 Table 3 shows the results of logistic regression models comparing the prevalence of  
 228 the potential risk factors: sex, age, birth history, frequency of eating fruits, dietary  
 229 habits (slowness in eating, picky eating) and parental weight. In this forward stepwise  
 230 multivariate logistic regression model, males were more likely to be overweight and  
 231 obese than females (OR=1.91, 95% CI: 1.48-2.50). Students aged 13-15 years  
 232 (OR=0.63, 95% CI: 0.42-0.96) were less likely to be overweight than those aged



1  
2  
3  
4 233 11-12 years. Compared with full-term birth, preterm birth (OR=0.45, 95% CI:  
5  
6  
7 234 0.24-0.85) was associated with normal weight. Participants who ate fruit more than  
8  
9  
10 235 twice a week (OR=1.41, 95% CI: 1.09-1.84) were more likely to be overweight or  
11  
12 236 obese. Moreover, the prevalence of overweight was higher in students who ate  
13  
14  
15 237 quickly (OR=1.37, 95% CI: 1.06-1.78) than those who ate slowly. Compared with  
16  
17  
18 238 picky eaters, students who were not picky (OR=0.69, 95%CI: 0.53-0.90) were less  
19  
20  
21 239 likely to be overweight.  
22

23 240 **Table 3**

24 241 **Multivariate regression analysis of correlates of overweight and obesity in**

25 242 **Changchun**

| Variables                        | <i>p</i> | $\beta$ | SE   | OR   | 95% CI    |
|----------------------------------|----------|---------|------|------|-----------|
| Sex                              |          |         |      | 1    |           |
| Female                           |          |         |      | 1    |           |
| Male                             | <0.001   | 0.65    | 0.13 | 1.91 | 1.48-2.50 |
| Age                              |          |         |      | 1    |           |
| <13                              |          |         |      | 1    |           |
| 13-15                            | 0.030    | -0.46   | 0.21 | 0.63 | 0.42-0.96 |
| >15                              | 0.121    | -0.35   | 0.23 | 0.70 | 0.45-1.10 |
| Birth history                    |          |         |      | 1    |           |
| Full-term birth                  |          |         |      | 1    |           |
| Preterm birth                    | 0.014    | -0.80   | 0.33 | 0.45 | 0.24-0.85 |
| Post-term birth                  | 0.337    | -0.36   | 0.37 | 0.70 | 0.34-1.45 |
| Fresh fruits $\leq$ 2 times/week |          |         |      | 1    |           |
| Yes                              |          |         |      | 1    |           |
| No                               | 0.010    | 0.35    | 0.14 | 1.41 | 1.09-1.84 |
| Slowness in eating               |          |         |      | 1    |           |
| Yes                              |          |         |      | 1    |           |
| No                               | 0.016    | 0.32    | 0.13 | 1.37 | 1.06-1.78 |
| Picky eating                     |          |         |      | 1    |           |
| Yes                              |          |         |      | 1    |           |
| No                               | 0.007    | -0.37   | 0.14 | 0.69 | 0.53-0.90 |
| Paternal weight                  |          |         |      |      |           |

|                 |          |       |       |      |      |           |
|-----------------|----------|-------|-------|------|------|-----------|
|                 | Normal   |       |       |      | 1    |           |
|                 | Ow or ob | 0.002 | -0.41 | 0.13 | 0.67 | 0.51-0.83 |
| Maternal weight | Normal   |       |       |      |      |           |
|                 | Ow or ob | 0.049 | -0.32 | 0.17 | 0.72 | 0.53-0.99 |

243 Note: Ow or ob, Overweight or obese

## 244 Discussion

245 To describe the epidemiology of overweight and obesity in Changchun City and  
 246 analyze the influencing factors in adolescents, we conducted this survey of middle  
 247 school students aged 11–18 years from urban and rural areas. We found that sex,  
 248 dietary habits and parental weight had a significant impact on the children's weight.

249 Based on the data, we found that the prevalence of overweight was 12.7% (male  
 250 17.4%; female 10.1%) and that the prevalence of obesity was 4.9% (male 8.8%;  
 251 female 3.1%) among adolescents in Changchun City, Jilin Province. However, in  
 252 recent studies, the overall prevalence of obesity in school-aged children in Xi'an was  
 253 4.11%, and the rate of overweight was 6.6% among Nanjing adolescents; these rates  
 254 were both lower than the corresponding rates in Changchun. This difference may be  
 255 caused by the sample size, sex, and age of the studied population [24, 25]. In addition,  
 256 demographic distribution and environmental factors are probable factors [26]. The  
 257 economy in northeast China is less developed than that in east and south China to  
 258 some extent [27]. Rates of overweight and obesity in rural areas were also higher in  
 259 the north than that in the south [28]. Depending on the season, people in the north  
 260 might eat high-energy foods to combat the cold, which is referred to “energy balance

1  
2  
3  
4 261 related behaviors [29, 30]". In our data, boys were more often obese than girls, in  
5  
6  
7 262 general, which was in agreement with previous Chinese reports [30-32]. A Swedish  
8  
9  
10 263 report [33] predicted that there was an alarming increase in the prevalence of  
11  
12 264 overweight and obesity among adolescent boys, which was consistent with our  
13  
14  
15 265 finding. On the one hand, in traditional Chinese culture, the preference for boys may  
16  
17  
18 266 be the reason for the differences in diet, and the elderly believe that fat boys are more  
19  
20  
21 267 powerful than thin boys. On the other hand, well-groomed and fit girls are more  
22  
23 268 favored by Chinese society [34-36]. Girls also tend to be more concerned about their  
24  
25  
26 269 weight than boys.

27  
28 270 We also found that adolescents who were picky, ate more fruits in general and ate  
29  
30  
31 271 quickly were more likely to be overweight or obese according to our survey. In recent  
32  
33  
34 272 reports [37, 38], a greater fruit intake was a protective factor against overweight,  
35  
36  
37 273 which was opposite of our result. Fructose, which is ubiquitous found in fruit and  
38  
39  
40 274 sugar-sweetened beverages, is one of the factors contributing to rising obesity rates  
41  
42  
43 275 [39, 40]. High intakes of fructose may decrease the abundance of the bacterial species  
44  
45  
46 276 *Eubacterium eligens*, reduce metabolism of monosaccharide and lose the ability to  
47  
48  
49 277 consume large amounts of fat [41]. The fructose intake threshold of adolescents is  
50  
51  
52 278 currently average 75g/d. If teenagers get too much fructose without consuming  
53  
54  
55 279 glycogen in time, fructose will be converted into fat at a higher rate [42, 43]. Based on  
56  
57  
58 280 the results of our study, it was reasonable to speculate that the children were already  
59  
60 281 full in addition to the excessive intake of fruits with high sugar content. Moreover, the

1  
2  
3  
4 282 heavy study demand in China makes the children fail to consume the extra energy  
5  
6  
7 283 through exercise, thus leading to the possibility of being overweight. For obese  
8  
9  
10 284 children, their parents believe they can control their weight by increasing their fruit  
11  
12 285 intake. This may also have contributed to the fact that the children in our  
13  
14  
15 286 cross-sectional study who ate more fruit were more likely to be overweight. However,  
16  
17  
18 287 given our inconsistent results with previous finding [37, 38], whether the reason is  
19  
20  
21 288 due to different classification needs further research.

22  
23 289 According to a recent study [44], food preference was an independent risk factor for  
24  
25  
26 290 overweight among children. It is known that children who had selectivity for a  
27  
28  
29 291 particular kind of food would prefer more fast food, snacks, and sugary beverage [45]  
30  
31  
32 292 and fewer fruits and vegetables [46]. However, the frequency of dessert and fast food  
33  
34  
35 293 consumption had no significant effect in our study, perhaps because the data were  
36  
37  
38 294 provided by parents or guardians who provided an inaccurate account of how often  
39  
40  
41 295 their children ate sweets and fast food. Currently, several studies have considered that  
42  
43  
44 296 food intake is a primary factor that determines body weight [47-49]. Y Li et al.  
45  
46  
47 297 concluded that excessive intake of cooking oil might be one of the risk factors for  
48  
49  
50 298 overweight [22]. According to a previous study in Tianjin [47], overweight students  
51  
52  
53 299 preferred significantly more sweet foods and take-out food than their counterparts  
54  
55  
56 300 with normal weight. The result might be influenced by many elements, such as peer  
57  
58  
59 301 influence, food price, convenience, and online influence and so on, based on a recent  
60  
302 report [50]. To decrease the prevalence of overweight and obesity, a series of

1  
2  
3  
4 303 interventions have been implemented, such as controlling TV time and increasing  
5  
6  
7 304 sport time.

8  
9 305 In our research, we found that if fathers and mothers were overweight, adolescents  
10  
11  
12 306 were less likely to be overweight, which was inconsistent with the previous  
13  
14  
15 307 conclusions [51-53]. Studies [54, 55] have found that a higher BMI of the father  
16  
17  
18 308 increased the risk of overweight/ obesity among males and females. However, this  
19  
20  
21 309 finding was not consistent across studies. In a previous study, the researchers found  
22  
23  
24 310 that the relationship between parents' and children's BMI did not exist when  
25  
26  
27 311 longitudinal analyses of changes in BMI over four years were performed [56]. This  
28  
29  
30 312 may explain why a short period of periodic surveys alone does not fully demonstrate a  
31  
32  
33 313 parent-child link to obesity, and we still need long-term research to further explore the  
34  
35  
36 314 relationship between the two factors. Berge JM et al. found that overweight or obese  
37  
38  
39 315 parents were more likely to adopt a strict dietary restriction to prevent adolescent  
40  
41  
42 316 obesity [57]. Moreover, children's growing environment and living habits will also  
43  
44  
45 317 affect their own obesity level, which will have an impact on our results [50]. Further  
46  
47  
48 318 prospective studies that assess both energy expenditure and energy intake in children  
49  
50  
51 319 are more likely to clarify this concept.

52  
53 320 However, some potential limitations exist in this cross-sectional study. The contents  
54  
55  
56 321 of the questionnaire were most recalled by the parents or guardians and there might be  
57  
58  
59 322 information bias in this survey. In addition, we set the classification standard of eating  
60  
323 fruit frequency as "eating fruit 2 days a week" combined with the questionnaire data

1  
2  
3  
4 324 recalled by the parents or guardians, which may not be appropriate. Further studies  
5  
6  
7 325 considering different classification and a quantitative measurement are required.  
8  
9

## 10 326 **Conclusions**

11  
12  
13  
14  
15 327 In summary, in this cross-sectional study, we found that the prevalence of overweight  
16  
17 328 and obesity among adolescents in Changchun, Jilin Province was high. Sex, age, birth  
18  
19  
20 329 history, dietary habits, and parental weight were important factors for overweight and  
21  
22  
23 330 obesity in adolescents. Therefore, reasonable lifestyle and effective weight control are  
24  
25  
26 331 necessary to prevent overweight and obesity in adolescents. There are still several  
27  
28 332 limitations in this study, and we need to obtain more accurate information and  
29  
30  
31 333 perform more specific analysis. Further research should be conducted on the health of  
32  
33  
34 334 adolescents in China and further intervention measures should be implemented to  
35  
36  
37 335 decrease the prevalence of overweight and obesity.  
38  
39

## 40 336 **Acknowledgements**

41  
42  
43  
44  
45 337 Thanks to all those who helped with the investigation and the participants.  
46  
47  
48

## 49 338 **Footnotes**

50  
51  
52  
53 339 **Contributors:** RD, CK and HY conceived the study, participated in the design of the  
54  
55  
56 340 study. HY, JJ and XL collected data. RD carried out the measurements, analyzed the  
57  
58  
59 341 data and drafted the manuscript. XY and BZ participated in the coordination of the  
60

1  
2  
3  
4 342 study and interpreted the data. WB and YL revised the manuscript. All authors have  
5  
6  
7 343 approved the final article.

8  
9 344 **Funding:** This study was supported by the National Key Research and Development  
10  
11  
12 345 Program (2016YFC1300100) and the National Natural Science Foundation of China  
13  
14  
15 346 (Grant Number: 81970081, 81300062).

16  
17  
18 347 **Competing interests:** None declared.

19  
20 348 **Ethical approval:** The investigation was conducted by the First Hospital of Jilin  
21  
22  
23 349 University in April 2016, our data collected from the questionnaire in the survey as  
24  
25  
26 350 well. The study was approved by the ethics committee of the First Hospital of Jilin  
27  
28  
29 351 University (Reference Number: 2013-031). The investigation has received informed  
30  
31  
32 352 consent from students and parents.

33  
34 353 **Data sharing:** Extra data can be accessed via the Dryad data repository at  
35  
36  
37 354 <http://datadryad.org/> with the doi:10.5061/dryad.gljwstqnw

## 38 39 40 41 355 **References**

- 42  
43  
44 356 1 Worldwide trends in body-mass index, underweight, overweight, and obesity from  
45 357 1975 to 2016: a pooled analysis of 2416 population-based measurement  
46 358 studies in 128.9 million children, adolescents, and adults. *Lancet (London,*  
47 359 *England)* 2017;390(10113):2627-42. doi: 10.1016/s0140-6736(17)32129-3  
48 360 [published Online First: 2017/10/17]
- 49 361 2 Global Health Observatory Data Repository. 2017. Available  
50 362 online:<http://apps.who.int/gho/data/view.main.BMIPLUS2C10-19v?lang=en>  
51 363 (accessed on 29 September 2017)
- 52 364 3 Jiang Y, Wang J, Wu S, et al. Association between Take-Out Food Consumption and  
53 365 Obesity among Chinese University Students: A Cross-Sectional Study.  
54 366 *International journal of environmental research and public health* 2019;16(6)  
55 367 doi: 10.3390/ijerph16061071 [published Online First: 2019/04/03]
- 56  
57  
58  
59  
60

- 1  
2  
3 368 4 Rong Y, Niu CY, Zhao HX, et al. Association of Adolescent Obesity with Nonalcoholic  
4 369 Fatty Liver Disease and Related Risk Factors in Xi 'an, China. *Annals of*  
5 370 *Hepatology Official Journal of the Mexican Association of Hepatology*  
6 371 2018;17(1):85-91.  
7  
8  
9 372 5 Lisan Q, Van Sloten T, Marques Vidal P, et al. Association of Positive Airway  
10 373 Pressure Prescription With Mortality in Patients With Obesity and Severe  
11 374 Obstructive Sleep Apnea: The Sleep Heart Health Study. *JAMA*  
12 375 *otolaryngology-- head & neck surgery* 2019 doi: 10.1001/jamaoto.2019.0281  
13 376 [published Online First: 2019/04/12]  
14  
15 377 6 Lai SH, Tsai YW, Chen YC, et al. Obesity, hyperhomocysteinaemia and risk of  
16 378 chronic kidney disease: a population-based study. *Family Practice* 2017;35(3)  
17  
18 379 7 Sabanayagam C, Wong TY, Liao J, et al. Body mass index and preclinical kidney  
19 380 disease in Indian adults aged 40 years and above without chronic kidney  
20 381 disease. *Clinical and experimental nephrology* 2014;18(6):919-24. doi:  
21 382 10.1007/s10157-014-0945-6 [published Online First: 2014/02/15]  
22  
23 383 8 Addo PN, Nyarko KM, Sackey SO, et al. Prevalence of obesity and overweight and  
24 384 associated factors among financial institution workers in Accra Metropolis,  
25 385 Ghana: a cross sectional study. *BMC research notes* 2015;8:599. doi:  
26 386 10.1186/s13104-015-1590-1 [published Online First: 2015/10/27]  
27  
28 387 9 Sun H, Ma Y, Han D, et al. Prevalence and trends in obesity among China's children  
29 388 and adolescents, 1985-2010. *PloS one* 2014;9(8):e105469. doi:  
30 389 10.1371/journal.pone.0105469 [published Online First: 2014/08/21]  
31  
32 390 10 Zhang X, Zhang F, Yang J, et al. Prevalence of overweight and obesity among  
33 391 primary school-aged children in Jiangsu Province, China, 2014-2017. *PloS one*  
34 392 2018;13(8):e0202681. doi: 10.1371/journal.pone.0202681 [published Online  
35 393 First: 2018/08/24]  
36  
37 394 11 Ma Y, Peng L, Kou C, et al. Associations of Overweight, Obesity and Related  
38 395 Factors with Sleep-Related Breathing Disorders and Snoring in Adolescents: A  
39 396 Cross-Sectional Survey. *International journal of environmental research and*  
40 397 *public health* 2017;14(2) doi: 10.3390/ijerph14020194 [published Online  
41 398 First: 2017/02/18]  
42  
43 399 12 Rangan A, Zheng M, Olsen NJ, et al. Shorter sleep duration is associated with  
44 400 higher energy intake and an increase in BMI z-score in young children  
45 401 predisposed to overweight. *International journal of obesity (2005)*  
46 402 2018;42(1):59-64. doi: 10.1038/ijo.2017.216 [published Online First:  
47 403 2017/09/09]  
48  
49 404 13 Dello Russo M, Ahrens W, De Henauw S, et al. The Impact of Adding Sugars to  
50 405 Milk and Fruit on Adiposity and Diet Quality in Children: A Cross-Sectional  
51 406 and Longitudinal Analysis of the Identification and Prevention of Dietary- and  
52 407 Lifestyle-Induced Health Effects in Children and Infants (IDEFICS) Study.  
53 408 *Nutrients* 2018;10(10) doi: 10.3390/nu10101350 [published Online First:  
54 409 2018/09/27]  
55  
56  
57  
58  
59  
60



- 1  
2  
3 410 14 Wang H, Zhai F. Programme and policy options for preventing obesity in China.  
4 411 *Obesity Reviews* 2013;14(S2):134-40. doi: 10.1111/obr.12106
- 5  
6 412 15 Force. GoCOT. [Body mass index reference norm for screening overweight and  
7 413 obesity in Chinese children and adolescents]. *Zhonghua liu xing bing xue za*  
8 414 *zhi = Zhonghua liuxingbingxue zazhi* 2004;25(2):97-102. [published Online  
9 415 First: 2004/05/11]
- 10  
11 416 16 Zhou L, Zeng Q, Jin S, et al. The impact of changes in dietary knowledge on adult  
12 417 overweight and obesity in China. *PloS one* 2017;12(6):e0179551. doi:  
13 418 10.1371/journal.pone.0179551 [published Online First: 2017/06/24]
- 14  
15 419 17 Wang R, Zhang P, Gao C, et al. Prevalence of overweight and obesity and some  
16 420 associated factors among adult residents of northeast China: a  
17 421 cross-sectional study. *BMJ open* 2016;6(7):e010828. doi:  
18 422 10.1136/bmjopen-2015-010828 [published Online First: 2016/07/28]
- 19  
20 423 18 Slack E, Best KE, Rankin J, et al. Maternal obesity classes, preterm and post-term  
21 424 birth: a retrospective analysis of 479,864 births in England. *BMC pregnancy*  
22 425 *and childbirth* 2019;19(1):434. doi: 10.1186/s12884-019-2585-z [published  
23 426 Online First: 2019/11/23]
- 24  
25 427 19 Wang SS, Lay S, Yu HN, et al. Dietary Guidelines for Chinese Residents (2016):  
26 428 comments and comparisons. *Journal of Zhejiang University Science B*  
27 429 2016;17(9):649-56. doi: 10.1631/jzus.B1600341 [published Online First:  
28 430 2016/09/09]
- 29  
30 431 20 Antoniou EE, Roefs A, Kremers SP, et al. Picky eating and child weight status  
31 432 development: a longitudinal study. *Journal of human nutrition and dietetics :*  
32 433 *the official journal of the British Dietetic Association* 2016;29(3):298-307. doi:  
33 434 10.1111/jhn.12322 [published Online First: 2015/05/20]
- 34  
35 435 21 Oberle MM, Romero Willson S, Gross AC, et al. Relationships among Child Eating  
36 436 Behaviors and Household Food Insecurity in Youth with Obesity. *Childhood*  
37 437 *obesity (Print)* 2019;15(5):298-305. doi: 10.1089/chi.2018.0333 [published  
38 438 Online First: 2019/05/16]
- 39  
40 439 22 Li Y, Zhai F, Yang X, et al. Determinants of childhood overweight and obesity in  
41 440 China. *The British journal of nutrition* 2007;97(1):210-5. doi:  
42 441 10.1017/s0007114507280559 [published Online First: 2007/01/16]
- 43  
44 442 23 Kelley GA, Kelley KS. Exercise and BMI z-score in overweight and obese children  
45 443 and adolescents: protocol for a systematic review and network meta-analysis  
46 444 of randomised trials. *BMJ open* 2016;6(4):e011258. doi:  
47 445 10.1136/bmjopen-2016-011258 [published Online First: 2016/04/17]
- 48  
49 446 24 Xu F, Li J, Ware RS, et al. Associations of television viewing time with excess body  
50 447 weight among urban and rural high-school students in regional mainland  
51 448 China. *Public health nutrition* 2008;11(9):891-6. doi:  
52 449 10.1017/s1368980007001280 [published Online First: 2007/11/17]
- 53  
54 450 25 Yi X, Yin C, Chang M, et al. Prevalence and risk factors of obesity among  
55 451 school-aged children in Xi'an, China. *European journal of pediatrics*

- 1  
2  
3 452 2012;171(2):389-94. doi: 10.1007/s00431-011-1566-7 [published Online First:  
4 453 2011/09/14]
- 6 454 26 Hu L, Huang X, You C, et al. Prevalence of overweight, obesity, abdominal obesity  
7 455 and obesity-related risk factors in southern China. *PloS one*  
8 456 2017;12(9):e0183934. doi: 10.1371/journal.pone.0183934 [published Online  
9 457 First: 2017/09/15]
- 11 458 27 Li P, Jiang R, Li L, et al. Prevalence and risk factors of metabolic syndrome in  
12 459 school adolescents of northeast China. *Journal of pediatric endocrinology &*  
14 460 *metabolism : JPEM* 2014;27(5-6):525-32. doi: 10.1515/jpem-2013-0336  
15 461 [published Online First: 2014/05/14]
- 17 462 28 Reynolds K, Gu D, Whelton PK, et al. Prevalence and Risk Factors of Overweight  
18 463 and Obesity in China\*. *Obesity* 2012;15(1):10-18.
- 20 464 29 Zhuo Q, Wang Z, Piao J, et al. Geographic variation in the prevalence of  
21 465 overweight and economic status in Chinese adults. *The British journal of*  
22 466 *nutrition* 2009;102(3):413-8. doi: 10.1017/s0007114508184732 [published  
23 467 Online First: 2009/01/14]
- 25 468 30 Jia P, Xue H, Zhang J, et al. Time Trend and Demographic and Geographic  
26 469 Disparities in Childhood Obesity Prevalence in China-Evidence from Twenty  
27 470 Years of Longitudinal Data. *International journal of environmental research*  
28 471 *and public health* 2017;14(4) doi: 10.3390/ijerph14040369 [published Online  
29 472 First: 2017/04/01]
- 31 473 31 Jia P, Li M, Xue H, et al. School environment and policies, child eating behavior  
32 474 and overweight/obesity in urban China: the childhood obesity study in China  
33 475 megacities. *International journal of obesity (2005)* 2017;41(5):813-19. doi:  
34 476 10.1038/ijo.2017.2 [published Online First: 2017/01/12]
- 36 477 32 Zhang Y, Zhao J, Chu Z, et al. Increasing prevalence of childhood overweight and  
37 478 obesity in a coastal province in China. *Pediatric obesity* 2016;11(6):e22-e26.  
38 479 doi: 10.1111/ijpo.12070 [published Online First: 2015/09/26]
- 40 480 33 Eriksson M, Lingfors H, Golsater M. Trends in prevalence of thinness, overweight  
41 481 and obesity among Swedish children and adolescents between 2004 and  
42 482 2015. *Acta paediatrica (Oslo, Norway : 1992)* 2018;107(10):1818-25. doi:  
43 483 10.1111/apa.14356 [published Online First: 2018/04/11]
- 45 484 34 Li J, Lei J, Wen S, et al. Sex disparity and perception of obesity/overweight by  
46 485 parents and grandparents. *Paediatrics & child health* 2014;19(7):e113-6. doi:  
47 486 10.1093/pch/19.7.e113 [published Online First: 2014/10/22]
- 49 487 35 Zhang J, Wang H, Wang Z, et al. Prevalence and stabilizing trends in overweight  
50 488 and obesity among children and adolescents in China, 2011-2015. *BMC public*  
51 489 *health* 2018;18(1):571. doi: 10.1186/s12889-018-5483-9 [published Online  
52 490 First: 2018/05/03]
- 54 491 36 Zhai L, Dong Y, Bai Y, et al. Trends in obesity, overweight, and malnutrition among  
55 492 children and adolescents in Shenyang, China in 2010 and 2014: a multiple  
56 493 cross-sectional study. *BMC public health* 2017;17(1):151. doi:

- 1  
2  
3 494 10.1186/s12889-017-4072-7 [published Online First: 2017/02/06]  
4  
5 495 37 You J, Choo J. Adolescent Overweight and Obesity: Links to Socioeconomic Status  
6 496 and Fruit and Vegetable Intakes. *International journal of environmental*  
7 497 *research and public health* 2016;13(3) doi: 10.3390/ijerph13030307  
8 498 [published Online First: 2016/03/24]  
9  
10 499 38 Tohill BC, Seymour J, Serdula M, et al. What epidemiologic studies tell us about  
11 500 the relationship between fruit and vegetable consumption and body weight.  
12 501 *Nutrition reviews* 2004;62(10):365-74. doi:  
13 502 10.1111/j.1753-4887.2004.tb00007.x [published Online First: 2004/10/29]  
14  
15 503 39 Qi X, Tester RF. Fructose, galactose and glucose - In health and disease. *Clinical*  
16 504 *nutrition ESPEN* 2019;33:18-28. doi: 10.1016/j.clnesp.2019.07.004 [published  
17 505 Online First: 2019/08/28]  
18  
19 506 40 Choo VL, Vigiou E, Blanco Mejia S, et al. Food sources of fructose-containing  
20 507 sugars and glycaemic control: systematic review and meta-analysis of  
21 508 controlled intervention studies. *BMJ (Clinical research ed)* 2018;363:k4644.  
22 509 doi: 10.1136/bmj.k4644 [published Online First: 2018/11/23]  
23  
24 510 41 Jones RB, Alderete TL, Kim JS, et al. High intake of dietary fructose in  
25 511 overweight/obese teenagers associated with depletion of Eubacterium and  
26 512 Streptococcus in gut microbiome. *Gut microbes* 2019;10(6):712-19. doi:  
27 513 10.1080/19490976.2019.1592420 [published Online First: 2019/04/18]  
28  
29 514 42 Lustig RH. Fructose: it's "alcohol without the buzz". *Advances in nutrition*  
30 515 *(Bethesda, Md)* 2013;4(2):226-35. doi: 10.3945/an.112.002998 [published  
31 516 Online First: 2013/03/16]  
32  
33 517 43 Aller EE, Abete I, Astrup A, et al. Starches, sugars and obesity. *Nutrients*  
34 518 2011;3(3):341-69. doi: 10.3390/nu3030341 [published Online First:  
35 519 2012/01/19]  
36  
37 520 44 Xiong LH, Wang CL, Chen ZQ, et al. [Study on food preference and dietary  
38 521 behavior to overweight/obesity in school children and adolescents in  
39 522 Guangzhou: a case-control study]. *Zhonghua liu xing bing xue za zhi =*  
40 523 *Zhonghua liuxingbingxue zazhi* 2008;29(10):965-9. [published Online First:  
41 524 2009/01/29]  
42  
43 525 45 Qiu C, Hou M. Association between Food Preferences, Eating Behaviors and  
44 526 Socio-Demographic Factors, Physical Activity among Children and  
45 527 Adolescents: A Cross-Sectional Study. *Nutrients* 2020;12(3) doi:  
46 528 10.3390/nu12030640 [published Online First: 2020/03/04]  
47  
48 529 46 Ferreira RJ, Marques-Vidal PM. Prevalence and determinants of obesity in  
49 530 children in public schools of Sintra, Portugal. *Obesity (Silver Spring, Md)*  
50 531 2008;16(2):497-500. doi: 10.1038/oby.2007.74 [published Online First:  
51 532 2008/02/02]  
52  
53 533 47 Andegiorgish AK, Wang J, Zhang X, et al. Prevalence of overweight, obesity, and  
54 534 associated risk factors among school children and adolescents in Tianjin,  
55 535 China. *European journal of pediatrics* 2012;171(4):697-703. doi:

- 1  
2  
3 536 10.1007/s00431-011-1636-x [published Online First: 2011/12/14]  
4 537 48 Liu J, Hay J, Faught BE, et al. Family eating and activity habits, diet quality and  
5 538 pre-adolescent overweight and obesity. *Public health* 2012;126(6):532-4. doi:  
6 539 10.1016/j.puhe.2012.02.012 [published Online First: 2012/05/09]  
7  
8 540 49 An R. Diet quality and physical activity in relation to childhood obesity.  
9 541 *International journal of adolescent medicine and health* 2017;29(2) doi:  
10 542 10.1515/ijamh-2015-0045 [published Online First: 2015/09/10]  
11  
12 543 50 Watts AW, Lovato CY, Barr SI, et al. A qualitative study exploring how school and  
13 544 community environments shape the food choices of adolescents with  
14 545 overweight/obesity. *Appetite* 2015;95:360-7. doi:  
15 546 10.1016/j.appet.2015.07.022 [published Online First: 2015/07/28]  
16  
17 547 51 Naess M, Holmen TL, Langaas M, et al. Intergenerational Transmission of  
18 548 Overweight and Obesity from Parents to Their Adolescent Offspring - The  
19 549 HUNT Study. *PloS one* 2016;11(11):e0166585. doi:  
20 550 10.1371/journal.pone.0166585 [published Online First: 2016/11/17]  
21  
22 551 52 Tu AW, Watts AW, Masse LC. Parent-Adolescent Patterns of Physical Activity,  
23 552 Sedentary Behaviors and Sleep Among a Sample of Overweight and Obese  
24 553 Adolescents. *Journal of physical activity & health* 2015;12(11):1469-76. doi:  
25 554 10.1123/jpah.2014-0270 [published Online First: 2015/01/27]  
26  
27 555 53 Brennan L, Walkley J, Wilks R. Parent- and adolescent-reported barriers to  
28 556 participation in an adolescent overweight and obesity intervention. *Obesity*  
29 557 *(Silver Spring, Md)* 2012;20(6):1319-24. doi: 10.1038/oby.2011.358  
30 558 [published Online First: 2011/12/24]  
31  
32 559 54 Jiang MH, Yang Y, Guo XF, et al. Association between child and adolescent obesity  
33 560 and parental weight status: a cross-sectional study from rural North China.  
34 561 *The Journal of international medical research* 2013;41(4):1326-32. doi:  
35 562 10.1177/0300060513480081 [published Online First: 2013/06/19]  
36  
37 563 55 Shafaghi K, Shariff ZM, Taib MN, et al. Parental body mass index is associated with  
38 564 adolescent overweight and obesity in Mashhad, Iran. *Asia Pacific journal of*  
39 565 *clinical nutrition* 2014;23(2):225-31. doi: 10.6133/apjcn.2014.23.2.11  
40 566 [published Online First: 2014/06/06]  
41  
42 567 56 Maffei C, Talamini G, Tato L. Influence of diet, physical activity and parents'  
43 568 obesity on children's adiposity: a four-year longitudinal study. *International*  
44 569 *journal of obesity and related metabolic disorders : journal of the*  
45 570 *International Association for the Study of Obesity* 1998;22(8):758-64.  
46 571 [published Online First: 1998/09/02]  
47  
48 572 57 Berge JM, Meyer CS, Loth K, et al. Parent/Adolescent Weight Status Concordance  
49 573 and Parent Feeding Practices. *Pediatrics* 2015;136(3):e591-8. doi:  
50 574 10.1542/peds.2015-0326 [published Online First: 2015/08/26]  
51  
52 575  
53 576  
54  
55  
56  
57  
58  
59  
60

STROBE Statement—Checklist of items that should be included in reports of *cross-sectional studies*

|                              | Item No | Recommendation                                                                                                                                                                                    | Page/line number       |
|------------------------------|---------|---------------------------------------------------------------------------------------------------------------------------------------------------------------------------------------------------|------------------------|
| <b>Title and abstract</b>    | 1       | (a) Indicate the study's design with a commonly used term in the title or the abstract                                                                                                            | Page 1                 |
|                              |         | (b) Provide in the abstract an informative and balanced summary of what was done and what was found                                                                                               | Page 2-3, line 23-48   |
| <b>Introduction</b>          |         |                                                                                                                                                                                                   |                        |
| Background/rationale         | 2       | Explain the scientific background and rationale for the investigation being reported                                                                                                              | Page 3-5, line 61-90   |
| Objectives                   | 3       | State specific objectives, including any prespecified hypotheses                                                                                                                                  | Page 5, line 91-94     |
| <b>Methods</b>               |         |                                                                                                                                                                                                   |                        |
| Study design                 | 4       | Present key elements of study design early in the paper                                                                                                                                           | Page 5-6               |
| Setting                      | 5       | Describe the setting, locations, and relevant dates, including periods of recruitment, exposure, follow-up, and data collection                                                                   | Page 5-6               |
| Participants                 | 6       | (a) Give the eligibility criteria, and the sources and methods of selection of participants                                                                                                       | Page 5-6, line 97-104  |
| Variables                    | 7       | Clearly define all outcomes, exposures, predictors, potential confounders, and effect modifiers. Give diagnostic criteria, if applicable                                                          | Page 7-8, line 127-158 |
| Data sources/<br>measurement | 8*      | For each variable of interest, give sources of data and details of methods of assessment (measurement). Describe comparability of assessment methods if there is more than one group              | Page 6, line 107-125   |
| Bias                         | 9       | Describe any efforts to address potential sources of bias                                                                                                                                         | Page 9, line 167-172   |
| Study size                   | 10      | Explain how the study size was arrived at                                                                                                                                                         | Page 5, line 97-101    |
| Quantitative variables       | 11      | Explain how quantitative variables were handled in the analyses. If applicable, describe which groupings were chosen and why                                                                      | Page 7-8, line 127-158 |
| Statistical methods          | 12      | (a) Describe all statistical methods, including those used to control for confounding                                                                                                             | Page 8-9, line 160-172 |
|                              |         | (b) Describe any methods used to examine subgroups and interactions                                                                                                                               | Page 8-9, line 160-172 |
|                              |         | (c) Explain how missing data were addressed                                                                                                                                                       | Page 9, line 167-172   |
|                              |         | (d) If applicable, describe analytical methods taking account of sampling strategy                                                                                                                | N/A                    |
|                              |         | (e) Describe any sensitivity analyses                                                                                                                                                             | Page 8-9, line 160-172 |
| <b>Results</b>               |         |                                                                                                                                                                                                   |                        |
| Participants                 | 13*     | (a) Report numbers of individuals at each stage of study—eg numbers potentially eligible, examined for eligibility, confirmed eligible, included in the study, completing follow-up, and analysed | Page 10, line 186-192  |
|                              |         | (b) Give reasons for non-participation at each stage                                                                                                                                              | N/A                    |
|                              |         | (c) Consider use of a flow diagram                                                                                                                                                                | N/A                    |
| Descriptive data             | 14*     | (a) Give characteristics of study participants (eg demographic, clinical, social) and information on exposures and potential                                                                      | Page 9-10              |



|                          |     |                                                                                                                                                                                                              |                          |
|--------------------------|-----|--------------------------------------------------------------------------------------------------------------------------------------------------------------------------------------------------------------|--------------------------|
|                          |     | confounders                                                                                                                                                                                                  |                          |
|                          |     | (b) Indicate number of participants with missing data for each variable of interest                                                                                                                          | Page 10, line 186-190    |
| Outcome data             | 15* | Report numbers of outcome events or summary measures                                                                                                                                                         | Page10, line 186-192     |
| Main results             | 16  | (a) Give unadjusted estimates and, if applicable, confounder-adjusted estimates and their precision (eg, 95% confidence interval). Make clear which confounders were adjusted for and why they were included | Page 11-12               |
|                          |     | (b) Report category boundaries when continuous variables were categorized                                                                                                                                    | N/A                      |
|                          |     | (c) If relevant, consider translating estimates of relative risk into absolute risk for a meaningful time period                                                                                             | N/A                      |
| Other analyses           | 17  | Report other analyses done—eg analyses of subgroups and interactions, and sensitivity analyses                                                                                                               | Page 12-15               |
| <b>Discussion</b>        |     |                                                                                                                                                                                                              |                          |
| Key results              | 18  | Summarise key results with reference to study objectives                                                                                                                                                     | Page 16, line 240-243    |
| Limitations              | 19  | Discuss limitations of the study, taking into account sources of potential bias or imprecision. Discuss both direction and magnitude of any potential bias                                                   | Page 19, line 310-316    |
| Interpretation           | 20  | Give a cautious overall interpretation of results considering objectives, limitations, multiplicity of analyses, results from similar studies, and other relevant evidence                                   | Page 15-19               |
| Generalisability         | 21  | Discuss the generalisability (external validity) of the study results                                                                                                                                        | Page 19-20, line 318-326 |
| <b>Other information</b> |     |                                                                                                                                                                                                              |                          |
| Funding                  | 22  | Give the source of funding and the role of the funders for the present study and, if applicable, for the original study on which the present article is based                                                | Page 20, line 335-337    |

\*Give information separately for exposed and unexposed groups.

**Note:** An Explanation and Elaboration article discusses each checklist item and gives methodological background and published examples of transparent reporting. The STROBE checklist is best used in conjunction with this article (freely available on the Web sites of PLoS Medicine at <http://www.plosmedicine.org/>, Annals of Internal Medicine at <http://www.annals.org/>, and Epidemiology at <http://www.epidem.com/>). Information on the STROBE Initiative is available at [www.strobe-statement.org](http://www.strobe-statement.org).
